# Supplementary material
Source: PubMed Central journal article supplement (PMC7080946)
Supplement: 11606_2019_5449_MOESM1_ESM.pdf [file 11606_2019_5449_MOESM1_ESM.pdf]

# Supplementary Online Content 09/14/19

## Contents

| Section                                                                                                   | Page |
|-----------------------------------------------------------------------------------------------------------|------|
| Appendix Table 1. Sample Selection and Study Exclusions                                                   | 2    |
| Appendix Table 2. ICD-9 Principal Diagnoses for Medical Conditions                                        | 3    |
| Appendix Table 3. Characteristics of Randomly Split 90% Matching and 10% Risk Model Samples               | 5    |
| Appendix Table 4. AMI Risk Models                                                                         | 6    |
| Appendix Table 4a. AMI Risk Model for 30-Day Mortality                                                    | 6    |
| Appendix Table 4b. AMI Risk Model for ICU or Intermediate Care Utilization                                | 7    |
| Appendix Table 4c. AMI Risk Model for Predicted Cost                                                      | 8    |
| Appendix Table 4d. AMI Risk Model for Predicted LOS                                                       | 9    |
| Appendix Table 5. HF Risk Models                                                                          | 10   |
| Appendix Table 5a. HF Risk Model for 30-Day Mortality                                                     | 10   |
| Appendix Table 5b. HF Risk Model for ICU or Intermediate Care Utilization                                 | 11   |
| Appendix Table 5c. HF Risk Model for Predicted Cost                                                       | 12   |
| Appendix Table 5d. HF Risk Model for Predicted LOS                                                        | 13   |
| Appendix Table 6. PNA Risk Models                                                                         | 14   |
| Appendix Table 6a. PNA Risk Model for 30-Day Mortality                                                    | 14   |
| Appendix Table 6b. PNA Risk Model for ICU or Intermediate Care Utilization                                | 16   |
| Appendix Table 6c. PNA Risk Model for Predicted Cost                                                      | 17   |
| Appendix Table 6d. PNA Risk Model for Predicted LOS                                                       | 18   |
| Appendix Table 7. Propensity Score Models                                                                 | 19   |
| Appendix Table 7a. AMI Propensity Score Model                                                             | 19   |
| Appendix Table 7b. HF Propensity Score Model                                                              | 21   |
| Appendix Table 7c. PNA Propensity Score Model                                                             | 23   |
| Appendix Table 8. Definitions of Resource Utilization-based Costs and Payments                            | 25   |
| Appendix Table 9. Complete Matching Table for Combined Medical Conditions                                 | 29   |
| Appendix Table 9a. Complete Matching Table for AMI                                                        | 33   |
| Appendix Table 9b. Complete Matching Table for HF                                                         | 36   |
| Appendix Table 9c. Complete Matching Table for PNA                                                        | 39   |
| Appendix Table 10. Comparison of Readmission Analyses                                                     | 43   |
| Appendix Table 11. Results for Combined Medical Conditions                                                | 44   |
| Appendix Table 11a. Results for Matched AMI Pairs                                                         | 46   |
| Appendix Table 11b. Results for Matched HF Pairs                                                          | 48   |
| Appendix Table 11c. Results for Matched PNA Pairs                                                         | 50   |
| Appendix Table 12. Combined AMI, HF, PNA Value Estimates                                                  | 52   |
| Appendix Table 12a. AMI Value Estimates                                                                   | 54   |
| Appendix Table 12b. HF Value Estimates                                                                    | 56   |
| Appendix Table 12c. PNA Value Estimates                                                                   | 58   |
| Appendix Table 13. Comparison of Cost and Payment Results With and Without Post-Acute-Care (PAC) Payments | 60   |
| REFERENCES                                                                                                | 61   |

## Appendix Table 1. Sample Selection and Study Exclusions

We scanned all index admissions from July 1, 2012 through November 30, 2014 for a relevant ICD-9 principal diagnosis codes for AMI, HF, or Pneumonia.

| <b>Exclusion Step</b>                                                                                                                       | <b>Admissions<br/>(N)</b> | <b>Remaining<br/>Admissions<br/>after Step<br/>(N)</b> | <b>Percent<br/>Remaining</b> |
|---------------------------------------------------------------------------------------------------------------------------------------------|---------------------------|--------------------------------------------------------|------------------------------|
| All index admissions with a qualifying principal diagnosis or procedure                                                                     | 3,382,751                 | --                                                     | 100.0%                       |
| Excluded due to missing DOB or sex                                                                                                          | 0                         | 3,382,751                                              | 100.0%                       |
| Excluded due to age below 65.5                                                                                                              | 544,980                   | 2,837,771                                              | 83.9%                        |
| Excluded due to invalid admission date                                                                                                      | 50,576                    | 2,787,195                                              | 82.4%                        |
| Excluded due to outside of 50 states and DC                                                                                                 | 189,933                   | 2,597,262                                              | 76.8%                        |
| Excluded admissions to hospitals not participating in Medicare IPPS                                                                         | 2,419                     | 2,594,843                                              | 76.7%                        |
| Excluded due to hospice--index claim indicator                                                                                              | 285                       | 2,594,558                                              | 76.7%                        |
| Excluded admissions to hospitals without valid HCRIS data                                                                                   | 17,525                    | 2,577,033                                              | 76.2%                        |
| Excluded due to admission from hospice, or evidence of hospice care in the past six months                                                  | 32,685                    | 2,544,348                                              | 75.2%                        |
| Excluded due to missing MBSF file                                                                                                           | 136                       | 2,544,212                                              | 75.2%                        |
| Excluded due to HMO enrollment or incomplete Part B enrollment in the 6 months prior to admission or palliative care in the past six months | 157,376                   | 2,386,836                                              | 70.6%                        |
| Final hospital assignment had invalid or no HCRIS data and was not an ineligible hospital                                                   | 11,125                    | 2,375,711                                              | 70.2%                        |
| Index admissions after all rounds of exclusions                                                                                             |                           | 2,375,711                                              | 70.2%                        |

Following these exclusions, we selected a random admission for each patient during the study period.

| <b>Exclusion Step</b>             | <b>AMI</b> | <b>HF</b> | <b>PNA</b> | <b>Total</b> |
|-----------------------------------|------------|-----------|------------|--------------|
| All qualifying admissions         | 472,949    | 991,325   | 911,354    | 2,375,628    |
| One medical admission per patient | 387,642    | 620,505   | 725,081    | 1,733,228    |
| Ninety percent sample selection   | 348,875    | 558,455   | 652,573    | 1,559,903    |

**Appendix Table 2. ICD-9 Principal Diagnoses for Medical Conditions**

| Principal Diagnosis Category   | ICD9                                                | ICD9 Label                                                                                                                                              |
|--------------------------------|-----------------------------------------------------|---------------------------------------------------------------------------------------------------------------------------------------------------------|
| <b>AMI</b>                     |                                                     |                                                                                                                                                         |
| Anterior STEMI                 | 410.00                                              | Acute myocardial infarction of anterolateral wall, episode of care unspecified                                                                          |
|                                | 410.01                                              | Acute myocardial infarction of anterolateral wall, initial episode of care                                                                              |
|                                | 410.10                                              | Acute myocardial infarction of other anterior wall, episode of care unspecified                                                                         |
|                                | 410.11                                              | Acute myocardial infarction of other anterior wall, initial episode of care                                                                             |
| Other Location STEMI           | 410.20                                              | Acute myocardial infarction of inferolateral wall, episode of care unspecified                                                                          |
|                                | 410.21                                              | Acute myocardial infarction of inferolateral wall, initial episode of care                                                                              |
|                                | 410.30                                              | Acute myocardial infarction of inferoposterior wall, episode of care unspecified                                                                        |
|                                | 410.31                                              | Acute myocardial infarction of inferoposterior wall, initial episode of care                                                                            |
|                                | 410.40                                              | Acute myocardial infarction of other inferior wall, episode of care unspecified                                                                         |
|                                | 410.41                                              | Acute myocardial infarction of other inferior wall, initial episode of care                                                                             |
|                                | 410.50                                              | Acute myocardial infarction of other lateral wall, episode of care unspecified                                                                          |
|                                | 410.51                                              | Acute myocardial infarction of other lateral wall, initial episode of care                                                                              |
|                                | 410.60                                              | True posterior wall infarction, episode of care unspecified                                                                                             |
|                                | 410.61                                              | True posterior wall infarction, initial episode of care                                                                                                 |
| NSTEMI or Unspecified MI       | 410.70                                              | Subendocardial infarction, episode of care unspecified                                                                                                  |
|                                | 410.71                                              | Subendocardial infarction, initial episode of care                                                                                                      |
|                                | 410.80                                              | Acute myocardial infarction of other specified sites, episode of care unspecified                                                                       |
|                                | 410.81                                              | Acute myocardial infarction of other specified sites, initial episode of care                                                                           |
|                                | 410.90                                              | Acute myocardial infarction of unspecified site, episode of care unspecified                                                                            |
|                                | 410.91                                              | Acute myocardial infarction of unspecified site, initial episode of care                                                                                |
| <b>HF</b>                      |                                                     |                                                                                                                                                         |
| HF with Chronic Kidney Disease | 404.01                                              | Hypertensive heart and chronic kidney disease, malignant, with heart failure and with chronic kidney disease stage I through stage IV, or unspecified   |
|                                | 404.03                                              | Hypertensive heart and chronic kidney disease, malignant, with heart failure and with chronic kidney disease stage V or end stage renal disease         |
|                                | 404.11                                              | Hypertensive heart and chronic kidney disease, benign, with heart failure and with chronic kidney disease stage I through stage IV, or unspecified      |
|                                | 404.13                                              | Hypertensive heart and chronic kidney disease, benign, with heart failure and chronic kidney disease stage V or end stage renal disease                 |
|                                | 404.91                                              | Hypertensive heart and chronic kidney disease, unspecified, with heart failure and with chronic kidney disease stage I through stage IV, or unspecified |
|                                | 404.93                                              | Hypertensive heart and chronic kidney disease, unspecified, with heart failure and chronic kidney disease stage V or end stage renal disease            |
| HF with Hypertension           | 402.01                                              | Malignant hypertensive heart disease with heart failure                                                                                                 |
|                                | 402.11                                              | Benign hypertensive heart disease with heart failure                                                                                                    |
|                                | 402.91                                              | Unspecified hypertensive heart disease with heart failure                                                                                               |
| HF, Other                      | 428.0                                               | Congestive heart failure, unspecified                                                                                                                   |
|                                | 428.1                                               | Left heart failure                                                                                                                                      |
|                                | 428.2                                               | Systolic heart failure                                                                                                                                  |
|                                | 428.20                                              | Systolic heart failure, unspecified                                                                                                                     |
|                                | 428.21                                              | Acute systolic heart failure                                                                                                                            |
|                                | 428.22                                              | Chronic systolic heart failure                                                                                                                          |
|                                | 428.23                                              | Acute on chronic systolic heart failure                                                                                                                 |
|                                | 428.3                                               | Diastolic heart failure                                                                                                                                 |
|                                | 428.30                                              | Diastolic heart failure, unspecified                                                                                                                    |
|                                | 428.31                                              | Acute diastolic heart failure                                                                                                                           |
|                                | 428.32                                              | Chronic diastolic heart failure                                                                                                                         |
|                                | 428.33                                              | Acute on chronic diastolic heart failure                                                                                                                |
|                                | 428.4                                               | Combined systolic and diastolic heart failure                                                                                                           |
|                                | 428.40                                              | Combined systolic and diastolic heart failure, unspecified                                                                                              |
| 428.41                         | Acute combined systolic and diastolic heart failure |                                                                                                                                                         |

| Principal Diagnosis Category                         | ICD9                                                                                | ICD9 Label                                                                                                                                                                                                                                                                                                                                                                                                                       |
|------------------------------------------------------|-------------------------------------------------------------------------------------|----------------------------------------------------------------------------------------------------------------------------------------------------------------------------------------------------------------------------------------------------------------------------------------------------------------------------------------------------------------------------------------------------------------------------------|
|                                                      | 428.42                                                                              | Chronic combined systolic and diastolic heart failure                                                                                                                                                                                                                                                                                                                                                                            |
|                                                      | 428.43                                                                              | Acute on chronic combined systolic and diastolic heart failure                                                                                                                                                                                                                                                                                                                                                                   |
|                                                      | 428.9                                                                               | Heart failure, unspecified                                                                                                                                                                                                                                                                                                                                                                                                       |
| <b>Pneumonia</b>                                     |                                                                                     |                                                                                                                                                                                                                                                                                                                                                                                                                                  |
| Aspiration Pneumonia                                 | 507.0                                                                               | Pneumonitis due to inhalation of food or vomitus                                                                                                                                                                                                                                                                                                                                                                                 |
| Legionnaire's Disease                                | 482.84                                                                              | Pneumonia due to legionnaires' disease                                                                                                                                                                                                                                                                                                                                                                                           |
| Pneumococcal Pneumonia                               | 481                                                                                 | Pneumococcal pneumonia (streptococcus pneumoniae pneumonia)                                                                                                                                                                                                                                                                                                                                                                      |
| Pneumonia Due to Anaerobes or Gram-Negative Bacteria | 482<br>482.0<br>482.81<br>482.82<br>482.83                                          | Pneumonia due to klebsiella pneumoniae<br>Pneumonia due to klebsiella pneumoniae<br>Pneumonia due to anaerobes<br>Pneumonia due to escherichia coli (e.coli)<br>Pneumonia due to other gram-negative bacteria                                                                                                                                                                                                                    |
| Pneumonia Due to MRSA                                | 482.41<br>482.42                                                                    | Pneumonia due to staphylococcus aureus<br>Methicillin resistant pneumonia due to Staphylococcus aureus                                                                                                                                                                                                                                                                                                                           |
| Pneumonia Due to Pseudomonas                         | 482.1                                                                               | Pneumonia due to pseudomonas                                                                                                                                                                                                                                                                                                                                                                                                     |
| Pneumonia, Other                                     | 483<br>485<br>486<br>482.9<br>483.0<br>483.1<br>483.8<br>482.89                     | Pneumonia due to mycoplasma pneumoniae<br>Bronchopneumonia organism unspecified<br>Pneumonia organism unspecified<br>Bacterial pneumonia unspecified<br>Pneumonia due to mycoplasma pneumoniae<br>Pneumonia due to chlamydia<br>Pneumonia due to other specified organism<br>Pneumonia due to other specified bacteria                                                                                                           |
| Pneumonia Due to H. Influenza                        | 482.2                                                                               | Pneumonia due to hemophilus influenzae (h. influenzae)                                                                                                                                                                                                                                                                                                                                                                           |
| Staphylococcal Pneumonia                             | 482.4<br>482.40<br>482.49                                                           | Pneumonia due to staphylococcus unspecified<br>Pneumonia due to staphylococcus unspecified<br>Other staphylococcus pneumonia                                                                                                                                                                                                                                                                                                     |
| Streptococcal Pneumonia                              | 482.3<br>482.30<br>482.31<br>482.32<br>482.39                                       | Pneumonia due to streptococcus unspecified<br>Pneumonia due to streptococcus unspecified<br>Pneumonia due to streptococcus group a<br>Pneumonia due to streptococcus group b<br>Pneumonia due to other streptococcus                                                                                                                                                                                                             |
| Viral Pneumonia                                      | 480<br>487<br>480.0<br>480.1<br>480.2<br>480.3<br>480.8<br>480.9<br>487.0<br>488.11 | Viral Pneumonia<br>Influenza with pneumonia<br>Pneumonia due to adenovirus<br>Pneumonia due to respiratory syncytial virus<br>Pneumonia due to parainfluenza virus<br>Pneumonia due to SARS-associated coronavirus<br>Viral pneumonia: pneumonia due to other virus not elsewhere classified<br>Viral pneumonia unspecified<br>Influenza with pneumonia<br>Influenza due to identified novel H1N1 influenza virus with pneumonia |

**Appendix Table 3. Characteristics of Randomly Split 90% Matching and 10% Risk Model Samples**

| <b>Covariate (% unless noted)</b>                                                                                                                                                                                                                                                                      | <b>90% Sample</b> | <b>10% Sample</b> |
|--------------------------------------------------------------------------------------------------------------------------------------------------------------------------------------------------------------------------------------------------------------------------------------------------------|-------------------|-------------------|
| N Patients                                                                                                                                                                                                                                                                                             | 1,159,903         | 173,325           |
| Age (years, mean)                                                                                                                                                                                                                                                                                      | 80.17             | 80.09             |
| Age 65-69                                                                                                                                                                                                                                                                                              | 13.47             | 13.70             |
| Age 70-74                                                                                                                                                                                                                                                                                              | 16.01             | 16.08             |
| Age 75-79                                                                                                                                                                                                                                                                                              | 17.32             | 17.39             |
| Age 80-84                                                                                                                                                                                                                                                                                              | 19.19             | 19.14             |
| Age 85+                                                                                                                                                                                                                                                                                                | 34.01             | 33.69             |
| Sex (male)                                                                                                                                                                                                                                                                                             | 47.47             | 47.52             |
| Race- White                                                                                                                                                                                                                                                                                            | 83.30             | 83.44             |
| Race- Black                                                                                                                                                                                                                                                                                            | 8.84              | 8.77              |
| Race- Hispanic                                                                                                                                                                                                                                                                                         | 4.80              | 4.71              |
| Race- Other                                                                                                                                                                                                                                                                                            | 3.06              | 3.08              |
| Emergent Type Admission                                                                                                                                                                                                                                                                                | 78.37             | 78.52             |
| Treatment at another hospital's ED                                                                                                                                                                                                                                                                     | 0.09              | 0.08              |
| Prior Dialysis Visit                                                                                                                                                                                                                                                                                   | 0.69              | 0.67              |
| Region* Northeast                                                                                                                                                                                                                                                                                      | 26.47             | 26.43             |
| Region* Midwest                                                                                                                                                                                                                                                                                        | 24.26             | 24.31             |
| Region* Pacific                                                                                                                                                                                                                                                                                        | 9.66              | 9.57              |
| Region* South                                                                                                                                                                                                                                                                                          | 35.14             | 35.15             |
| Region* Rockies                                                                                                                                                                                                                                                                                        | 4.47              | 4.54              |
| <b>Principal Diagnoses</b>                                                                                                                                                                                                                                                                             |                   |                   |
| AMI                                                                                                                                                                                                                                                                                                    | 22.37             | 22.37             |
| HF                                                                                                                                                                                                                                                                                                     | 35.80             | 35.80             |
| PNA                                                                                                                                                                                                                                                                                                    | 41.83             | 41.83             |
| <b>Comorbidities</b>                                                                                                                                                                                                                                                                                   |                   |                   |
| Heart Failure                                                                                                                                                                                                                                                                                          | 40.63             | 40.55             |
| Myocardial Infarction                                                                                                                                                                                                                                                                                  | 4.89              | 4.96              |
| Unstable Angina                                                                                                                                                                                                                                                                                        | 6.87              | 6.86              |
| Cardio-respiratory Failure or Shock                                                                                                                                                                                                                                                                    | 16.45             | 16.49             |
| Valvular Heart Disease                                                                                                                                                                                                                                                                                 | 34.58             | 34.61             |
| Hypertension                                                                                                                                                                                                                                                                                           | 89.29             | 89.30             |
| Stroke                                                                                                                                                                                                                                                                                                 | 8.07              | 8.06              |
| Cerebrovascular Disease                                                                                                                                                                                                                                                                                | 17.92             | 17.92             |
| Renal Failure                                                                                                                                                                                                                                                                                          | 29.30             | 29.13             |
| COPD                                                                                                                                                                                                                                                                                                   | 53.90             | 53.75             |
| Pneumonia; pleural effusion/pneumothorax                                                                                                                                                                                                                                                               | 9.65              | 9.66              |
| Diabetes                                                                                                                                                                                                                                                                                               | 45.80             | 45.83             |
| Malnutrition                                                                                                                                                                                                                                                                                           | 10.08             | 9.96              |
| Dementia or other specified brain disorders                                                                                                                                                                                                                                                            | 26.95             | 26.71             |
| Hemiplegia, paraplegia, paralysis, functional disability                                                                                                                                                                                                                                               | 7.77              | 7.70              |
| Vascular disease and complications                                                                                                                                                                                                                                                                     | 29.27             | 29.11             |
| Cancer                                                                                                                                                                                                                                                                                                 | 6.19              | 6.14              |
| Trauma; other injuries                                                                                                                                                                                                                                                                                 | 30.21             | 30.10             |
| Major psychiatric disorders                                                                                                                                                                                                                                                                            | 11.59             | 11.66             |
| Chronic Liver Disease                                                                                                                                                                                                                                                                                  | 2.14              | 2.11              |
| Severe hematological disorders                                                                                                                                                                                                                                                                         | 1.86              | 1.87              |
| Iron deficiency or other/unspecified anemias and blood disease                                                                                                                                                                                                                                         | 54.47             | 54.29             |
| Depression                                                                                                                                                                                                                                                                                             | 20.14             | 20.22             |
| Parkinson's and Huntington's diseases                                                                                                                                                                                                                                                                  | 3.45              | 3.50              |
| Seizure disorders and convulsions                                                                                                                                                                                                                                                                      | 4.74              | 4.65              |
| Fibrosis of lung or other chronic lung disorders                                                                                                                                                                                                                                                       | 43.11             | 43.35             |
| Asthma                                                                                                                                                                                                                                                                                                 | 8.88              | 8.88              |
| *Regions: <b>Northeast:</b> CT, DC, DE, MA, MD, ME, NH, NJ, NY, PA, RI, VA, VT; <b>Midwest:</b> IA, IL, IN, KS, KY, MI, MN, MO, NE, ND, OH, SD, WI; <b>South:</b> AL, AR, FL, GA, LA, MS, NC, OK, SC, TN, TX, WV; <b>Rockies:</b> AZ, CO, ID, MT, NM, NV, UT, WY; <b>Pacific:</b> AK, CA, HI, OR, WA s |                   |                   |

**Appendix Table 4. AMI Risk Models** All AMI risk models are based on a 10% random sample of patients admitted nationwide (N=38,767).

**Appendix Table 4a. AMI Risk Model for 30-Day Mortality** The risk model for 30-day mortality in AMI was estimated from a 10% random sample of AMI patients treated nationwide (N=38,767), using binary logistic regression (c=0.75).

| Variable                                                       | Odds Ratio    |                   | Chi Sq | P      |
|----------------------------------------------------------------|---------------|-------------------|--------|--------|
|                                                                | Estimate (SE) | (95% CI)          |        |        |
| Intercept                                                      | -3.40 (0.08)  | 0.00 (0.00, 0.00) | 1673.4 | <.0001 |
| <i>Patient Demographics</i>                                    |               |                   |        |        |
| Age 65-69 (reference)                                          | --            | --                | --     | --     |
| Age 70-74                                                      | 0.14 (0.07)   | 1.15 (1.00, 1.31) | 4.0    | 0.05   |
| Age 75-79                                                      | 0.42 (0.07)   | 1.52 (1.34, 1.73) | 40.8   | <.0001 |
| Age 80-84                                                      | 0.78 (0.06)   | 2.18 (1.93, 2.47) | 151.6  | <.0001 |
| Age 85+                                                        | 1.25 (0.06)   | 3.51 (3.12, 3.94) | 438.1  | <.0001 |
| Sex (male)                                                     | 0.11 (0.03)   | 1.11 (1.04, 1.19) | 9.6    | <.01   |
| <i>Race- White (reference)</i>                                 |               |                   |        |        |
| Race- Black                                                    | -0.15 (0.07)  | 0.86 (0.75, 0.98) | 5.0    | 0.03   |
| Race- Hispanic                                                 | -0.06 (0.08)  | 0.94 (0.80, 1.10) | 0.6    | 0.45   |
| Race- Other                                                    | 0.19 (0.09)   | 1.21 (1.02, 1.44) | 4.8    | 0.03   |
| Emergent Type Admission                                        | 0.15 (0.04)   | 1.16 (1.07, 1.25) | 12.8   | <.001  |
| Treatment at another hospital's ED                             | -0.68 (0.40)  | 0.51 (0.23, 1.11) | 2.9    | 0.09   |
| Prior Dialysis Visit                                           | 0.68 (0.17)   | 1.98 (1.42, 2.74) | 16.5   | <.0001 |
| <i>Principal Diagnoses</i>                                     |               |                   |        |        |
| STEMI Type 1                                                   | 0.90 (0.05)   | 2.46 (2.21, 2.73) | 287.1  | <.0001 |
| STEMI Type 2                                                   | 0.53 (0.05)   | 1.71 (1.55, 1.88) | 113.6  | <.0001 |
| NSTEMI or unspecified MI (reference)                           | --            | --                | --     | --     |
| <i>Comorbidities</i>                                           |               |                   |        |        |
| History of PTCA                                                | -0.28 (0.07)  | 0.76 (0.66, 0.86) | 16.7   | <.0001 |
| History of CABG                                                | -0.05 (0.06)  | 0.95 (0.84, 1.07) | 0.7    | 0.40   |
| Heart Failure                                                  | 0.20 (0.04)   | 1.22 (1.12, 1.32) | 22.8   | <.0001 |
| Myocardial Infarction                                          | -0.27 (0.05)  | 0.76 (0.69, 0.85) | 26.1   | <.0001 |
| Unstable Angina                                                | -0.18 (0.06)  | 0.84 (0.75, 0.93) | 10.5   | <.01   |
| Cardio-respiratory Failure or Shock                            | 0.42 (0.06)   | 1.52 (1.37, 1.70) | 57.2   | <.0001 |
| Valvular Heart Disease                                         | 0.09 (0.04)   | 1.10 (1.03, 1.18) | 7.1    | <.01   |
| Hypertension                                                   | -0.32 (0.05)  | 0.73 (0.66, 0.81) | 35.7   | <.0001 |
| Stroke                                                         | -0.03 (0.07)  | 0.97 (0.85, 1.11) | 0.2    | 0.66   |
| Cerebrovascular Disease                                        | -0.04 (0.05)  | 0.96 (0.88, 1.05) | 0.8    | 0.38   |
| Renal Failure                                                  | 0.10 (0.04)   | 1.10 (1.02, 1.20) | 5.6    | 0.02   |
| COPD                                                           | 0.18 (0.04)   | 1.19 (1.11, 1.29) | 22.7   | <.0001 |
| Pneumonia; pleural effusion/pneumothorax                       | 0.73 (0.04)   | 2.07 (1.93, 2.23) | 382.0  | <.0001 |
| Diabetes                                                       | 0.13 (0.03)   | 1.14 (1.07, 1.22) | 14.8   | <.001  |
| Malnutrition                                                   | 0.58 (0.06)   | 1.78 (1.58, 2.00) | 95.3   | <.0001 |
| Dementia or other specified brain disorders                    | 0.49 (0.04)   | 1.63 (1.51, 1.77) | 146.7  | <.0001 |
| Hemiplegia, paraplegia, paralysis, functional disability       | 0.24 (0.07)   | 1.27 (1.11, 1.45) | 11.8   | <.001  |
| Vascular disease and complications                             | 0.09 (0.04)   | 1.09 (1.01, 1.18) | 4.9    | 0.03   |
| Cancer                                                         | 0.60 (0.07)   | 1.82 (1.57, 2.10) | 65.7   | <.0001 |
| Trauma; other injuries                                         | 0.08 (0.04)   | 1.08 (1.00, 1.16) | 4.0    | 0.04   |
| Major psychiatric disorders                                    | 0.12 (0.06)   | 1.13 (1.00, 1.26) | 4.1    | 0.04   |
| Chronic Liver Disease                                          | 0.36 (0.13)   | 1.43 (1.12, 1.83) | 7.9    | <.01   |
| Severe hematological disorders                                 | 0.03 (0.14)   | 1.03 (0.78, 1.37) | 0.1    | 0.82   |
| Iron deficiency or other/unspecified anemias and blood disease | 0.16 (0.04)   | 1.17 (1.09, 1.26) | 19.7   | <.0001 |
| Depression                                                     | -0.01 (0.05)  | 0.99 (0.90, 1.08) | 0.1    | 0.77   |
| Parkinson's and Huntington's diseases                          | 0.07 (0.10)   | 1.07 (0.88, 1.30) | 0.4    | 0.52   |
| Seizure disorders and convulsions                              | 0.49 (0.08)   | 1.64 (1.41, 1.90) | 40.9   | <.0001 |
| Fibrosis of lung or other chronic lung disorders               | 0.13 (0.07)   | 1.14 (1.00, 1.30) | 3.7    | 0.05   |
| Asthma                                                         | -0.27 (0.08)  | 0.76 (0.66, 0.88) | 13.2   | <.001  |

**Appendix Table 4b. AMI Risk Model for ICU or Intermediate Care Utilization** The risk model for predicted ICU utilization in AMI was estimated from a 10% random sample of AMI patients treated nationwide (N=38,767), using binary logistic regression (c=0.64).

| Variable                                                       | Estimate (SE) | Odds Ratio<br>(95% CI) | Chi Sq | P      |
|----------------------------------------------------------------|---------------|------------------------|--------|--------|
| Intercept                                                      | 1.04 (0.06)   | 0.00 (0.00, 0.00)      | 333.7  | <.0001 |
| <i>Patient Demographics</i>                                    |               |                        |        |        |
| Age 65-69 (reference)                                          | --            | --                     | --     | --     |
| Age 70-74                                                      | -0.04 (0.04)  | 0.96 (0.89, 1.05)      | 0.8    | 0.37   |
| Age 75-79                                                      | -0.04 (0.04)  | 0.96 (0.89, 1.04)      | 0.9    | 0.35   |
| Age 80-84                                                      | -0.12 (0.04)  | 0.89 (0.82, 0.96)      | 8.1    | <.01   |
| Age 85+                                                        | -0.43 (0.04)  | 0.65 (0.60, 0.70)      | 118.3  | <.0001 |
| Sex (male)                                                     | 0.10 (0.03)   | 1.11 (1.06, 1.17)      | 17.4   | <.0001 |
| Race- White (reference)                                        | --            | --                     | --     | --     |
| Race- Black                                                    | -0.05 (0.05)  | 0.95 (0.87, 1.04)      | 1.2    | 0.27   |
| Race- Hispanic                                                 | 0.26 (0.06)   | 1.30 (1.15, 1.46)      | 17.8   | <.0001 |
| Race- Other                                                    | 0.18 (0.07)   | 1.20 (1.04, 1.38)      | 6.5    | 0.01   |
| Emergent Type Admission                                        | -0.07 (0.03)  | 0.94 (0.88, 0.99)      | 5.3    | 0.02   |
| Treatment at another hospital's ED                             | -0.26 (0.22)  | 0.78 (0.51, 1.18)      | 1.4    | 0.24   |
| Prior Dialysis Visit                                           | -0.09 (0.15)  | 0.92 (0.68, 1.23)      | 0.3    | 0.56   |
| <i>Principal Diagnoses</i>                                     |               |                        |        |        |
| STEMI Type 1                                                   | 1.18 (0.06)   | 3.24 (2.88, 3.64)      | 386.5  | <.0001 |
| STEMI Type 2                                                   | 1.09 (0.05)   | 2.96 (2.70, 3.25)      | 521.2  | <.0001 |
| NSTEMI or unspecified MI (reference)                           | --            | --                     | --     | --     |
| <i>Comorbidities</i>                                           |               |                        |        |        |
| History of PTCA                                                | 0.00 (0.05)   | 1.00 (0.91, 1.10)      | 0.0    | 1.00   |
| History of CABG                                                | -0.18 (0.04)  | 0.83 (0.76, 0.91)      | 16.9   | <.0001 |
| Heart Failure                                                  | -0.04 (0.03)  | 0.96 (0.90, 1.02)      | 1.5    | 0.22   |
| Myocardial Infarction                                          | -0.29 (0.04)  | 0.75 (0.70, 0.80)      | 66.4   | <.0001 |
| Unstable Angina                                                | -0.02 (0.04)  | 0.98 (0.91, 1.05)      | 0.3    | 0.57   |
| Cardio-respiratory Failure or Shock                            | 0.19 (0.05)   | 1.21 (1.10, 1.34)      | 14.6   | <.001  |
| Valvular Heart Disease                                         | 0.16 (0.03)   | 1.18 (1.12, 1.24)      | 35.9   | <.0001 |
| Hypertension                                                   | -0.03 (0.04)  | 0.97 (0.89, 1.05)      | 0.6    | 0.46   |
| Stroke                                                         | -0.03 (0.06)  | 0.97 (0.87, 1.08)      | 0.4    | 0.54   |
| Cerebrovascular Disease                                        | 0.04 (0.04)   | 1.04 (0.97, 1.12)      | 1.4    | 0.24   |
| Renal Failure                                                  | -0.07 (0.03)  | 0.94 (0.88, 1.00)      | 4.1    | 0.04   |
| COPD                                                           | 0.05 (0.03)   | 1.05 (0.99, 1.11)      | 2.6    | 0.10   |
| Pneumonia; pleural effusion/pneumothorax                       | 0.22 (0.03)   | 1.24 (1.17, 1.33)      | 44.1   | <.0001 |
| Diabetes                                                       | 0.03 (0.03)   | 1.03 (0.98, 1.09)      | 1.8    | 0.18   |
| Malnutrition                                                   | 0.06 (0.06)   | 1.06 (0.95, 1.19)      | 1.2    | 0.28   |
| Dementia or other specified brain disorders                    | -0.25 (0.03)  | 0.78 (0.73, 0.83)      | 54.6   | <.0001 |
| Hemiplegia, paraplegia, paralysis, functional disability       | -0.10 (0.06)  | 0.91 (0.81, 1.02)      | 2.9    | 0.09   |
| Vascular disease and complications                             | -0.06 (0.03)  | 0.94 (0.88, 1.00)      | 4.3    | 0.04   |
| Cancer                                                         | -0.20 (0.07)  | 0.82 (0.72, 0.93)      | 9.6    | <.01   |
| Trauma; other injuries                                         | -0.06 (0.03)  | 0.95 (0.89, 1.00)      | 3.6    | 0.06   |
| Major psychiatric disorders                                    | -0.05 (0.05)  | 0.95 (0.87, 1.05)      | 1.0    | 0.31   |
| Chronic Liver Disease                                          | 0.02 (0.11)   | 1.02 (0.82, 1.26)      | 0.0    | 0.87   |
| Severe hematological disorders                                 | -0.14 (0.12)  | 0.87 (0.69, 1.10)      | 1.3    | 0.26   |
| Iron deficiency or other/unspecified anemias and blood disease | 0.29 (0.03)   | 1.34 (1.27, 1.41)      | 118.1  | <.0001 |
| Depression                                                     | -0.13 (0.03)  | 0.88 (0.82, 0.94)      | 13.5   | <.001  |
| Parkinson's and Huntington's diseases                          | -0.13 (0.08)  | 0.88 (0.75, 1.03)      | 2.5    | 0.11   |
| Seizure disorders and convulsions                              | 0.14 (0.07)   | 1.15 (1.00, 1.32)      | 3.8    | 0.05   |
| Fibrosis of lung or other chronic lung disorders               | 0.03 (0.06)   | 1.03 (0.92, 1.15)      | 0.2    | 0.64   |
| Asthma                                                         | -0.07 (0.05)  | 0.93 (0.84, 1.03)      | 2.1    | 0.15   |

**Appendix Table 4c. AMI Risk Model for Predicted Cost** The risk model for predicted cost in AMI was estimated from a 10% random sample of AMI patients treated nationwide (N=38,767), using robust regression and m-estimation ( $R^2=0.056$ ).

| Variable                                                                                          | Estimate (SE)   | 95% CI           | Chi Sq | P      |
|---------------------------------------------------------------------------------------------------|-----------------|------------------|--------|--------|
| Intercept                                                                                         | 13420.7 (286.9) | 12858.3, 13983.1 | 2187.5 | <.0001 |
| <i>Patient Demographics</i>                                                                       |                 |                  |        |        |
| Age 65-69 (reference)                                                                             | --              | --               | --     | --     |
| Age 70-74                                                                                         | 315.1 (204.0)   | -84.6, 714.9     | 2.4    | 0.12   |
| Age 75-79                                                                                         | 484.3 (207.0)   | 78.6, 889.9      | 5.5    | 0.02   |
| Age 80-84                                                                                         | 265.4 (213.1)   | -152.3, 683.1    | 1.6    | 0.21   |
| Age 85+                                                                                           | -1980.4 (206.6) | -2385.3, -1575.4 | 91.9   | <.0001 |
| Sex (male)                                                                                        | 714.7 (130.7)   | 458.5, 970.9     | 29.9   | <.0001 |
| Race- White (reference)                                                                           | --              | --               | --     | --     |
| Race- Black                                                                                       | 425.4 (244.9)   | -54.6, 905.3     | 3.0    | 0.08   |
| Race- Hispanic                                                                                    | 1491.0 (302.0)  | 899.2, 2082.8    | 24.4   | <.0001 |
| Race- Other                                                                                       | 967.1 (351.7)   | 277.8, 1656.3    | 7.6    | <.01   |
| Emergent Type Admission                                                                           | -759.8 (147.4)  | -1048.6, -470.9  | 26.6   | <.0001 |
| Treatment at another hospital's ED                                                                | 289.8 (1129.4)  | -1923.7, 2503.3  | 0.1    | 0.80   |
| Prior Dialysis Visit                                                                              | 618.3 (795.1)   | -940.1, 2176.6   | 0.6    | 0.44   |
| <i>Principal Diagnoses</i>                                                                        |                 |                  |        |        |
| STEMI Type 1                                                                                      | 3184.5 (233.7)  | 2726.5, 3642.5   | 185.7  | <.0001 |
| STEMI Type 2                                                                                      | 1503.0 (193.7)  | 1123.4, 1882.7   | 60.2   | <.0001 |
| NSTEMI or unspecified MI (reference)                                                              | --              | --               | --     | --     |
| <i>Comorbidities</i>                                                                              |                 |                  |        |        |
| History of PTCA                                                                                   | -1262.2 (249.0) | -1750.2, -774.2  | 25.7   | <.0001 |
| History of CABG                                                                                   | -1825.7 (244.5) | -2304.9, -1346.5 | 55.8   | <.0001 |
| Heart Failure                                                                                     | -626.5 (171.4)  | -962.4, -290.7   | 13.4   | <.001  |
| Myocardial Infarction                                                                             | -2419.7 (195.9) | -2803.6, -2035.7 | 152.6  | <.0001 |
| Unstable Angina                                                                                   | -1463.9 (202.7) | -1861.2, -1066.6 | 52.2   | <.0001 |
| Cardio-respiratory Failure or Shock                                                               | 325.8 (256.1)   | -176.1, 827.8    | 1.6    | 0.20   |
| Valvular Heart Disease                                                                            | 1903.5 (139.2)  | 1630.6, 2176.3   | 186.9  | <.0001 |
| Hypertension                                                                                      | 283.5 (209.4)   | -127.0, 693.9    | 1.8    | 0.18   |
| Stroke                                                                                            | -74.0 (296.8)   | -655.8, 507.8    | 0.1    | 0.80   |
| Cerebrovascular Disease                                                                           | 517.8 (189.6)   | 146.1, 889.4     | 7.5    | <.01   |
| Renal Failure                                                                                     | -653.9 (173.3)  | -993.5, -314.2   | 14.2   | <.001  |
| COPD                                                                                              | 1188.2 (147.8)  | 898.5, 1477.9    | 64.6   | <.0001 |
| Pneumonia; pleural effusion/pneumothorax                                                          | 4056.0 (167.4)  | 3727.8, 4384.1   | 586.9  | <.0001 |
| Diabetes                                                                                          | 1505.8 (132.0)  | 1247.0, 1764.5   | 130.1  | <.0001 |
| Malnutrition                                                                                      | 4752.2 (295.9)  | 4172.3, 5332.2   | 257.9  | <.0001 |
| Dementia or other specified brain disorders                                                       | -1027.5 (182.6) | -1385.3, -669.6  | 31.7   | <.0001 |
| Hemiplegia, paraplegia, paralysis, functional disability                                          | -1143.9 (315.3) | -1761.8, -525.9  | 13.2   | <.001  |
| Vascular disease and complications                                                                | -232.6 (162.0)  | -550.1, 85.0     | 2.1    | 0.15   |
| Cancer                                                                                            | -1915.1 (347.5) | -2596.2, -1234.0 | 30.4   | <.0001 |
| Trauma; other injuries                                                                            | 225.4 (153.5)   | -75.6, 526.3     | 2.2    | 0.14   |
| Major psychiatric disorders                                                                       | 145.3 (254.7)   | -353.9, 644.5    | 0.3    | 0.57   |
| Chronic Liver Disease                                                                             | 962.5 (554.3)   | -123.9, 2048.9   | 3.0    | 0.08   |
| Severe hematological disorders                                                                    | -1679.4 (641.1) | -2936.0, -422.8  | 6.9    | <.01   |
| Iron deficiency or other/unspecified anemias and blood disease                                    | 5850.0 (137.6)  | 5580.2, 6119.7   | 1807.0 | <.0001 |
| Depression                                                                                        | -929.2 (187.2)  | -1296.1, -562.3  | 24.6   | <.0001 |
| Parkinson's and Huntington's diseases                                                             | -387.6 (443.7)  | -1257.2, 481.9   | 0.8    | 0.38   |
| Seizure disorders and convulsions                                                                 | 1434.5 (362.6)  | 723.8, 2145.3    | 15.7   | <.0001 |
| Fibrosis of lung or other chronic lung disorders                                                  | 83.6 (296.6)    | -497.7, 664.9    | 0.1    | 0.78   |
| Asthma                                                                                            | -183.7 (267.4)  | -707.9, 340.5    | 0.5    | 0.49   |
| *Facility fees for ICU and intermediate care were assigned the same value in the cost risk score. |                 |                  |        |        |



**Appendix Table 4d. AMI Risk Model for Predicted LOS** The risk model for predicted LOS in AMI was estimated from a 10% random sample of AMI patients treated nationwide (N=38,767), using robust regression and m-estimation ( $R^2=0.078$ ).

| Variable                                                       | Estimate (SE) | 95% CI     | Chi Sq | P      |
|----------------------------------------------------------------|---------------|------------|--------|--------|
| Intercept                                                      | 2.9 (0.1)     | 2.8, 3.0   | 2139.2 | <.0001 |
| <i>Patient Demographics</i>                                    |               |            |        |        |
| Age 65-69 (reference)                                          | --            | --         | --     | --     |
| Age 70-74                                                      | 0.1 (0.0)     | 0.0, 0.2   | 2.3    | 0.13   |
| Age 75-79                                                      | 0.1 (0.0)     | 0.0, 0.2   | 9.3    | <.01   |
| Age 80-84                                                      | 0.2 (0.0)     | 0.1, 0.3   | 19.4   | <.0001 |
| Age 85+                                                        | 0.0 (0.0)     | -0.1, 0.1  | 0.6    | 0.46   |
| Sex (male)                                                     | 0.0 (0.0)     | 0.0, 0.1   | 1.9    | 0.16   |
| Race- White (reference)                                        | --            | --         | --     | --     |
| Race- Black                                                    | 0.2 (0.1)     | 0.1, 0.3   | 15.3   | <.0001 |
| Race- Hispanic                                                 | 0.2 (0.1)     | 0.0, 0.3   | 5.7    | 0.02   |
| Race- Other                                                    | 0.0 (0.1)     | -0.1, 0.2  | 0.4    | 0.52   |
| Emergent Type Admission                                        | -0.3 (0.0)    | -0.3, -0.2 | 66.3   | <.0001 |
| Treatment at another hospital's ED                             | -0.2 (0.2)    | -0.6, 0.3  | 0.4    | 0.53   |
| Prior Dialysis Visit                                           | 0.1 (0.2)     | -0.2, 0.4  | 0.4    | 0.55   |
| <i>Principal Diagnoses</i>                                     |               |            |        |        |
| STEMI Type 1                                                   | 0.3 (0.1)     | 0.2, 0.4   | 40.0   | <.0001 |
| STEMI Type 2                                                   | -0.1 (0.0)    | -0.1, 0.0  | 2.1    | 0.15   |
| NSTEMI or unspecified MI (reference)                           | --            | --         | --     | --     |
| <i>Comorbidities</i>                                           |               |            |        |        |
| History of PTCA                                                | -0.3 (0.1)    | -0.4, -0.2 | 38.1   | <.0001 |
| History of CABG                                                | -0.3 (0.1)    | -0.4, -0.2 | 34.0   | <.0001 |
| Heart Failure                                                  | 0.0 (0.0)     | -0.1, 0.1  | 0.4    | 0.53   |
| Myocardial Infarction                                          | -0.4 (0.0)    | -0.4, -0.3 | 67.9   | <.0001 |
| Unstable Angina                                                | -0.3 (0.0)    | -0.4, -0.2 | 43.5   | <.0001 |
| Cardio-respiratory Failure or Shock                            | 0.2 (0.1)     | 0.1, 0.3   | 8.7    | <.01   |
| Valvular Heart Disease                                         | 0.4 (0.0)     | 0.3, 0.5   | 172.1  | <.0001 |
| Hypertension                                                   | 0.0 (0.0)     | -0.1, 0.1  | 0.4    | 0.53   |
| Stroke                                                         | 0.0 (0.1)     | -0.2, 0.1  | 0.4    | 0.53   |
| Cerebrovascular Disease                                        | 0.1 (0.0)     | 0.0, 0.2   | 7.8    | <.01   |
| Renal Failure                                                  | 0.0 (0.0)     | -0.1, 0.1  | 0.3    | 0.59   |
| COPD                                                           | 0.3 (0.0)     | 0.3, 0.4   | 101.6  | <.0001 |
| Pneumonia; pleural effusion/pneumothorax                       | 1.1 (0.0)     | 1.0, 1.2   | 917.9  | <.0001 |
| Diabetes                                                       | 0.3 (0.0)     | 0.3, 0.4   | 143.1  | <.0001 |
| Malnutrition                                                   | 1.4 (0.1)     | 1.3, 1.6   | 486.0  | <.0001 |
| Dementia or other specified brain disorders                    | 0.1 (0.0)     | 0.0, 0.1   | 2.6    | 0.11   |
| Hemiplegia, paraplegia, paralysis, functional disability       | -0.1 (0.1)    | -0.3, 0.0  | 4.6    | 0.03   |
| Vascular disease and complications                             | 0.0 (0.0)     | 0.0, 0.1   | 1.5    | 0.22   |
| Cancer                                                         | -0.2 (0.1)    | -0.4, -0.1 | 9.1    | <.01   |
| Trauma; other injuries                                         | 0.1 (0.0)     | 0.1, 0.2   | 16.1   | <.0001 |
| Major psychiatric disorders                                    | 0.2 (0.1)     | 0.1, 0.3   | 9.0    | <.01   |
| Chronic Liver Disease                                          | 0.4 (0.1)     | 0.2, 0.7   | 12.2   | <.001  |
| Severe hematological disorders                                 | -0.2 (0.1)    | -0.4, 0.1  | 1.4    | 0.24   |
| Iron deficiency or other/unspecified anemias and blood disease | 1.3 (0.0)     | 1.3, 1.4   | 1900.8 | <.0001 |
| Depression                                                     | -0.1 (0.0)    | -0.2, 0.0  | 3.8    | 0.05   |
| Parkinson's and Huntington's diseases                          | 0.0 (0.1)     | -0.2, 0.2  | 0.0    | 0.91   |
| Seizure disorders and convulsions                              | 0.3 (0.1)     | 0.1, 0.4   | 12.6   | <.001  |
| Fibrosis of lung or other chronic lung disorders               | -0.1 (0.1)    | -0.2, 0.1  | 0.6    | 0.43   |
| Asthma                                                         | 0.0 (0.1)     | -0.1, 0.1  | 0.1    | 0.78   |

**Appendix Table 5. HF Risk Models** All HF risk models are based on a 10% random sample of patients admitted nationwide (N=62,050).

**Appendix Table 5a. HF Risk Model for 30-Day Mortality** The risk model for 30-day mortality in HF was estimated from a 10% random sample of HF patients treated nationwide (N=62,050), using binary logistic regression ( $c=0.71$ ).

| Variable                                                       | Odds Ratio    |                   |        |        |
|----------------------------------------------------------------|---------------|-------------------|--------|--------|
|                                                                | Estimate (SE) | (95% CI)          | Chi Sq | P      |
| Intercept                                                      | -3.35 (0.08)  | 0.00 (0.00, 0.00) | 1695.5 | <.0001 |
| <i>Patient Demographics</i>                                    |               |                   |        |        |
| Age 65-69 (reference)                                          | --            | --                | --     | --     |
| Age 70-74                                                      | 0.09 (0.07)   | 1.10 (0.96, 1.26) | 1.7    | 0.19   |
| Age 75-79                                                      | 0.39 (0.06)   | 1.48 (1.31, 1.68) | 37.1   | <.0001 |
| Age 80-84                                                      | 0.54 (0.06)   | 1.71 (1.51, 1.93) | 73.2   | <.0001 |
| Age 85+                                                        | 1.00 (0.06)   | 2.72 (2.43, 3.05) | 289.2  | <.0001 |
| Sex (male)                                                     | 0.16 (0.03)   | 1.17 (1.11, 1.24) | 29.7   | <.0001 |
| Race- White (reference)                                        | --            | --                | --     | --     |
| Race- Black                                                    | -0.39 (0.05)  | 0.68 (0.61, 0.75) | 53.6   | <.0001 |
| Race- Hispanic                                                 | -0.36 (0.08)  | 0.70 (0.60, 0.81) | 23.0   | <.0001 |
| Race- Other                                                    | -0.24 (0.09)  | 0.79 (0.66, 0.95) | 6.6    | 0.01   |
| Emergent Type Admission                                        | 0.10 (0.04)   | 1.11 (1.04, 1.19) | 8.6    | <.01   |
| Treatment at another hospital's ED                             | 0.44 (0.81)   | 1.56 (0.32, 7.59) | 0.3    | 0.58   |
| Prior Dialysis Visit                                           | 0.55 (0.14)   | 1.74 (1.32, 2.30) | 15.3   | <.0001 |
| <i>Principal Diagnoses</i>                                     |               |                   |        |        |
| HF with Chronic Kidney Disease                                 | 0.21 (0.06)   | 1.23 (1.09, 1.38) | 11.8   | <.001  |
| HF with Hypertension                                           | -0.47 (0.11)  | 0.63 (0.51, 0.78) | 17.5   | <.0001 |
| HF, other                                                      | --            | --                | --     | --     |
| <i>Comorbidities</i>                                           |               |                   |        |        |
| History of PTCA                                                | -0.09 (0.04)  | 0.92 (0.84, 1.00) | 4.3    | 0.04   |
| History of CABG                                                | 0.11 (0.03)   | 1.12 (1.05, 1.20) | 11.7   | <.001  |
| Heart Failure                                                  | 0.21 (0.07)   | 1.23 (1.07, 1.43) | 7.9    | <.01   |
| Myocardial Infarction                                          | -0.06 (0.06)  | 0.94 (0.84, 1.05) | 1.1    | 0.29   |
| Unstable Angina                                                | 0.27 (0.04)   | 1.31 (1.22, 1.40) | 58.6   | <.0001 |
| Cardio-respiratory Failure or Shock                            | 0.04 (0.03)   | 1.05 (0.99, 1.11) | 2.4    | 0.12   |
| Valvular Heart Disease                                         | -0.46 (0.05)  | 0.63 (0.57, 0.70) | 85.1   | <.0001 |
| Hypertension                                                   | -0.05 (0.05)  | 0.95 (0.86, 1.06) | 0.8    | 0.37   |
| Stroke                                                         | -0.03 (0.04)  | 0.97 (0.90, 1.05) | 0.6    | 0.43   |
| Cerebrovascular Disease                                        | 0.15 (0.03)   | 1.17 (1.10, 1.24) | 23.9   | <.0001 |
| Renal Failure                                                  | 0.15 (0.03)   | 1.16 (1.09, 1.23) | 25.5   | <.0001 |
| COPD                                                           | 0.30 (0.03)   | 1.35 (1.27, 1.43) | 104.8  | <.0001 |
| Pneumonia; pleural effusion/pneumothorax                       | -0.06 (0.03)  | 0.94 (0.89, 1.00) | 4.2    | 0.04   |
| Diabetes                                                       | 0.75 (0.04)   | 2.11 (1.95, 2.28) | 352.7  | <.0001 |
| Malnutrition                                                   | 0.41 (0.03)   | 1.51 (1.42, 1.61) | 161.8  | <.0001 |
| Dementia or other specified brain disorders                    | 0.20 (0.05)   | 1.22 (1.10, 1.35) | 14.8   | <.001  |
| Hemiplegia, paraplegia, paralysis, functional disability       | 0.08 (0.03)   | 1.08 (1.02, 1.14) | 6.2    | 0.01   |
| Vascular disease and complications                             | 0.71 (0.06)   | 2.04 (1.83, 2.27) | 164.9  | <.0001 |
| Cancer                                                         | 0.18 (0.03)   | 1.20 (1.13, 1.28) | 37.6   | <.0001 |
| Trauma; other injuries                                         | 0.23 (0.04)   | 1.26 (1.16, 1.37) | 28.1   | <.0001 |
| Major psychiatric disorders                                    | 0.46 (0.07)   | 1.58 (1.36, 1.83) | 37.2   | <.0001 |
| Chronic Liver Disease                                          | 0.18 (0.08)   | 1.19 (1.02, 1.40) | 4.8    | 0.03   |
| Severe hematological disorders                                 | 0.16 (0.03)   | 1.18 (1.11, 1.25) | 26.7   | <.0001 |
| Iron deficiency or other/unspecified anemias and blood disease | -0.07 (0.04)  | 0.93 (0.87, 1.00) | 3.6    | 0.06   |
| Depression                                                     | 0.05 (0.08)   | 1.06 (0.90, 1.24) | 0.4    | 0.52   |
| Parkinson's and Huntington's diseases                          | 0.07 (0.07)   | 1.07 (0.93, 1.23) | 0.9    | 0.34   |
| Seizure disorders and convulsions                              | 0.11 (0.05)   | 1.12 (1.02, 1.23) | 5.8    | 0.02   |
| Fibrosis of lung or other chronic lung disorders               | -0.17 (0.05)  | 0.84 (0.76, 0.93) | 10.7   | <.01   |
| Asthma                                                         | -0.19 (0.05)  | 0.83 (0.75, 0.91) | 13.9   | <.001  |

**Appendix Table 5b. HF Risk Model for ICU or Intermediate Care Utilization** The risk model for predicted ICU utilization in HF was estimated from a 10% random sample of HF patients treated nationwide (N=62,050), using binary logistic regression (c=0.56).

| Variable                                                       | Estimate (SE) | Odds Ratio (95% CI) | Chi Sq | P      |
|----------------------------------------------------------------|---------------|---------------------|--------|--------|
| Intercept                                                      | -0.04 (0.04)  | 0.00 (0.00, 0.00)   | 0.9    | 0.34   |
| <i>Patient Demographics</i>                                    |               |                     |        |        |
| Age 65-69 (reference)                                          | --            | --                  | --     | --     |
| Age 70-74                                                      | -0.04 (0.03)  | 0.96 (0.90, 1.02)   | 1.8    | 0.17   |
| Age 75-79                                                      | -0.07 (0.03)  | 0.93 (0.88, 0.99)   | 4.9    | 0.03   |
| Age 80-84                                                      | -0.12 (0.03)  | 0.89 (0.84, 0.95)   | 14.5   | <.001  |
| Age 85+                                                        | -0.21 (0.03)  | 0.81 (0.77, 0.86)   | 53.7   | <.0001 |
| Sex (male)                                                     | 0.10 (0.02)   | 1.10 (1.07, 1.14)   | 32.9   | <.0001 |
| Race- White (reference)                                        | --            | --                  | --     | --     |
| Race- Black                                                    | 0.01 (0.03)   | 1.01 (0.96, 1.06)   | 0.1    | 0.74   |
| Race- Hispanic                                                 | 0.39 (0.04)   | 1.48 (1.37, 1.60)   | 98.5   | <.0001 |
| Race- Other                                                    | 0.34 (0.05)   | 1.40 (1.27, 1.55)   | 45.0   | <.0001 |
| Emergent Type Admission                                        | 0.01 (0.02)   | 1.01 (0.97, 1.05)   | 0.2    | 0.63   |
| Treatment at another hospital's ED                             | 0.74 (0.60)   | 2.09 (0.64, 6.85)   | 1.5    | 0.22   |
| Prior Dialysis Visit                                           | -0.07 (0.10)  | 0.94 (0.77, 1.14)   | 0.4    | 0.52   |
| <i>Principal Diagnoses</i>                                     |               |                     |        |        |
| HF with Chronic Kidney Disease                                 | 0.37 (0.04)   | 1.44 (1.34, 1.56)   | 93.5   | <.0001 |
| HF with Hypertension                                           | 0.25 (0.05)   | 1.29 (1.16, 1.42)   | 23.7   | <.0001 |
| HF, other                                                      | --            | --                  | --     | --     |
| <i>Comorbidities</i>                                           |               |                     |        |        |
| History of PTCA                                                | -0.07 (0.03)  | 0.93 (0.89, 0.98)   | 7.5    | <.01   |
| History of CABG                                                | -0.08 (0.02)  | 0.92 (0.89, 0.96)   | 18.1   | <.0001 |
| Heart Failure                                                  | 0.10 (0.05)   | 1.10 (1.00, 1.22)   | 3.7    | 0.05   |
| Myocardial Infarction                                          | 0.01 (0.04)   | 1.01 (0.94, 1.09)   | 0.1    | 0.72   |
| Unstable Angina                                                | 0.08 (0.02)   | 1.09 (1.04, 1.14)   | 13.3   | <.001  |
| Cardio-respiratory Failure or Shock                            | 0.17 (0.02)   | 1.18 (1.14, 1.22)   | 99.9   | <.0001 |
| Valvular Heart Disease                                         | -0.04 (0.03)  | 0.96 (0.90, 1.02)   | 1.9    | 0.17   |
| Hypertension                                                   | 0.07 (0.03)   | 1.07 (1.01, 1.15)   | 4.4    | 0.04   |
| Stroke                                                         | 0.01 (0.02)   | 1.01 (0.97, 1.06)   | 0.2    | 0.65   |
| Cerebrovascular Disease                                        | -0.01 (0.02)  | 1.00 (0.96, 1.03)   | 0.1    | 0.78   |
| Renal Failure                                                  | 0.07 (0.02)   | 1.07 (1.03, 1.10)   | 14.7   | <.001  |
| COPD                                                           | 0.13 (0.02)   | 1.14 (1.10, 1.17)   | 53.8   | <.0001 |
| Pneumonia; pleural effusion/pneumothorax                       | 0.03 (0.02)   | 1.03 (1.00, 1.06)   | 2.8    | 0.10   |
| Diabetes                                                       | 0.16 (0.03)   | 1.17 (1.10, 1.25)   | 26.6   | <.0001 |
| Malnutrition                                                   | -0.04 (0.02)  | 0.96 (0.92, 1.00)   | 4.1    | 0.04   |
| Dementia or other specified brain disorders                    | -0.06 (0.03)  | 0.95 (0.88, 1.01)   | 2.7    | 0.10   |
| Hemiplegia, paraplegia, paralysis, functional disability       | 0.02 (0.02)   | 1.02 (0.99, 1.06)   | 1.6    | 0.20   |
| Vascular disease and complications                             | -0.08 (0.04)  | 0.93 (0.85, 1.00)   | 3.5    | 0.06   |
| Cancer                                                         | -0.01 (0.02)  | 0.99 (0.95, 1.02)   | 0.5    | 0.50   |
| Trauma; other injuries                                         | 0.02 (0.03)   | 1.02 (0.96, 1.08)   | 0.5    | 0.48   |
| Major psychiatric disorders                                    | 0.03 (0.05)   | 1.04 (0.94, 1.14)   | 0.5    | 0.49   |
| Chronic Liver Disease                                          | 0.05 (0.06)   | 1.05 (0.94, 1.17)   | 0.7    | 0.40   |
| Severe hematological disorders                                 | 0.05 (0.02)   | 1.06 (1.02, 1.09)   | 9.5    | <.01   |
| Iron deficiency or other/unspecified anemias and blood disease | -0.10 (0.02)  | 0.90 (0.87, 0.94)   | 22.5   | <.0001 |
| Depression                                                     | -0.01 (0.05)  | 0.99 (0.89, 1.10)   | 0.1    | 0.79   |
| Parkinson's and Huntington's diseases                          | 0.02 (0.05)   | 1.02 (0.94, 1.12)   | 0.2    | 0.63   |
| Seizure disorders and convulsions                              | -0.04 (0.03)  | 0.96 (0.91, 1.02)   | 1.8    | 0.18   |
| Fibrosis of lung or other chronic lung disorders               | -0.01 (0.03)  | 0.99 (0.94, 1.05)   | 0.1    | 0.77   |
| Asthma                                                         | 0.01 (0.03)   | 1.01 (0.95, 1.07)   | 0.1    | 0.80   |

**Appendix Table 5c. HF Risk Model for Predicted Cost** The risk model for predicted cost in HF was estimated from a 10% random sample of HF patients treated nationwide (N=62,050), using robust regression and m-estimation ( $R^2=0.025$ ).

| Variable                                                                                               | Estimate (SE)   | 95% CI           | Chi Sq | P      |
|--------------------------------------------------------------------------------------------------------|-----------------|------------------|--------|--------|
| Intercept                                                                                              | 12225.5 (228.3) | 11778.1, 12672.8 | 2868.4 | <.0001 |
| <i>Patient Demographics</i>                                                                            |                 |                  |        |        |
| Age 65-69 (reference)                                                                                  | --              | --               | --     | --     |
| Age 70-74                                                                                              | -240.1 (164.8)  | -563.1, 82.9     | 2.1    | 0.15   |
| Age 75-79                                                                                              | -217.6 (160.7)  | -532.6, 97.4     | 1.8    | 0.18   |
| Age 80-84                                                                                              | -274.5 (157.8)  | -583.8, 34.7     | 3.0    | 0.08   |
| Age 85+                                                                                                | -737.4 (149.2)  | -1029.8, -445.0  | 24.4   | <.0001 |
| Sex (male)                                                                                             | 279.5 (87.8)    | 107.3, 451.7     | 10.1   | <.01   |
| Race- White (reference)                                                                                | --              | --               | --     | --     |
| Race- Black                                                                                            | 366.4 (139.2)   | 93.6, 639.2      | 6.9    | <.01   |
| Race- Hispanic                                                                                         | 1382.5 (201.5)  | 987.6, 1777.4    | 47.1   | <.0001 |
| Race- Other                                                                                            | 1063.5 (256.8)  | 560.1, 1566.8    | 17.2   | <.0001 |
| Emergent Type Admission                                                                                | -126.2 (102.5)  | -327.1, 74.6     | 1.5    | 0.22   |
| Treatment at another hospital's ED                                                                     | 1351.8 (2906.5) | -4344.8, 7048.5  | 0.2    | 0.64   |
| Prior Dialysis Visit                                                                                   | 801.2 (527.8)   | -233.2, 1835.6   | 2.3    | 0.13   |
| <i>Principal Diagnosis</i>                                                                             |                 |                  |        |        |
| HF with Chronic Kidney Disease                                                                         | 4364.6 (193.6)  | 3985.2, 4744.1   | 508.2  | <.0001 |
| HF with Hypertension                                                                                   | -116.2 (266.7)  | -638.9, 406.4    | 0.2    | 0.66   |
| HF, other                                                                                              | --              | --               | --     | --     |
| <i>Comorbidities</i>                                                                                   |                 |                  |        |        |
| History of PTCA                                                                                        | -516.1 (155.8)  | -821.4, -210.7   | 11.0   | <.001  |
| History of CABG                                                                                        | -634.3 (134.3)  | -897.5, -371.1   | 22.3   | <.0001 |
| Heart Failure                                                                                          | -1011.3 (96.5)  | -1200.4, -822.2  | 109.8  | <.0001 |
| Myocardial Infarction                                                                                  | 313.1 (263.6)   | -203.6, 829.7    | 1.4    | 0.24   |
| Unstable Angina                                                                                        | -541.6 (185.3)  | -904.8, -178.4   | 8.5    | <.01   |
| Cardio-respiratory Failure or Shock                                                                    | 138.7 (118.2)   | -93.0, 370.4     | 1.4    | 0.24   |
| Valvular Heart Disease                                                                                 | 1094.0 (86.5)   | 924.6, 1263.5    | 160.1  | <.0001 |
| Hypertension                                                                                           | -740.1 (164.4)  | -1062.3, -417.9  | 20.3   | <.0001 |
| Stroke                                                                                                 | -73.6 (174.1)   | -414.8, 267.6    | 0.2    | 0.67   |
| Cerebrovascular Disease                                                                                | -71.6 (120.2)   | -307.2, 163.9    | 0.4    | 0.55   |
| Renal Failure                                                                                          | 77.8 (97.3)     | -112.8, 268.5    | 0.6    | 0.42   |
| COPD                                                                                                   | 991.6 (89.1)    | 816.9, 1166.2    | 123.9  | <.0001 |
| Pneumonia; pleural effusion/pneumothorax                                                               | 1696.9 (89.5)   | 1521.4, 1872.3   | 359.4  | <.0001 |
| Diabetes                                                                                               | 769.4 (89.0)    | 595.1, 943.8     | 74.8   | <.0001 |
| Malnutrition                                                                                           | 3146.9 (159.3)  | 2834.7, 3459.0   | 390.4  | <.0001 |
| Dementia or other specified brain disorders                                                            | 224.9 (111.2)   | 7.0, 442.9       | 4.1    | 0.04   |
| Hemiplegia, paraplegia, paralysis, functional disability                                               | 328.1 (180.4)   | -25.5, 681.8     | 3.3    | 0.07   |
| Vascular disease and complications                                                                     | 252.2 (95.9)    | 64.1, 440.2      | 6.9    | <.01   |
| Cancer                                                                                                 | 451.1 (213.6)   | 32.4, 869.7      | 4.5    | 0.03   |
| Trauma; other injuries                                                                                 | 309.6 (97.2)    | 119.2, 500.1     | 10.2   | <.01   |
| Major psychiatric disorders                                                                            | 405.4 (151.6)   | 108.4, 702.5     | 7.2    | <.01   |
| Chronic Liver Disease                                                                                  | 1771.1 (260.7)  | 1260.2, 2282.0   | 46.2   | <.0001 |
| Severe hematological disorders                                                                         | 867.6 (288.2)   | 302.8, 1432.4    | 9.1    | <.01   |
| Iron deficiency or other/unspecified anemias and blood disease                                         | 1503.0 (92.2)   | 1322.3, 1683.7   | 265.8  | <.0001 |
| Depression                                                                                             | -212.6 (112.8)  | -433.7, 8.5      | 3.6    | 0.06   |
| Parkinson's and Huntington's diseases                                                                  | 389.9 (277.9)   | -154.8, 934.5    | 2.0    | 0.16   |
| Seizure disorders and convulsions                                                                      | 239.2 (237.3)   | -225.9, 704.3    | 1.0    | 0.31   |
| Fibrosis of lung or other chronic lung disorders                                                       | 180.6 (156.3)   | -125.7, 486.9    | 1.3    | 0.25   |
| Asthma                                                                                                 | 29.3 (151.8)    | -268.1, 326.8    | 0.0    | 0.85   |
| *Facility fees for ICU and intermediate care were both assigned the same value in the cost risk score. |                 |                  |        |        |

**Appendix Table 5d. HF Risk Model for Predicted LOS** The risk model for predicted LOS in HF was estimated from a 10% random sample of HF patients treated nationwide (N=62,050), using robust regression and m-estimation ( $R^2=0.035$ ).

| Variable                                                       | Estimate (SE) | 95% CI     | Chi Sq | P      |
|----------------------------------------------------------------|---------------|------------|--------|--------|
| Intercept                                                      | 3.8 (0.1)     | 3.7, 3.9   | 4144.0 | <.0001 |
| <i>Patient Demographics</i>                                    |               |            |        |        |
| Age 65-69 (reference)                                          | --            | --         | --     | --     |
| Age 70-74                                                      | 0.0 (0.0)     | -0.1, 0.0  | 1.4    | 0.24   |
| Age 75-79                                                      | 0.0 (0.0)     | -0.1, 0.1  | 0.0    | 0.90   |
| Age 80-84                                                      | 0.1 (0.0)     | 0.0, 0.1   | 2.3    | 0.13   |
| Age 85+                                                        | 0.0 (0.0)     | -0.1, 0.1  | 0.3    | 0.59   |
| Sex (male)                                                     | 0.0 (0.0)     | -0.1, 0.0  | 3.8    | 0.05   |
| Race- White (reference)                                        | --            | --         | --     | --     |
| Race- Black                                                    | 0.1 (0.0)     | 0.1, 0.2   | 15.3   | <.0001 |
| Race- Hispanic                                                 | 0.0 (0.1)     | -0.1, 0.1  | 0.1    | 0.76   |
| Race- Other                                                    | 0.0 (0.1)     | -0.1, 0.2  | 0.6    | 0.45   |
| Emergent Type Admission                                        | -0.1 (0.0)    | -0.1, 0.0  | 12.2   | <.001  |
| Treatment at another hospital's ED                             | 1.0 (0.7)     | -0.4, 2.5  | 1.9    | 0.17   |
| Prior Dialysis Visit                                           | 0.2 (0.1)     | -0.1, 0.4  | 1.4    | 0.25   |
| <i>Principal Diagnoses</i>                                     |               |            |        |        |
| HF with Chronic Kidney Disease                                 | 1.0 (0.0)     | 0.9, 1.1   | 414.6  | <.0001 |
| HF with Hypertension                                           | -0.3 (0.1)    | -0.5, -0.2 | 22.7   | <.0001 |
| HF, other                                                      | --            | --         | --     | --     |
| <i>Comorbidities</i>                                           |               |            |        |        |
| History of PTCA                                                | -0.2 (0.0)    | -0.3, -0.1 | 24.3   | <.0001 |
| History of CABG                                                | -0.1 (0.0)    | -0.2, -0.1 | 13.9   | <.001  |
| Heart Failure                                                  | -0.2 (0.0)    | -0.3, -0.2 | 89.8   | <.0001 |
| Myocardial Infarction                                          | 0.0 (0.1)     | -0.1, 0.2  | 0.1    | 0.76   |
| Unstable Angina                                                | -0.2 (0.0)    | -0.3, -0.1 | 15.5   | <.0001 |
| Cardio-respiratory Failure or Shock                            | 0.1 (0.0)     | 0.0, 0.1   | 4.1    | 0.04   |
| Valvular Heart Disease                                         | 0.2 (0.0)     | 0.1, 0.2   | 68.9   | <.0001 |
| Hypertension                                                   | -0.3 (0.0)    | -0.4, -0.2 | 41.5   | <.0001 |
| Stroke                                                         | -0.1 (0.0)    | -0.2, 0.0  | 6.3    | 0.01   |
| Cerebrovascular Disease                                        | -0.1 (0.0)    | -0.1, 0.0  | 4.1    | 0.04   |
| Renal Failure                                                  | 0.1 (0.0)     | 0.0, 0.1   | 5.8    | 0.02   |
| COPD                                                           | 0.3 (0.0)     | 0.3, 0.4   | 206.9  | <.0001 |
| Pneumonia; pleural effusion/pneumothorax                       | 0.5 (0.0)     | 0.5, 0.6   | 537.4  | <.0001 |
| Diabetes                                                       | 0.2 (0.0)     | 0.2, 0.3   | 102.6  | <.0001 |
| Malnutrition                                                   | 1.1 (0.0)     | 1.0, 1.2   | 689.5  | <.0001 |
| Dementia or other specified brain disorders                    | 0.2 (0.0)     | 0.1, 0.2   | 30.1   | <.0001 |
| Hemiplegia, paraplegia, paralysis, functional disability       | 0.2 (0.0)     | 0.1, 0.3   | 20.5   | <.0001 |
| Vascular disease and complications                             | 0.0 (0.0)     | 0.0, 0.1   | 3.9    | 0.05   |
| Cancer                                                         | 0.2 (0.1)     | 0.1, 0.3   | 9.9    | <.01   |
| Trauma; other injuries                                         | 0.1 (0.0)     | 0.1, 0.2   | 29.7   | <.0001 |
| Major psychiatric disorders                                    | 0.1 (0.0)     | 0.1, 0.2   | 13.4   | <.001  |
| Chronic Liver Disease                                          | 0.6 (0.1)     | 0.4, 0.7   | 68.7   | <.0001 |
| Severe hematological disorders                                 | 0.2 (0.1)     | 0.0, 0.3   | 6.6    | 0.01   |
| Iron deficiency or other/unspecified anemias and blood disease | 0.5 (0.0)     | 0.4, 0.5   | 377.2  | <.0001 |
| Depression                                                     | 0.1 (0.0)     | 0.0, 0.1   | 7.2    | <.01   |
| Parkinson's and Huntington's diseases                          | 0.1 (0.1)     | 0.0, 0.3   | 4.2    | 0.04   |
| Seizure disorders and convulsions                              | 0.1 (0.1)     | -0.1, 0.2  | 0.8    | 0.38   |
| Fibrosis of lung or other chronic lung disorders               | 0.1 (0.0)     | 0.0, 0.2   | 4.0    | 0.05   |
| Asthma                                                         | 0.0 (0.0)     | -0.1, 0.1  | 0.2    | 0.68   |

**Appendix Table 6. PNA Risk Models** All PNA risk models are based on a 10% random sample of patients admitted nationwide (N=72,508).

**Appendix Table 6a. PNA Risk Model for 30-Day Mortality** The risk model for 30-day mortality in PNA was estimated from a 10% random sample of PNA patients treated nationwide (N=72,508), using binary logistic regression (c=0.75).

| Variable                                                       | Estimate (SE) | Odds Ratio (95% CI) | Chi Sq | P      |
|----------------------------------------------------------------|---------------|---------------------|--------|--------|
| Intercept                                                      | -3.55 (0.07)  | 0.00 (0.00, 0.00)   | 2906.1 | <.0001 |
| <i>Patient Demographics</i>                                    |               |                     |        |        |
| Age 65-69 (reference)                                          | --            | --                  | --     | --     |
| Age 70-74                                                      | 0.18 (0.05)   | 1.20 (1.08, 1.33)   | 12.1   | <.001  |
| Age 75-79                                                      | 0.29 (0.05)   | 1.34 (1.21, 1.48)   | 32.6   | <.0001 |
| Age 80-84                                                      | 0.51 (0.05)   | 1.67 (1.51, 1.84)   | 107.0  | <.0001 |
| Age 85+                                                        | 0.89 (0.05)   | 2.44 (2.23, 2.67)   | 366.0  | <.0001 |
| Sex (male)                                                     | 0.15 (0.02)   | 1.16 (1.11, 1.21)   | 37.6   | <.0001 |
| Race- White (reference)                                        | --            | --                  | --     | --     |
| Race- Black                                                    | -0.19 (0.05)  | 0.82 (0.75, 0.90)   | 17.2   | <.0001 |
| Race- Hispanic                                                 | -0.29 (0.06)  | 0.75 (0.67, 0.84)   | 24.6   | <.0001 |
| Race- Other                                                    | -0.15 (0.07)  | 0.86 (0.75, 0.98)   | 5.0    | 0.03   |
| Emergent Type Admission                                        | 0.09 (0.03)   | 1.09 (1.03, 1.16)   | 8.6    | <.01   |
| Treatment at another hospital's ED                             | 0.39 (0.84)   | 1.48 (0.29, 7.61)   | 0.2    | 0.64   |
| Prior Dialysis Visit                                           | 0.68 (0.11)   | 1.96 (1.57, 2.46)   | 35.1   | <.0001 |
| <i>Principal Diagnoses</i>                                     |               |                     |        |        |
| Pneumonia due to anaerobe or GN bacteria                       | 0.18 (0.07)   | 1.20 (1.04, 1.38)   | 6.1    | 0.01   |
| Aspiration pneumonia                                           | 0.89 (0.03)   | 2.43 (2.30, 2.56)   | 1068.3 | <.0001 |
| Haemophilus Influenza pneumonia                                | -0.34 (0.28)  | 0.71 (0.41, 1.24)   | 1.5    | 0.23   |
| Pneumonia due to MRSA, Pseudomonas, or Legionnaires' disease   | 0.41 (0.06)   | 1.50 (1.32, 1.70)   | 39.8   | <.0001 |
| Pneumococcal pneumonia                                         | -0.22 (0.15)  | 0.80 (0.60, 1.07)   | 2.3    | 0.13   |
| Pneumonia due to Staphylococcus or Streptococcus               | -0.08 (0.21)  | 0.93 (0.61, 1.41)   | 0.1    | 0.72   |
| Viral pneumonia                                                | -0.08 (0.09)  | 0.92 (0.77, 1.10)   | 0.8    | 0.37   |
| Pneumonia, other                                               | --            | --                  | --     | --     |
| <i>Comorbidities</i>                                           |               |                     |        |        |
| History of PTCA                                                | -0.08 (0.05)  | 0.92 (0.83, 1.02)   | 2.3    | 0.13   |
| History of CABG                                                | -0.01 (0.05)  | 0.99 (0.90, 1.09)   | 0.1    | 0.82   |
| Heart Failure                                                  | 0.20 (0.03)   | 1.22 (1.16, 1.29)   | 54.4   | <.0001 |
| Myocardial Infarction                                          | 0.14 (0.09)   | 1.15 (0.97, 1.37)   | 2.7    | 0.10   |
| Unstable Angina                                                | -0.14 (0.06)  | 0.87 (0.77, 0.99)   | 4.6    | 0.03   |
| Cardio-respiratory Failure or Shock                            | 0.26 (0.03)   | 1.30 (1.22, 1.37)   | 76.1   | <.0001 |
| Valvular Heart Disease                                         | 0.04 (0.03)   | 1.04 (0.99, 1.10)   | 2.1    | 0.15   |
| Hypertension                                                   | -0.12 (0.04)  | 0.89 (0.83, 0.95)   | 11.8   | <.001  |
| Stroke                                                         | 0.05 (0.04)   | 1.05 (0.98, 1.14)   | 1.7    | 0.19   |
| Cerebrovascular Disease                                        | 0.00 (0.03)   | 1.00 (0.94, 1.06)   | 0.0    | 0.91   |
| Renal Failure                                                  | 0.13 (0.03)   | 1.14 (1.08, 1.20)   | 21.6   | <.0001 |
| COPD                                                           | -0.01 (0.02)  | 0.99 (0.94, 1.03)   | 0.4    | 0.55   |
| Pneumonia; pleural effusion/pneumothorax                       | 0.12 (0.03)   | 1.12 (1.05, 1.20)   | 13.1   | <.001  |
| Diabetes                                                       | -0.07 (0.02)  | 0.93 (0.89, 0.98)   | 7.6    | <.01   |
| Malnutrition                                                   | 0.72 (0.03)   | 2.05 (1.94, 2.16)   | 655.3  | <.0001 |
| Dementia or other specified brain disorders                    | 0.50 (0.03)   | 1.64 (1.56, 1.73)   | 357.4  | <.0001 |
| Hemiplegia, paraplegia, paralysis, functional disability       | 0.13 (0.04)   | 1.14 (1.06, 1.23)   | 13.0   | <.001  |
| Vascular disease and complications                             | 0.06 (0.03)   | 1.06 (1.01, 1.11)   | 4.9    | 0.03   |
| Cancer                                                         | 1.16 (0.03)   | 3.19 (2.98, 3.41)   | 1163.2 | <.0001 |
| Trauma; other injuries                                         | 0.18 (0.02)   | 1.20 (1.15, 1.26)   | 56.4   | <.0001 |
| Major psychiatric disorders                                    | 0.05 (0.03)   | 1.05 (0.99, 1.11)   | 2.2    | 0.14   |
| Chronic Liver Disease                                          | 0.39 (0.07)   | 1.48 (1.28, 1.71)   | 27.5   | <.0001 |
| Severe hematological disorders                                 | 0.13 (0.07)   | 1.14 (0.99, 1.31)   | 3.1    | 0.08   |
| Iron deficiency or other/unspecified anemias and blood disease | 0.13 (0.03)   | 1.13 (1.08, 1.19)   | 23.9   | <.0001 |
| Depression                                                     | -0.02 (0.03)  | 0.98 (0.93, 1.03)   | 0.7    | 0.40   |
| Parkinson's and Huntington's diseases                          | 0.09 (0.05)   | 1.10 (1.00, 1.20)   | 4.0    | 0.05   |

| <b>Variable</b>                                  | <b>Estimate (SE)</b> | <b>Odds Ratio<br/>(95% CI)</b> | <b>Chi Sq</b> | <b>P</b> |
|--------------------------------------------------|----------------------|--------------------------------|---------------|----------|
| Seizure disorders and convulsions                | -0.03 (0.04)         | 0.97 (0.89, 1.05)              | 0.6           | 0.44     |
| Fibrosis of lung or other chronic lung disorders | 0.10 (0.03)          | 1.10 (1.03, 1.18)              | 8.5           | <.01     |
| Asthma                                           | -0.30 (0.04)         | 0.74 (0.68, 0.81)              | 47.2          | <.0001   |

**Appendix Table 6b. PNA Risk Model for ICU or Intermediate Care Utilization** The risk model for predicted ICU utilization in PNA was estimated from a 10% random sample of PNA patients treated nationwide (N=72,508), using binary logistic regression (c=0.62).

| Variable                                                       | Estimate (SE) | Odds Ratio (95% CI) | Chi Sq | P      |
|----------------------------------------------------------------|---------------|---------------------|--------|--------|
| Intercept                                                      | -1.14 (0.04)  | 0.00 (0.00, 0.00)   | 784.8  | <.0001 |
| <i>Patient Demographics</i>                                    |               |                     |        |        |
| Age 65-69 (reference)                                          | --            | --                  | --     | --     |
| Age 70-74                                                      | -0.03 (0.03)  | 0.97 (0.91, 1.03)   | 1.3    | 0.26   |
| Age 75-79                                                      | -0.09 (0.03)  | 0.92 (0.86, 0.97)   | 9.0    | <.01   |
| Age 80-84                                                      | -0.11 (0.03)  | 0.90 (0.85, 0.95)   | 13.6   | <.001  |
| Age 85+                                                        | -0.19 (0.03)  | 0.83 (0.78, 0.87)   | 47.9   | <.0001 |
| Sex (male)                                                     | 0.06 (0.02)   | 1.06 (1.02, 1.09)   | 11.2   | <.001  |
| Race- White (reference)                                        | --            | --                  | --     | --     |
| Race- Black                                                    | 0.02 (0.03)   | 1.02 (0.96, 1.08)   | 0.3    | 0.56   |
| Race- Hispanic                                                 | 0.43 (0.04)   | 1.54 (1.43, 1.65)   | 141.0  | <.0001 |
| Race- Other                                                    | 0.16 (0.04)   | 1.17 (1.07, 1.28)   | 12.6   | <.001  |
| Emergent Type Admission                                        | 0.17 (0.02)   | 1.19 (1.14, 1.24)   | 72.1   | <.0001 |
| Treatment at another hospital's ED                             | 0.64 (0.68)   | 1.89 (0.50, 7.16)   | 0.9    | 0.35   |
| Prior Dialysis Visit                                           | 0.05 (0.09)   | 1.05 (0.88, 1.26)   | 0.3    | 0.57   |
| <i>Principal Diagnoses</i>                                     |               |                     |        |        |
| Pneumonia due to anaerobe or GN bacteria                       | 0.08 (0.05)   | 1.09 (0.98, 1.20)   | 2.7    | 0.10   |
| Aspiration pneumonia                                           | 0.46 (0.02)   | 1.58 (1.51, 1.65)   | 438.8  | <.0001 |
| Haemophilus Influenza pneumonia                                | 0.53 (0.14)   | 1.70 (1.28, 2.25)   | 13.6   | <.001  |
| Pneumonia due to MRSA, Pseudomonas, or Legionnaires' disease   | 0.35 (0.05)   | 1.42 (1.30, 1.55)   | 59.4   | <.0001 |
| Pneumococcal pneumonia                                         | 0.05 (0.08)   | 1.06 (0.91, 1.23)   | 0.5    | 0.48   |
| Pneumonia due to Staphylococcus or Streptococcus               | 0.29 (0.12)   | 1.34 (1.05, 1.71)   | 5.5    | 0.02   |
| Viral pneumonia                                                | 0.22 (0.05)   | 1.24 (1.12, 1.38)   | 17.2   | <.0001 |
| Pneumonia, other                                               | --            | --                  | --     | --     |
| <i>Comorbidities</i>                                           |               |                     |        |        |
| History of PTCA                                                | -0.01 (0.04)  | 0.99 (0.92, 1.07)   | 0.1    | 0.81   |
| History of CABG                                                | -0.02 (0.03)  | 0.98 (0.92, 1.05)   | 0.3    | 0.58   |
| Heart Failure                                                  | 0.13 (0.02)   | 1.13 (1.09, 1.18)   | 43.3   | <.0001 |
| Myocardial Infarction                                          | 0.18 (0.07)   | 1.20 (1.05, 1.37)   | 7.2    | <.01   |
| Unstable Angina                                                | 0.05 (0.05)   | 1.05 (0.96, 1.14)   | 1.0    | 0.31   |
| Cardio-respiratory Failure or Shock                            | 0.26 (0.02)   | 1.29 (1.24, 1.35)   | 141.6  | <.0001 |
| Valvular Heart Disease                                         | 0.32 (0.02)   | 1.37 (1.32, 1.43)   | 259.7  | <.0001 |
| Hypertension                                                   | 0.09 (0.02)   | 1.10 (1.05, 1.15)   | 14.9   | <.001  |
| Stroke                                                         | -0.02 (0.03)  | 0.99 (0.93, 1.05)   | 0.3    | 0.61   |
| Cerebrovascular Disease                                        | -0.02 (0.02)  | 0.98 (0.94, 1.02)   | 0.8    | 0.36   |
| Renal Failure                                                  | 0.07 (0.02)   | 1.08 (1.04, 1.12)   | 14.3   | <.001  |
| COPD                                                           | 0.21 (0.02)   | 1.23 (1.19, 1.27)   | 153.5  | <.0001 |
| Pneumonia; pleural effusion/pneumothorax                       | -0.22 (0.02)  | 0.80 (0.77, 0.83)   | 113.1  | <.0001 |
| Diabetes                                                       | 0.12 (0.02)   | 1.12 (1.09, 1.16)   | 46.4   | <.0001 |
| Malnutrition                                                   | 0.23 (0.02)   | 1.26 (1.20, 1.32)   | 100.0  | <.0001 |
| Dementia or other specified brain disorders                    | -0.05 (0.02)  | 0.95 (0.92, 0.99)   | 6.2    | 0.01   |
| Hemiplegia, paraplegia, paralysis, functional disability       | 0.06 (0.03)   | 1.06 (1.01, 1.13)   | 4.6    | 0.03   |
| Vascular disease and complications                             | 0.01 (0.02)   | 1.01 (0.97, 1.05)   | 0.3    | 0.60   |
| Cancer                                                         | -0.02 (0.03)  | 0.99 (0.93, 1.04)   | 0.3    | 0.59   |
| Trauma; other injuries                                         | -0.01 (0.02)  | 0.99 (0.96, 1.03)   | 0.3    | 0.62   |
| Major psychiatric disorders                                    | 0.01 (0.02)   | 1.01 (0.97, 1.06)   | 0.2    | 0.68   |
| Chronic Liver Disease                                          | 0.00 (0.06)   | 1.00 (0.90, 1.11)   | 0.0    | 0.98   |
| Severe hematological disorders                                 | -0.03 (0.06)  | 0.97 (0.87, 1.08)   | 0.3    | 0.59   |
| Iron deficiency or other/unspecified anemias and blood disease | 0.16 (0.02)   | 1.18 (1.14, 1.22)   | 91.4   | <.0001 |
| Depression                                                     | -0.09 (0.02)  | 0.92 (0.88, 0.95)   | 20.6   | <.0001 |
| Parkinson's and Huntington's diseases                          | -0.07 (0.04)  | 0.93 (0.87, 1.00)   | 3.7    | 0.06   |
| Seizure disorders and convulsions                              | 0.07 (0.03)   | 1.08 (1.01, 1.15)   | 5.1    | 0.02   |
| Fibrosis of lung or other chronic lung disorders               | 0.04 (0.02)   | 1.04 (0.99, 1.09)   | 2.9    | 0.09   |
| Asthma                                                         | -0.09 (0.03)  | 0.92 (0.87, 0.96)   | 11.5   | <.001  |



**Appendix Table 6c. PNA Risk Model for Predicted Cost** The risk model for predicted cost in PNA was estimated from a 10% random sample of PNA patients treated nationwide (N=72,508), using robust regression and m-estimation ( $R^2=0.054$ ).

| Variable                                                       | Estimate (SE)   | 95% CI           | Chi Sq | P      |
|----------------------------------------------------------------|-----------------|------------------|--------|--------|
| Intercept                                                      | 8171.4 (169.7)  | 7838.7, 8504.1   | 2317.6 | <.0001 |
| <i>Patient Demographics</i>                                    |                 |                  |        |        |
| Age 65-69 (reference)                                          | --              | --               | --     | --     |
| Age 70-74                                                      | -62.4 (126.4)   | -310.1, 185.4    | 0.2    | 0.62   |
| Age 75-79                                                      | -32.5 (125.0)   | -277.5, 212.4    | 0.1    | 0.79   |
| Age 80-84                                                      | 114.5 (123.7)   | -128.0, 356.9    | 0.9    | 0.35   |
| Age 85+                                                        | 20.5 (117.1)    | -209.0, 250.1    | 0.0    | 0.86   |
| Sex (male)                                                     | -224.6 (69.1)   | -360.1, -89.1    | 10.6   | <.01   |
| Race- White (reference)                                        | --              | --               | --     | --     |
| Race- Black                                                    | 670.0 (130.7)   | 413.8, 926.2     | 26.3   | <.0001 |
| Race- Hispanic                                                 | 1710.6 (158.4)  | 1400.2, 2021.1   | 116.7  | <.0001 |
| Race- Other                                                    | 457.0 (191.4)   | 81.7, 832.2      | 5.7    | 0.02   |
| Emergent Type Admission                                        | 714.8 (84.4)    | 549.3, 880.3     | 71.7   | <.0001 |
| Treatment at another hospital's ED                             | 2654.2 (2991.5) | -3209.1, 8517.5  | 0.8    | 0.37   |
| Prior Dialysis Visit                                           | 1823.0 (394.8)  | 1049.2, 2596.8   | 21.3   | <.0001 |
| <i>Principal Diagnoses</i>                                     |                 |                  |        |        |
| Pneumonia due to anaerobe or GN bacteria                       | 2561.7 (215.5)  | 2139.4, 2984.1   | 141.3  | <.0001 |
| Aspiration pneumonia                                           | 3458.3 (93.8)   | 3274.3, 3642.2   | 1358.3 | <.0001 |
| Haemophilus Influenza pneumonia                                | 3327.1 (629.6)  | 2093.0, 4561.1   | 27.9   | <.0001 |
| Pneumonia due to MRSA, Pseudomonas, or Legionnaires' disease   | 6838.9 (198.2)  | 6450.4, 7227.4   | 1190.3 | <.0001 |
| Pneumococcal pneumonia                                         | 1096.9 (326.8)  | 456.3, 1737.4    | 11.3   | <.001  |
| Pneumonia due to Staphylococcus or Streptococcus               | 2111.1 (540.6)  | 1051.6, 3170.6   | 15.3   | <.0001 |
| Viral pneumonia                                                | 1672.2 (221.9)  | 1237.4, 2107.0   | 56.8   | <.0001 |
| Pneumonia, other                                               | --              | --               | --     | --     |
| <i>Comorbidities</i>                                           |                 |                  |        |        |
| History of PTCA                                                | -133.8 (155.7)  | -438.9, 171.4    | 0.7    | 0.39   |
| History of CABG                                                | -409.0 (146.7)  | -696.5, -121.4   | 7.8    | <.01   |
| Heart Failure                                                  | 617.5 (81.4)    | 458.0, 777.1     | 57.6   | <.0001 |
| Myocardial Infarction                                          | 419.3 (296.7)   | -162.2, 1000.9   | 2.0    | 0.16   |
| Unstable Angina                                                | 128.7 (196.0)   | -255.5, 512.9    | 0.4    | 0.51   |
| Cardio-respiratory Failure or Shock                            | 671.7 (93.0)    | 489.5, 853.9     | 52.2   | <.0001 |
| Valvular Heart Disease                                         | 1778.4 (84.2)   | 1613.3, 1943.5   | 445.6  | <.0001 |
| Hypertension                                                   | 538.4 (101.0)   | 340.3, 736.4     | 28.4   | <.0001 |
| Stroke                                                         | -286.1 (128.8)  | -538.6, -33.5    | 4.9    | 0.03   |
| Cerebrovascular Disease                                        | -36.9 (93.5)    | -220.3, 146.4    | 0.2    | 0.69   |
| Renal Failure                                                  | 190.8 (84.0)    | 26.2, 355.5      | 5.2    | 0.02   |
| COPD                                                           | 1377.6 (70.8)   | 1238.8, 1516.3   | 378.6  | <.0001 |
| Pneumonia; pleural effusion/pneumothorax                       | -1445.3 (89.4)  | -1620.5, -1270.1 | 261.4  | <.0001 |
| Diabetes                                                       | 864.0 (71.2)    | 724.5, 1003.5    | 147.3  | <.0001 |
| Malnutrition                                                   | 3153.8 (99.6)   | 2958.6, 3348.9   | 1003.5 | <.0001 |
| Dementia or other specified brain disorders                    | 250.8 (80.5)    | 92.9, 408.6      | 9.7    | <.01   |
| Hemiplegia, paraplegia, paralysis, functional disability       | 608.3 (123.3)   | 366.6, 849.9     | 24.3   | <.0001 |
| Vascular disease and complications                             | 158.3 (76.8)    | 7.8, 308.8       | 4.3    | 0.04   |
| Cancer                                                         | 534.9 (117.7)   | 304.3, 765.6     | 20.7   | <.0001 |
| Trauma; other injuries                                         | 241.9 (73.5)    | 97.9, 386.0      | 10.8   | <.01   |
| Major psychiatric disorders                                    | 111.2 (96.8)    | -78.4, 300.9     | 1.3    | 0.25   |
| Chronic Liver Disease                                          | 393.4 (238.9)   | -74.7, 861.6     | 2.7    | 0.10   |
| Severe hematological disorders                                 | 808.7 (237.0)   | 344.2, 1273.1    | 11.7   | <.001  |
| Iron deficiency or other/unspecified anemias and blood disease | 1588.4 (71.8)   | 1447.6, 1729.1   | 489.1  | <.0001 |
| Depression                                                     | -139.7 (81.2)   | -298.8, 19.4     | 3.0    | 0.09   |
| Parkinson's and Huntington's diseases                          | 249.8 (153.3)   | -50.7, 550.3     | 2.7    | 0.10   |
| Seizure disorders and convulsions                              | 649.4 (140.3)   | 374.5, 924.4     | 21.4   | <.0001 |
| Fibrosis of lung or other chronic lung disorders               | 677.9 (100.0)   | 481.9, 873.8     | 46.0   | <.0001 |
| Asthma                                                         | -234.8 (109.8)  | -450.0, -19.6    | 4.6    | 0.03   |

\*Facility fees for ICU and intermediate care were both assigned the same value in the cost risk score.

**Appendix Table 6d. PNA Risk Model for Predicted LOS** The risk model for predicted LOS in PNA was estimated from a 10% random sample of PNA patients treated nationwide (N=72,508), using robust regression and m-estimation ( $R^2=0.066$ ).

| Variable                                                       | Estimate (SE) | 95% CI     | Chi Sq | P      |
|----------------------------------------------------------------|---------------|------------|--------|--------|
| Intercept                                                      | 3.5 (0.1)     | 3.4, 3.6   | 4244.6 | <.0001 |
| <i>Patient Demographics</i>                                    |               |            |        |        |
| Age 65-69 (reference)                                          | --            | --         | --     | --     |
| Age 70-74                                                      | 0.0 (0.0)     | -0.1, 0.1  | 0.5    | 0.49   |
| Age 75-79                                                      | 0.1 (0.0)     | 0.0, 0.2   | 9.0    | <.01   |
| Age 80-84                                                      | 0.2 (0.0)     | 0.1, 0.3   | 28.4   | <.0001 |
| Age 85+                                                        | 0.3 (0.0)     | 0.2, 0.3   | 50.5   | <.0001 |
| Sex (male)                                                     | -0.2 (0.0)    | -0.2, -0.1 | 60.1   | <.0001 |
| Race- White (reference)                                        | --            | --         | --     | --     |
| Race- Black                                                    | 0.3 (0.0)     | 0.2, 0.3   | 40.7   | <.0001 |
| Race- Hispanic                                                 | 0.1 (0.0)     | 0.0, 0.2   | 2.4    | 0.12   |
| Race- Other                                                    | 0.0 (0.1)     | -0.1, 0.1  | 0.0    | 0.99   |
| Emergent Type Admission                                        | 0.0 (0.0)     | 0.0, 0.1   | 1.4    | 0.23   |
| Treatment at another hospital's ED                             | -0.3 (0.9)    | -2.2, 1.5  | 0.1    | 0.72   |
| Prior Dialysis Visit                                           | 0.5 (0.1)     | 0.3, 0.8   | 16.8   | <.0001 |
| <i>Principal Diagnoses</i>                                     |               |            |        |        |
| Pneumonia due to anaerobe or GN bacteria                       | 1.2 (0.1)     | 1.0, 1.3   | 298.4  | <.0001 |
| Aspiration pneumonia                                           | 1.0 (0.0)     | 1.0, 1.1   | 1259.6 | <.0001 |
| Haemophilus Influenza pneumonia                                | 1.0 (0.2)     | 0.6, 1.3   | 23.1   | <.0001 |
| Pneumonia due to MRSA, Pseudomonas, or Legionnaires' disease   | 2.7 (0.1)     | 2.6, 2.9   | 1923.1 | <.0001 |
| Pneumococcal pneumonia                                         | 0.5 (0.1)     | 0.3, 0.7   | 21.4   | <.0001 |
| Pneumonia due to Staphylococcus or Streptococcus               | 0.8 (0.2)     | 0.5, 1.1   | 22.4   | <.0001 |
| Viral pneumonia                                                | 0.7 (0.1)     | 0.5, 0.8   | 90.4   | <.0001 |
| Pneumonia, other                                               | --            | --         | --     | --     |
| <i>Comorbidities</i>                                           |               |            |        |        |
| History of PTCA                                                | -0.1 (0.0)    | -0.2, 0.0  | 1.7    | 0.19   |
| History of CABG                                                | -0.1 (0.0)    | -0.2, 0.0  | 7.2    | <.01   |
| Heart Failure                                                  | 0.2 (0.0)     | 0.1, 0.2   | 47.1   | <.0001 |
| Myocardial Infarction                                          | -0.1 (0.1)    | -0.2, 0.1  | 0.4    | 0.55   |
| Unstable Angina                                                | 0.0 (0.1)     | -0.2, 0.1  | 0.3    | 0.58   |
| Cardio-respiratory Failure or Shock                            | 0.1 (0.0)     | 0.1, 0.2   | 21.3   | <.0001 |
| Valvular Heart Disease                                         | 0.4 (0.0)     | 0.3, 0.4   | 177.3  | <.0001 |
| Hypertension                                                   | 0.2 (0.0)     | 0.1, 0.2   | 26.8   | <.0001 |
| Stroke                                                         | -0.1 (0.0)    | -0.1, 0.0  | 1.8    | 0.18   |
| Cerebrovascular Disease                                        | 0.0 (0.0)     | -0.1, 0.1  | 0.0    | 0.99   |
| Renal Failure                                                  | 0.0 (0.0)     | 0.0, 0.1   | 0.2    | 0.63   |
| COPD                                                           | 0.4 (0.0)     | 0.4, 0.4   | 329.0  | <.0001 |
| Pneumonia; pleural effusion/pneumothorax                       | -0.4 (0.0)    | -0.5, -0.3 | 201.9  | <.0001 |
| Diabetes                                                       | 0.2 (0.0)     | 0.2, 0.3   | 108.2  | <.0001 |
| Malnutrition                                                   | 1.2 (0.0)     | 1.1, 1.2   | 1369.6 | <.0001 |
| Dementia or other specified brain disorders                    | 0.2 (0.0)     | 0.1, 0.2   | 49.1   | <.0001 |
| Hemiplegia, paraplegia, paralysis, functional disability       | 0.2 (0.0)     | 0.1, 0.3   | 31.5   | <.0001 |
| Vascular disease and complications                             | 0.0 (0.0)     | 0.0, 0.1   | 0.2    | 0.63   |
| Cancer                                                         | 0.2 (0.0)     | 0.1, 0.3   | 27.4   | <.0001 |
| Trauma; other injuries                                         | 0.1 (0.0)     | 0.1, 0.2   | 22.5   | <.0001 |
| Major psychiatric disorders                                    | 0.0 (0.0)     | 0.0, 0.1   | 0.9    | 0.34   |
| Chronic Liver Disease                                          | 0.1 (0.1)     | 0.0, 0.3   | 2.6    | 0.10   |
| Severe hematological disorders                                 | 0.4 (0.1)     | 0.3, 0.6   | 35.9   | <.0001 |
| Iron deficiency or other/unspecified anemias and blood disease | 0.5 (0.0)     | 0.5, 0.6   | 517.0  | <.0001 |
| Depression                                                     | 0.1 (0.0)     | 0.0, 0.1   | 4.6    | 0.03   |
| Parkinson's and Huntington's diseases                          | 0.2 (0.0)     | 0.1, 0.3   | 19.9   | <.0001 |
| Seizure disorders and convulsions                              | 0.2 (0.0)     | 0.1, 0.3   | 17.1   | <.0001 |
| Fibrosis of lung or other chronic lung disorders               | 0.2 (0.0)     | 0.2, 0.3   | 53.0   | <.0001 |
| Asthma                                                         | 0.0 (0.0)     | -0.1, 0.1  | 0.0    | 0.87   |

**Appendix Table 7. Propensity Score Models for Admission to a Major Teaching Hospital**

**Appendix Table 7a. AMI Propensity Score Model for Admission to a Major Teaching Hospital**

The model was estimated on the AMI matching population (N=281,112), using binary logistic regression (c=0.77).

| Variable                                                 | Estimate (SE) | Odds Ratio (95% CI) | Chi Sq   | P      |
|----------------------------------------------------------|---------------|---------------------|----------|--------|
| Intercept                                                | -3.98 (0.17)  | 0.00 (0.00, 0.00)   | 547.5    | <.0001 |
| <i>Patient Demographics</i>                              |               |                     |          |        |
| Age (years)                                              | 0.00 (0.00)   | 1.00 (1.00, 1.01)   | 0.0      | 0.82   |
| Age 65-69 (reference)                                    | --            | --                  | --       | --     |
| Age 70-74                                                | -0.04 (0.02)  | 0.97 (0.92, 1.01)   | 2.7      | 0.10   |
| Age 75-79                                                | -0.05 (0.03)  | 0.95 (0.89, 1.01)   | 3.2      | 0.07   |
| Age 80-84                                                | -0.07 (0.04)  | 0.93 (0.86, 1.01)   | 3.0      | 0.08   |
| Age 85+                                                  | -0.04 (0.06)  | 0.97 (0.86, 1.08)   | 0.4      | 0.53   |
| Sex (male)                                               | 0.07 (0.01)   | 1.08 (1.05, 1.10)   | 39.8     | <.0001 |
| Race- White (reference)                                  | --            | --                  | --       | --     |
| Race- Black                                              | 1.24 (0.02)   | 3.47 (3.35, 3.59)   | 4,741.7  | <.0001 |
| Race- Hispanic                                           | 0.83 (0.02)   | 2.30 (2.19, 2.41)   | 1,124.2  | <.0001 |
| Race- Other                                              | 0.69 (0.03)   | 1.99 (1.88, 2.11)   | 529.7    | <.0001 |
| Year 2012 (reference)                                    | --            | --                  | --       | --     |
| Year 2013                                                | 0.00 (0.01)   | 1.00 (0.98, 1.03)   | 0.0      | 0.86   |
| Year 2014                                                | -0.01 (0.02)  | 0.99 (0.96, 1.02)   | 0.7      | 0.40   |
| Emergent Type Admission                                  | 1.13 (0.02)   | 3.10 (3.00, 3.21)   | 4,575.5  | <.0001 |
| Treatment at another hospital's ED                       | 0.74 (0.11)   | 2.09 (1.70, 2.57)   | 48.7     | <.0001 |
| Prior SNF Stay                                           | -0.21 (0.11)  | 0.81 (0.66, 1.01)   | 3.6      | 0.06   |
| Prior ASC Visit                                          | -2.48 (0.26)  | 0.08 (0.05, 0.14)   | 89.1     | <.0001 |
| Prior Intermediate Care Stay                             | 0.25 (0.22)   | 1.28 (0.83, 1.99)   | 1.2      | 0.27   |
| Prior Dialysis Visit                                     | -0.32 (0.08)  | 0.73 (0.62, 0.85)   | 15.4     | <.0001 |
| Region- South (Reference)                                | --            | --                  | --       | --     |
| Region- Northeast                                        | 1.91 (0.02)   | 6.76 (6.55, 6.98)   | 14,017.9 | <.0001 |
| Region- Midwest                                          | 1.48 (0.02)   | 4.41 (4.26, 4.55)   | 7,734.2  | <.0001 |
| Region- Pacific                                          | 0.29 (0.03)   | 1.34 (1.28, 1.41)   | 131.9    | <.0001 |
| Region- Rockies                                          | 0.07 (0.04)   | 1.07 (1.00, 1.16)   | 3.6      | 0.06   |
| <i>Principal Diagnoses</i>                               |               |                     |          |        |
| STEMI Type 1                                             | 0.10 (0.02)   | 1.11 (1.06, 1.15)   | 23.2     | <.0001 |
| STEMI Type 2                                             | 0.13 (0.02)   | 1.14 (1.10, 1.18)   | 58.6     | <.0001 |
| NSTEMI or unspecified MI (reference)                     | --            | --                  | --       | --     |
| <i>Comorbidities</i>                                     |               |                     |          |        |
| History of PTCA                                          | 0.09 (0.02)   | 1.09 (1.05, 1.14)   | 16.5     | <.0001 |
| History of CABG                                          | -0.04 (0.02)  | 0.96 (0.92, 1.00)   | 3.2      | 0.07   |
| Heart Failure                                            | 0.05 (0.02)   | 1.05 (1.02, 1.09)   | 11.5     | 0.00   |
| Myocardial Infarction                                    | -0.31 (0.02)  | 0.73 (0.71, 0.76)   | 265.4    | <.0001 |
| Unstable Angina                                          | 0.16 (0.02)   | 1.18 (1.14, 1.22)   | 80.2     | <.0001 |
| Cardio-respiratory Failure or Shock                      | -0.07 (0.02)  | 0.93 (0.89, 0.98)   | 9.2      | 0.00   |
| Valvular Heart Disease                                   | -0.06 (0.01)  | 0.94 (0.92, 0.97)   | 22.8     | <.0001 |
| Hypertension                                             | 0.00 (0.02)   | 1.00 (0.96, 1.04)   | 0.0      | 0.90   |
| Stroke                                                   | 0.04 (0.03)   | 1.04 (0.99, 1.10)   | 2.8      | 0.10   |
| Cerebrovascular Disease                                  | 0.05 (0.02)   | 1.06 (1.02, 1.09)   | 10.8     | 0.00   |
| Renal Failure                                            | 0.01 (0.02)   | 1.01 (0.98, 1.04)   | 0.2      | 0.69   |
| COPD                                                     | -0.27 (0.01)  | 0.77 (0.75, 0.79)   | 383.4    | <.0001 |
| Pneumonia; pleural effusion/pneumothorax                 | 0.01 (0.01)   | 1.01 (0.98, 1.04)   | 0.1      | 0.73   |
| Diabetes                                                 | 0.00 (0.01)   | 1.00 (0.98, 1.03)   | 0.1      | 0.71   |
| Malnutrition                                             | 0.12 (0.03)   | 1.13 (1.07, 1.19)   | 22.9     | <.0001 |
| Dementia or other specified brain disorders              | -0.07 (0.02)  | 0.93 (0.90, 0.96)   | 19.0     | <.0001 |
| Hemiplegia, paraplegia, paralysis, functional disability | -0.02 (0.03)  | 0.98 (0.93, 1.03)   | 0.8      | 0.37   |
| Vascular disease and complications                       | 0.15 (0.01)   | 1.16 (1.13, 1.20)   | 116.4    | <.0001 |
| Cancer                                                   | 0.15 (0.03)   | 1.16 (1.09, 1.23)   | 25.6     | <.0001 |
| Trauma; other injuries                                   | 0.08 (0.01)   | 1.09 (1.06, 1.12)   | 38.5     | <.0001 |

| <b>Variable</b>                                                | <b>Estimate (SE)</b> | <b>Odds Ratio<br/>(95% CI)</b> | <b>Chi Sq</b> | <b>P</b> |
|----------------------------------------------------------------|----------------------|--------------------------------|---------------|----------|
| Major psychiatric disorders                                    | 0.02 (0.02)          | 1.02 (0.98, 1.07)              | 1.0           | 0.33     |
| Chronic Liver Disease                                          | 0.31 (0.04)          | 1.36 (1.25, 1.48)              | 48.4          | <.0001   |
| Severe hematological disorders                                 | 0.04 (0.05)          | 1.05 (0.95, 1.16)              | 0.7           | 0.39     |
| Iron deficiency or other/unspecified anemias and blood disease | 0.12 (0.01)          | 1.12 (1.10, 1.15)              | 90.6          | <.0001   |
| Depression                                                     | 0.01 (0.02)          | 1.02 (0.98, 1.05)              | 0.8           | 0.38     |
| Parkinson's and Huntington's diseases                          | -0.02 (0.04)         | 0.98 (0.91, 1.06)              | 0.2           | 0.63     |
| Seizure disorders and convulsions                              | 0.05 (0.03)          | 1.05 (0.99, 1.11)              | 2.7           | 0.10     |
| Fibrosis of lung or other chronic lung disorders               | -0.10 (0.03)         | 0.91 (0.86, 0.96)              | 12.2          | 0.00     |
| Asthma                                                         | 0.20 (0.02)          | 1.22 (1.17, 1.28)              | 77.8          | <.0001   |

**Appendix Table 7b. HF Propensity Score Model for Admission to a Major Teaching Hospital**

The model was estimated on the HF matching population (N=443,715), using binary logistic regression (c=0.66).

| Variable                                                 | Estimate (SE) | Odds Ratio (95% CI) | Chi Sq  | P      |
|----------------------------------------------------------|---------------|---------------------|---------|--------|
| Intercept                                                | -1.99 (0.11)  | 0.00 (0.00, 0.00)   | 323.6   | <.0001 |
| <i>Patient Demographics</i>                              |               |                     |         |        |
| Age (years)                                              | 0.00 (0.00)   | 1.00 (1.00, 1.01)   | 5.2     | 0.02   |
| Age 65-69 (reference)                                    | --            | --                  | --      | --     |
| Age 70-74                                                | -0.10 (0.02)  | 0.91 (0.88, 0.94)   | 33.6    | <.0001 |
| Age 75-79                                                | -0.16 (0.02)  | 0.85 (0.81, 0.89)   | 59.0    | <.0001 |
| Age 80-84                                                | -0.20 (0.03)  | 0.82 (0.78, 0.87)   | 51.5    | <.0001 |
| Age 85+                                                  | -0.17 (0.04)  | 0.85 (0.79, 0.91)   | 19.5    | <.0001 |
| Sex (male)                                               | 0.12 (0.01)   | 1.12 (1.11, 1.14)   | 198.2   | <.0001 |
| Race- White (reference)                                  | --            | --                  | --      | --     |
| Race- Black                                              | 0.95 (0.01)   | 2.57 (2.52, 2.63)   | 7,234.2 | <.0001 |
| Race- Hispanic                                           | 0.46 (0.02)   | 1.58 (1.52, 1.63)   | 646.7   | <.0001 |
| Race- Other                                              | 0.66 (0.02)   | 1.94 (1.86, 2.03)   | 822.3   | <.0001 |
| Year 2012 (reference)                                    | --            | --                  | --      | --     |
| Year 2013                                                | -0.01 (0.01)  | 0.99 (0.97, 1.01)   | 1.7     | 0.20   |
| Year 2014                                                | -0.03 (0.01)  | 0.98 (0.96, 1.00)   | 6.2     | 0.01   |
| Emergent Type Admission                                  | 0.53 (0.01)   | 1.70 (1.67, 1.74)   | 2,529.7 | <.0001 |
| Treatment at another hospital's ED                       | 0.40 (0.29)   | 1.49 (0.85, 2.62)   | 1.9     | 0.17   |
| Prior SNF Stay                                           | -0.35 (0.07)  | 0.71 (0.62, 0.81)   | 27.3    | <.0001 |
| Prior ASC Visit                                          | -1.95 (0.18)  | 0.14 (0.10, 0.20)   | 123.8   | <.0001 |
| Prior Intermediate Care Stay                             | 0.31 (0.14)   | 1.37 (1.04, 1.81)   | 4.9     | 0.03   |
| Prior Dialysis Visit                                     | -0.33 (0.06)  | 0.72 (0.65, 0.81)   | 33.2    | <.0001 |
| Region- South or Northeast (Reference)                   | --            | --                  | --      | --     |
| Region- Midwest                                          | 0.43 (0.01)   | 1.54 (1.51, 1.57)   | 2,365.0 | <.0001 |
| Region- Pacific                                          | -0.77 (0.02)  | 0.46 (0.45, 0.48)   | 2,018.0 | <.0001 |
| Region- Rockies                                          | -0.90 (0.03)  | 0.41 (0.39, 0.43)   | 949.9   | <.0001 |
| <i>Principal Diagnoses</i>                               |               |                     |         |        |
| HF with Hypertension                                     | -0.24 (0.03)  | 0.79 (0.74, 0.84)   | 66.0    | <.0001 |
| HF with Chronic Kidney Disease                           | -0.24 (0.02)  | 0.79 (0.76, 0.82)   | 201.8   | <.0001 |
| HF, other (reference)                                    | --            | --                  | --      | --     |
| <i>Comorbidities</i>                                     |               |                     |         |        |
| History of PTCA                                          | 0.01 (0.01)   | 1.01 (0.98, 1.04)   | 0.5     | 0.48   |
| History of CABG                                          | -0.06 (0.01)  | 0.94 (0.92, 0.96)   | 24.3    | <.0001 |
| Heart Failure                                            | 0.19 (0.01)   | 1.21 (1.19, 1.23)   | 424.6   | <.0001 |
| Myocardial Infarction                                    | -0.04 (0.02)  | 0.96 (0.91, 1.00)   | 3.2     | 0.07   |
| Unstable Angina                                          | 0.29 (0.02)   | 1.34 (1.30, 1.38)   | 322.1   | <.0001 |
| Cardio-respiratory Failure or Shock                      | -0.05 (0.01)  | 0.95 (0.93, 0.97)   | 20.5    | <.0001 |
| Valvular Heart Disease                                   | 0.02 (0.01)   | 1.03 (1.01, 1.04)   | 8.9     | 0.00   |
| Hypertension                                             | -0.10 (0.02)  | 0.90 (0.88, 0.93)   | 46.3    | <.0001 |
| Stroke                                                   | 0.13 (0.02)   | 1.14 (1.10, 1.17)   | 66.6    | <.0001 |
| Cerebrovascular Disease                                  | -0.05 (0.01)  | 0.95 (0.93, 0.97)   | 18.2    | <.0001 |
| Renal Failure                                            | -0.03 (0.01)  | 0.97 (0.96, 0.99)   | 8.8     | 0.00   |
| COPD                                                     | -0.31 (0.01)  | 0.74 (0.72, 0.75)   | 1,329.4 | <.0001 |
| Pneumonia; pleural effusion/pneumothorax                 | -0.10 (0.01)  | 0.91 (0.89, 0.92)   | 137.5   | <.0001 |
| Diabetes                                                 | -0.02 (0.01)  | 0.98 (0.96, 0.99)   | 7.3     | 0.01   |
| Malnutrition                                             | -0.02 (0.01)  | 0.98 (0.95, 1.01)   | 2.2     | 0.13   |
| Dementia or other specified brain disorders              | -0.13 (0.01)  | 0.88 (0.86, 0.90)   | 151.8   | <.0001 |
| Hemiplegia, paraplegia, paralysis, functional disability | -0.08 (0.02)  | 0.93 (0.90, 0.96)   | 21.0    | <.0001 |
| Vascular disease and complications                       | 0.20 (0.01)   | 1.22 (1.20, 1.24)   | 511.0   | <.0001 |
| Cancer                                                   | 0.21 (0.02)   | 1.23 (1.18, 1.28)   | 116.3   | <.0001 |
| Trauma; other injuries                                   | 0.04 (0.01)   | 1.04 (1.02, 1.06)   | 16.7    | <.0001 |
| Major psychiatric disorders                              | 0.00 (0.01)   | 1.00 (0.97, 1.03)   | 0.0     | 0.94   |
| Chronic Liver Disease                                    | 0.30 (0.02)   | 1.35 (1.29, 1.41)   | 184.9   | <.0001 |
| Severe hematological disorders                           | 0.11 (0.03)   | 1.12 (1.07, 1.18)   | 18.9    | <.0001 |

| <b>Variable</b>                                                | <b>Estimate (SE)</b> | <b>Odds Ratio<br/>(95% CI)</b> | <b>Chi Sq</b> | <b>P</b> |
|----------------------------------------------------------------|----------------------|--------------------------------|---------------|----------|
| Iron deficiency or other/unspecified anemias and blood disease | 0.04 (0.01)          | 1.04 (1.02, 1.06)              | 18.4          | <.0001   |
| Depression                                                     | 0.07 (0.01)          | 1.07 (1.05, 1.09)              | 41.0          | <.0001   |
| Parkinson's and Huntington's diseases                          | -0.04 (0.03)         | 0.96 (0.91, 1.02)              | 2.0           | 0.16     |
| Seizure disorders and convulsions                              | 0.05 (0.02)          | 1.05 (1.01, 1.09)              | 5.1           | 0.02     |
| Fibrosis of lung or other chronic lung disorders               | -0.06 (0.02)         | 0.94 (0.92, 0.97)              | 15.8          | <.0001   |
| Asthma                                                         | 0.20 (0.01)          | 1.22 (1.19, 1.25)              | 210.1         | <.0001   |
| Intercept                                                      | -1.99 (0.11)         | 0.00 (0.00, 0.00)              | 323.6         | <.0001   |

**Appendix Table 7c. PNA Risk Model for Predicted Cost** The model was estimated on the PNA matching population (N=528,133), using logistic regression (c=0.67).

| Variable                                    | Odds Ratio    |                   | Chi Sq  | P      |
|---------------------------------------------|---------------|-------------------|---------|--------|
|                                             | Estimate (SE) | (95% CI)          |         |        |
| Intercept                                   | -3.04 (0.11)  | 0.00 (0.00, 0.00) | 777.4   | <.0001 |
| <i>Patient Demographics</i>                 |               |                   |         |        |
| Age (years)                                 | 0.01 (0.00)   | 1.01 (1.01, 1.01) | 31.0    | <.0001 |
| Age 65-69 (reference)                       | --            | --                | --      | --     |
| Age 70-74                                   | -0.09 (0.02)  | 0.91 (0.88, 0.94) | 28.6    | <.0001 |
| Age 75-79                                   | -0.18 (0.02)  | 0.84 (0.80, 0.87) | 67.9    | <.0001 |
| Age 80-84                                   | -0.18 (0.03)  | 0.84 (0.79, 0.88) | 42.8    | <.0001 |
| Age 85+                                     | -0.14 (0.04)  | 0.87 (0.81, 0.93) | 14.4    | 0.00   |
| Sex (male)                                  | 0.06 (0.01)   | 1.07 (1.05, 1.08) | 55.7    | <.0001 |
| Race- White (reference)                     | --            | --                | --      | --     |
| Race- Black                                 | 0.92 (0.01)   | 2.52 (2.46, 2.58) | 5,184.3 | <.0001 |
| Race- Hispanic                              | 0.58 (0.02)   | 1.79 (1.73, 1.86) | 1,120.8 | <.0001 |
| Race- Other                                 | 0.75 (0.02)   | 2.12 (2.03, 2.21) | 1,217.2 | <.0001 |
| Year 2012 (reference)                       | --            | --                | --      | --     |
| Year 2013                                   | -0.02 (0.01)  | 0.98 (0.96, 1.00) | 4.9     | 0.03   |
| Year 2014                                   | -0.05 (0.01)  | 0.96 (0.94, 0.98) | 17.5    | <.0001 |
| Emergent Type Admission                     | 0.91 (0.01)   | 2.48 (2.42, 2.54) | 4,806.4 | <.0001 |
| Treatment at another hospital's ED          | 0.25 (0.31)   | 1.28 (0.70, 2.34) | 0.6     | 0.42   |
| Prior SNF Stay                              | -0.15 (0.04)  | 0.86 (0.79, 0.94) | 11.9    | 0.00   |
| Prior ASC Visit                             | -2.00 (0.23)  | 0.14 (0.09, 0.21) | 78.5    | <.0001 |
| Prior Intermediate Care Stay                | 0.09 (0.16)   | 1.10 (0.81, 1.49) | 0.4     | 0.55   |
| Prior Dialysis Visit                        | -0.35 (0.06)  | 0.71 (0.63, 0.79) | 40.0    | <.0001 |
| Region- South or Northeast (Reference)      |               |                   |         |        |
| Region- Midwest                             | 0.36 (0.01)   | 1.43 (1.40, 1.45) | 1,482.2 | <.0001 |
| Region- Pacific                             | -0.71 (0.02)  | 0.49 (0.48, 0.51) | 1,726.0 | <.0001 |
| Region- Rockies                             | -1.17 (0.03)  | 0.31 (0.29, 0.33) | 1,452.8 | <.0001 |
| <i>Principal Diagnoses</i>                  |               |                   |         |        |
| Pneumonia due to anaerobe or GN bacteria    | 0.07 (0.03)   | 1.08 (1.02, 1.13) | 7.7     | 0.01   |
| Haemophilus Influenza pneumonia             | -0.03 (0.08)  | 0.97 (0.83, 1.14) | 0.1     | 0.73   |
| Pneumonia due to Legionnaires' disease      | 1.05 (0.09)   | 2.85 (2.39, 3.40) | 135.9   | <.0001 |
| Pneumonia due to MRSA                       | -0.12 (0.03)  | 0.89 (0.83, 0.95) | 11.7    | 0.00   |
| Pneumonia, other                            | -0.10 (0.01)  | 0.90 (0.88, 0.92) | 85.7    | <.0001 |
| Pneumococcal pneumonia                      | 0.12 (0.04)   | 1.13 (1.04, 1.23) | 8.8     | 0.00   |
| Pneumonia due to Pseudomonas                | 0.13 (0.04)   | 1.14 (1.06, 1.23) | 12.2    | 0.00   |
| Pneumonia due to Streptococcus              | -0.02 (0.07)  | 0.98 (0.85, 1.13) | 0.1     | 0.75   |
| Pneumonia due to Staphylococcus             | -0.06 (0.13)  | 0.94 (0.74, 1.21) | 0.2     | 0.65   |
| Aspiration pneumonia (reference)            | 0             | 0                 | 0       | 0.00   |
| <i>Comorbidities</i>                        |               |                   |         |        |
| History of PTCA                             | -0.04 (0.02)  | 0.96 (0.92, 0.99) | 5.2     | 0.02   |
| History of CABG                             | -0.14 (0.02)  | 0.87 (0.84, 0.90) | 59.0    | <.0001 |
| Heart Failure                               | 0.06 (0.01)   | 1.07 (1.05, 1.09) | 42.7    | <.0001 |
| Myocardial Infarction                       | -0.05 (0.03)  | 0.95 (0.89, 1.01) | 2.6     | 0.11   |
| Unstable Angina                             | 0.34 (0.02)   | 1.40 (1.35, 1.46) | 247.3   | <.0001 |
| Cardio-respiratory Failure or Shock         | -0.03 (0.01)  | 0.97 (0.95, 0.99) | 7.2     | 0.01   |
| Valvular Heart Disease                      | 0.02 (0.01)   | 1.02 (1.00, 1.04) | 3.9     | 0.05   |
| Hypertension                                | -0.07 (0.01)  | 0.93 (0.91, 0.96) | 32.0    | <.0001 |
| Stroke                                      | 0.04 (0.01)   | 1.05 (1.02, 1.08) | 8.9     | 0.00   |
| Cerebrovascular Disease                     | -0.03 (0.01)  | 0.97 (0.95, 1.00) | 5.9     | 0.01   |
| Renal Failure                               | 0.05 (0.01)   | 1.05 (1.03, 1.07) | 22.2    | <.0001 |
| COPD                                        | -0.35 (0.01)  | 0.70 (0.69, 0.72) | 1,632.9 | <.0001 |
| Pneumonia; pleural effusion/pneumothorax    | -0.22 (0.01)  | 0.81 (0.79, 0.82) | 433.6   | <.0001 |
| Diabetes                                    | -0.03 (0.01)  | 0.97 (0.96, 0.99) | 9.3     | 0.00   |
| Malnutrition                                | 0.00 (0.01)   | 1.00 (0.98, 1.02) | 0.0     | 0.94   |
| Dementia or other specified brain disorders | -0.09 (0.01)  | 0.91 (0.89, 0.93) | 89.4    | <.0001 |

| <b>Variable</b>                                                | <b>Estimate (SE)</b> | <b>Odds Ratio<br/>(95% CI)</b> | <b>Chi Sq</b> | <b>P</b> |
|----------------------------------------------------------------|----------------------|--------------------------------|---------------|----------|
| Hemiplegia, paraplegia, paralysis, functional disability       | 0.02 (0.01)          | 1.02 (0.99, 1.05)              | 2.3           | 0.13     |
| Vascular disease and complications                             | 0.22 (0.01)          | 1.24 (1.22, 1.27)              | 577.6         | <.0001   |
| Cancer                                                         | 0.36 (0.01)          | 1.43 (1.39, 1.46)              | 711.4         | <.0001   |
| Trauma; other injuries                                         | 0.06 (0.01)          | 1.06 (1.04, 1.08)              | 41.5          | <.0001   |
| Major psychiatric disorders                                    | 0.01 (0.01)          | 1.01 (0.99, 1.04)              | 1.4           | 0.23     |
| Chronic Liver Disease                                          | 0.27 (0.03)          | 1.31 (1.25, 1.38)              | 110.7         | <.0001   |
| Severe hematological disorders                                 | 0.20 (0.03)          | 1.22 (1.16, 1.28)              | 55.3          | <.0001   |
| Iron deficiency or other/unspecified anemias and blood disease | 0.04 (0.01)          | 1.04 (1.02, 1.06)              | 17.2          | <.0001   |
| Depression                                                     | 0.09 (0.01)          | 1.10 (1.08, 1.12)              | 89.6          | <.0001   |
| Parkinson's and Huntington's diseases                          | 0.04 (0.02)          | 1.04 (1.00, 1.08)              | 4.0           | 0.05     |
| Seizure disorders and convulsions                              | 0.09 (0.02)          | 1.10 (1.07, 1.13)              | 34.7          | <.0001   |
| Fibrosis of lung or other chronic lung disorders               | 0.01 (0.01)          | 1.02 (0.99, 1.04)              | 1.4           | 0.24     |
| Asthma                                                         | 0.21 (0.01)          | 1.23 (1.20, 1.26)              | 262.7         | <.0001   |



## Appendix Table 8. Definitions of Resource Utilization-based Costs and Payments

We defined costs by resource utilization.<sup>14, 30, 31</sup> The algorithm is as follows:

### A. Exclusions for Non-Acute Care

1. Inpatient Hospital (Part A) File
  - a. Exclude claim for hospitalizations in non-acute settings using 6-digit Medicare hospital ID (hospital identified as other than “Short-term (General and Specialty) Hospital” or “Critical Access Hospital”)
    - i. Exclude if the 3<sup>rd</sup> position of the ID is not equal to “0” or if the 3<sup>rd</sup> and 4<sup>th</sup> positions are not equal to “13”
    - ii. Exclude if 4<sup>th</sup>, 5<sup>th</sup>, or 6<sup>th</sup> position in identifier is not a number
  - b. Exclude claim if DRG = 945 or 946 (Rehabilitation)
2. Outpatient File
  - a. Exclude claim for encounters in non-acute settings using 6-digit Medicare hospital ID (hospital identified as other than “Short-term (General and Specialty) Hospital” or “Critical Access Hospital”)
    - i. Exclude if the 3<sup>rd</sup> position of the ID is not equal to “0” or if the 3<sup>rd</sup> and 4<sup>th</sup> positions are not equal to “13”
    - ii. Exclude if 4<sup>th</sup>, 5<sup>th</sup>, or 6<sup>th</sup> position in identifier is not a number
  - b. Exclude claim if principal diagnosis = V57 or subterms (Care involving use of rehabilitation procedures)
3. Physician/Carrier (Part B) File
  - a. Exclude any claim if the from and through dates fall on or between the admission and discharge dates of a non-acute hospitalization (as defined above) or between the from and through dates of a claim for outpatient care in a non-acute hospital
  - b. Exclude claim if no line item place of service codes from the following list appear:
 

|                                                 |                                          |
|-------------------------------------------------|------------------------------------------|
| 11 = Office                                     | 15 = Mobile Unit                         |
| 20 = Urgent Care Facility                       | 21 = Inpatient hospital                  |
| 22 = Outpatient hospital                        | 23 = Emergency room - hospital           |
| 24 = Ambulatory surgical center                 | 41 = Ambulance - land                    |
| 42 = Ambulance - air or water                   | 50 = Federally qualified health centers  |
| 65 = End stage renal disease treatment facility | 71 = State or local public health clinic |
| 81 = Independent laboratory                     |                                          |
  - c. Exclude claim if principal diagnosis = V57 or subterms (Care involving use of rehabilitation procedures)

### B. Resource Utilization-Based Cost Accounting

#### 1. Facility and Accommodation Costs from the Inpatient File:

- a. Accommodations:
  - i. Determine number of inpatient critical care and non-critical care days from revenue centers in the Inpatient file.
  - ii. Multiply number of critical care/intermediate care/non-critical care days by average daily cost for each type (adjust to 2014 values using the Bureau of Labor & Statistics inflation factor, hospital component - CCM: \$4,738.58; IC: \$3,145.81; Non-CCM: \$1,553.04)

| Revenue Centers for:                              |                              |                               |
|---------------------------------------------------|------------------------------|-------------------------------|
| Non-Critical Care                                 | Intermediate Care            | Critical Care                 |
| 0100-0101 All-inclusive rate-room and board       | 0206, 0214 Intermediate Care | 0200-0205 Intensive care      |
| 0110-0119 Private medical or general              |                              | 0207-0209 Intensive Care      |
| 0120-0129 Semi-private 2 bed (medical or general) |                              | 0210-0213, 0219 Coronary care |
| 0130-0139 Semi-private 3 and 4 beds               |                              |                               |
| 0140-0149 Private (deluxe)                        |                              |                               |
| 0150-0159 Room & Board ward (medical or general)  |                              |                               |
| 0160, 0164, 0167, 0169 Other Room & Board         |                              |                               |

- b. Operating Room Time Cost (index admission only)
  - i. Determine operating room time using “best anesthesia chart time,” if available; If best anesthesia time missing, use claim anesthesia time from Physician/Carrier (Part B) file; if both best chart time and claim time missing, assign each patient median best anesthesia time by procedure
  - ii. Multiply anesthesia time by mean of OR time cost range and inflate to 2014 dollars (\$24.29/minute)

- c. Emergency Room Visit Fixed Costs (post-discharge only)
    - i. For post-discharge Part B records only, separate records into line items and locate place of service code 23 (“Emergency Room – Hospital”)
    - ii. Treat each unique ER date as separate visit, sum visits per patient
  - d. Multiply by average ER visit cost, inflated to 2014 dollars (\$593.55)
- 2. Service Costs from Carrier/Part B and Outpatient Files: (Note: Office visits, Home Care, SNF, and non-ER Outpatient use only section 2 methods)**
- a. Separate line items from Part B (each includes patient ID, CPT code, units count, place of service)
  - b. Anesthesia - if first two digits of CPT code are 00 or 01, code indicates anesthesia billing
    - i. Apply standard CMS base units (2014 list) to each CPT code; if applicable, anesthesia modifier AD reduces base units to 3 per procedure for medical supervision
    - ii. Since time units count reflects anesthesia time in minutes divided by 1.5, divide reported time by 10 to determine number of 15-minute anesthesia time units
    - iii. Add base and time units for each line item, multiply by \$22.68 (un-weighted mean of locality conversion factors, number needs to be revised once national CF available); If applicable, anesthesia modifier QK reduces total AVUs by 50% of allowed rate for medical direction of multiple procedures
    - iv. Sum anesthesia line item costs by patient
  - c. Other Services - apply method to all non-anesthesia Part B line items
    - i. Merge line item CPT with AMA CPT/RVU list (2014 file) to determine RVU for each
    - ii. Using place of service codes, determine whether facility or non-facility RVU is appropriate – for this cost estimate, treat outpatient hospitals as “non-facility” sites of care to adjust for facility component of service costs
    - iii. Multiply RVUs by line item service count (=1 in 99% of non-anesthesia cases)
    - iv. Multiply total RVUs by conversion factor (\$35.82 in 2014)
    - v. Sum line item costs by patient
- 3. Time Frame Under Assessment for Resource Utilization-based Cost Accounting:**
- a. In-hospital costs account for all patient claims during the time period of the index hospitalization
  - b. 30-day costs account for all in-hospital costs, plus any other bills (ER visits, and any bills in the Outpatient and Carrier/Part B files) that occurred within 30 days of admission, and any bills accrued during the entirety of any readmission that began within 30 days of admission.

**4. Summary Equation:**

$$C_{i,30} = (D_{inp}^{CC} * 4,738.58 + D_{inp}^{IC} * 3,145.81 + D_{inp}^{NCC} * 1,553.04) + (T_{OR} * 24.29) + AU * 22.68 + ER * 593.55 + \sum RVU_j * 35.82 + RC$$

$D_{inp}^{CC}$  = Number of days in critical care

$D_{inp}^{IC}$  = Number of days in intermediate care

$D_{inp}^{NCC}$  = Number of days on hospital floor

$T_{OR}$  = Number of minutes in operating room

AU = Number of anesthesia units

ER = Number of emergency room days

$RVU_j$  = Number of all j RVUs from all bills over defined time period that includes all outpatient and office visits

RC = Readmission costs—all costs associated with hospitalization that began within 30 days of readmission

**C. Payments Calculation Steps**

Inpatient Hospital (Part A) File

- Components
  - Payment Made by Medicare: Claim Payment Amount (SAS alias: CLM\_PMT\_AMT) + (Claim Pass Through Per Diem Amount for Pass-Through Expenses such as capital costs, DME costs, kidney acquisition costs, and bad debts [SAS alias: CLM\_PASS\_THRU\_PER\_DIEM\_AMT] \* Claim Utilization Day Count (SAS alias: CLM\_UTLZTN\_DAY\_CNT))
  - Payment Made by Beneficiary: NCH Beneficiary Inpatient Deductible Amount (SAS alias: NCH\_BENE\_IP\_DDCTBL\_AMT) + NCH Beneficiary Part A Coinsurance Liability Amount (SAS alias: NCH\_BENE\_PTA\_COINSRNC\_LBLTY\_AM) + NCH Beneficiary Blood Deductible Liability Amount (SAS alias: NCH\_BENE\_BLOOD\_DDCTBL\_LBLTY\_AM)

- Payment Made by Primary Payer (non-Medicare): NCH Primary Payer Claim Paid Amount (SAS alias: NCH\_PRMRY\_PYR\_CLM\_PD\_AMT)
- Inpatient Payment = CLM\_PMT\_AMT + (CLM\_PASS\_THRU\_PER\_DIEM\_AMT \* CLM\_UTLZTN\_DAY\_CNT) + NCH\_BENE\_IP\_DDCTBL\_AMT + NCH\_BENE\_PTA\_COINSRNC\_LBLTY\_AM + NCH\_BENE\_BLOOD\_DDCTBL\_LBLTY\_AM + NCH\_PRMRY\_PYR\_CLM\_PD\_AMT

#### Outpatient File

- Components
  - Payment Made by Medicare: Claim Payment Amount (SAS alias: CLM\_PMT\_AMT)
  - Payment Made by Beneficiary: NCH Beneficiary Part B Coinsurance Liability Amount (SAS alias: NCH\_BENE\_PTB\_COINSRNC\_AMT) + NCH Beneficiary Part B Deductible Amount (SAS alias: NCH\_BENE\_PTB\_DDCTBL\_AMT) + NCH Beneficiary Blood Deductible Liability Amount (SAS alias: NCH\_BENE\_BLOOD\_DDCTBL\_LBLTY\_AM)
  - Payment Made by Primary Payer (non-Medicare): NCH Primary Payer Claim Paid Amount (SAS alias: NCH\_PRMRY\_PYR\_CLM\_PD\_AMT)
- Outpatient Payment = CLM\_PMT\_AMT + NCH\_BENE\_PTB\_COINSRNC\_AMT + NCH\_BENE\_PTB\_DDCTBL\_AMT + NCH\_BENE\_BLOOD\_DDCTBL\_LBLTY\_AM + NCH\_PRMRY\_PYR\_CLM\_PD\_AMT

#### Physician/Carrier (Part B) Line File

- Components
  - Payment Made by Medicare: Claim Payment Amount (SAS alias: CLM\_PMT\_AMT)
  - Payment Made by Beneficiary: Carrier Claim Cash Deductible Applied Amount (SAS alias: CARR\_CLM\_CASH\_DDCTBL\_APLD\_AMT) + SUM of Line Coinsurance Amount (SAS alias: LINE\_COINSRNC\_AMT)
  - Payment Made by Primary Payer (non-Medicare): Carrier Claim Payer Paid Amount (SAS alias: CARR\_CLM\_PRMRY\_PYR\_PD\_AMT)
- Part B Payment = CLM\_PMT\_AMT + CARR\_CLM\_CASH\_DDCTBL\_APLD\_AMT + LINE\_COINSRNC\_AMT + CARR\_CLM\_PRMRY\_PYR\_PD\_AMT

#### Basic Total Payments

- Merge together the IP, OP, and PB payment amounts for each patient and sum all items.
- Inflate payments to 2014 dollars.

**Payments without Geographic Adjustment:** to avoid punishing hospitals located in high-cost areas and or reward hospitals for being in low-cost areas.

#### Part A Adjustment:

- Assign the geographic adjustment to each hospital
  - Find Geographic Adjustment Factors (GAF) for 2012-2014 by Medicare locality<sup>49-51</sup>
  - Assign a GAF to each census based statistical area (CBSA), based on the Medicare locality number, and then assign GAF's to hospitals based on the hospital's CBSA
    - Hospitals not linked to CBSAs are assigned their state's "Rest of State" GAF
- Identify the Operating Labor Base Payment, Operating Non-labor Base Payment, and Capital Base Payment using the relevant year's CMS Final Rule.
  - Identify the Wage Index for each hospital
    - Find the Wage Indices by CBSA for 2012-2014 using the year's CMS Final Rule.
    - Assign each hospital the wage index of their geographic CBSA or their reclassified CBSA, if applicable.
  - Identify the Quality Indicator for each hospital for 2012-2014 using the CMS Provider Specific File.<sup>52</sup>
  - Use the year and hospital-specific assigned Wage Index and Quality indicator to determine the Base Operating Labor, Base Operating Non-Labor, and Base Capital Payment Amounts
- Apply the geographic adjustment to each patient's operating labor base payments
  - Geographically-unadjusted inpatient payments are calculated as total payments + [(1-GAF) \* Base Operating Labor Amount \* DRG Weight] + {[(1/GAF)-1] \* Total Capital Payment Amount}

Part B Adjustment:

- Identify all of the CPT and HCPCS codes on the Part B/Carrier bill
- Find the Work RVU, Practice Expense (PE) RVU, and Malpractice (MP) RVU for each CPT/HCPCS code billed.<sup>53</sup>
- Identify the Work Geographic Practice Cost Index (GPCI), PE GPCI, and MP GPCI that corresponds to the provider's state and carrier number on the claim.
- Identify the yearly Conversion Factor (CF) of RVUs to dollars.
- Make the adjustment and inflate to 2015 dollars.
- The Part B payment without geographic adjustment is

$$= \text{Total Part B Payment} + CF * [\sum RVUs_{Work}(1 - GPCI_{Work}) + \sum RVUs_{PE}(1 - GPCI_{PE}) + \sum RVUs_{MP}(1 - GPCI_{MP})]$$

**Payments without Indirect Medical Education Component:** to avoid punishing hospitals participating in graduate medical education.

- Subtract from the Inpatient Payment the Claim PPS Capital Indirect Medical Education (IME) Amount (SAS Alias: CLM\_PPS\_CPTL\_IME\_AMT) and the Operating Indirect Medical Education (IME) Amount (SAS Alias: IME\_OP\_CLM\_VAL\_AMT).

$$\text{Payment without IME} = \text{Total Payment} - (\text{CLM\_PPS\_CPTL\_IME\_AMT} + \text{IME\_OP\_CLM\_VAL\_AMT})$$

**Payments without Geography Adjustment or IME**

$$\begin{aligned} \text{Payments without Geo or IME} = & \text{Total Payment} + [(1 - GAF) * \text{CLM\_BASE\_OPRTG\_DRG\_AMT} * \\ & \text{CLM\_PPS\_CPTL\_DRG\_WT\_NUM}] + \{[(1/GAF) - 1] * \text{CLM\_TOT\_PPS\_CPTL\_AMT}\} - [(1/GAF) * \\ & \text{CLM\_PPS\_CPTL\_IME\_AMT}] - \text{IME\_OP\_CLM\_VAL\_AMT} + CF * [\sum RVUs_{Work}(1 - GPCI_{Work}) + \sum RVUs_{PE}(1 - GPCI_{PE}) + \\ & \sum RVUs_{MP}(1 - GPCI_{MP})] \end{aligned}$$

**Payments without Disproportionate Share Hospital (DSH):** removes the CMS payments made to Disproportionate Share Hospitals for high rates of Medicaid or indigent care.

- Subtract from the Inpatient Payment the operating DSH payment (DSH\_OP) and capital DSH Payment (SAS Alias: DSP\_SHR)

$$\text{Payments without DSH} = \text{Total Payment} - (\text{DSH\_OP\_CLM\_VAL\_AMT} + \text{CLM\_PPS\_CPTL\_DSPRPRTNT\_SHR\_AMT})$$

**Payments without Geography Adjustment or DSH**

$$\begin{aligned} \text{Payments without Geo or DSH} = & \text{Total Payment} + [(1 - GAF) * \text{CLM\_BASE\_OPRTG\_DRG\_AMT} * \\ & \text{CLM\_PPS\_CPTL\_DRG\_WT\_NUM}] + \{[(1/GAF) - 1] * \text{CLM\_TOT\_PPS\_CPTL\_AMT}\} - [(1/GAF) * \\ & \text{CLM\_PPS\_CPTL\_DSPRPRTNT\_SHR\_AMT}] - \text{DSH\_OP\_CLM\_VAL\_AMT} + CF * [\sum RVUs_{Work}(1 - GPCI_{Work}) + \\ & \sum RVUs_{PE}(1 - GPCI_{PE}) + \sum RVUs_{MP}(1 - GPCI_{MP})] \end{aligned}$$

**Payments without Geo, IME or DSH**

$$\begin{aligned} = & \text{Total Payment} + \left[ (1 - GAF) * \text{CLM}_{\text{BASEOPRTGDRGAMT}} * \text{CLM}_{\text{PPSCPTLDRGWTNUM}} \right] \\ & + \left\{ \left[ \left( \frac{1}{GAF} \right) - 1 \right] * \text{CLM}_{\text{TOTPPSCPTLAMT}} \right\} - \left[ \left( \frac{1}{GAF} \right) * \left( \text{CLM}_{\text{PPSCPTLIMEAMT}} + \text{CLM}_{\text{PPSCPTLDSRPRTNTSHRAMT}} \right) \right] \\ & - \left( \text{IME}_{\text{OPCLMVALAMT}} + \text{DSH}_{\text{OPCLMVALAMT}} \right) + CF \\ & * \left[ \sum RVUs_{Work}(1 - GPCI_{Work}) + \sum RVUs_{PE}(1 - GPCI_{PE}) + \sum RVUs_{MP}(1 - GPCI_{MP}) \right] \end{aligned}$$

**Appendix Table 9. Complete Matching Table for Combined Medical Conditions** The table below reports balance before and after matching between patients admitted to major teaching or non-teaching hospitals for AMI, HF, and Pneumonia. All covariates met balance criteria.

| <b>Variable</b>                        | <b>All Major Teaching Cases<br/>N=203,922</b> | <b>Matched Major Teaching Cases<br/>N=203,922</b> | <b>Matched Non-Teaching Controls<br/>N=203,922</b> | <b>All Non-Teaching Controls<br/>N=1,049,037</b> | <b>Std. Diff Before Match</b> | <b>P-value Before Match</b> | <b>Std. Diff After Match</b> | <b>P-value After Match</b> |
|----------------------------------------|-----------------------------------------------|---------------------------------------------------|----------------------------------------------------|--------------------------------------------------|-------------------------------|-----------------------------|------------------------------|----------------------------|
| Number of Hospitals                    | 339                                           | 339                                               | 2,439                                              | 2,533                                            |                               |                             |                              |                            |
| <b>Demographics</b>                    |                                               |                                                   |                                                    |                                                  |                               |                             |                              |                            |
| Sex (% male)                           | 97,360 (47.74%)                               | 97,360 (47.74%)                                   | 98,039 (48.08%)                                    | 498,002 (47.47%)                                 | 0.01                          | 0.0248                      | -0.01                        | 0.0336                     |
| Age (mean)                             | 80.1                                          | 80.1                                              | 80.1                                               | 80.1                                             | 0.00                          | 0.0693                      | 0.00                         | 0.0289                     |
| Age 65-69                              | 29,483 (14.46%)                               | 29,483 (14.46%)                                   | 28,837 (14.14%)                                    | 139,579 (13.31%)                                 | 0.03                          | <.0001                      | 0.01                         | 0.0039                     |
| Age 70-74                              | 32,703 (16.04%)                               | 32,703 (16.04%)                                   | 32,414 (15.90%)                                    | 169,136 (16.12%)                                 | 0.00                          | 0.3348                      | 0.00                         | 0.2183                     |
| Age 75-79                              | 34,018 (16.68%)                               | 34,018 (16.68%)                                   | 34,114 (16.73%)                                    | 183,774 (17.52%)                                 | -0.02                         | <.0001                      | 0.00                         | 0.6901                     |
| Age 80-84                              | 37,466 (18.37%)                               | 37,466 (18.37%)                                   | 38,289 (18.78%)                                    | 203,036 (19.35%)                                 | -0.03                         | <.0001                      | -0.01                        | 0.0009                     |
| Age 85+                                | 70,252 (34.45%)                               | 70,252 (34.45%)                                   | 70,268 (34.46%)                                    | 353,512 (33.70%)                                 | 0.02                          | <.0001                      | 0.00                         | 0.9606                     |
| Year (mean)                            | 2013.1                                        | 2013.1                                            | 2013.1                                             | 2013.1                                           | -0.01                         | <.0001                      | 0.00                         | 0.8572                     |
| Year 2012                              | 50,501 (24.76%)                               | 50,501 (24.76%)                                   | 49,908 (24.47%)                                    | 253,782 (24.19%)                                 | 0.01                          | <.0001                      | 0.01                         | 0.0314                     |
| Year 2013                              | 85,944 (42.15%)                               | 85,944 (42.15%)                                   | 86,982 (42.65%)                                    | 444,735 (42.39%)                                 | -0.01                         | 0.0374                      | -0.01                        | 0.0010                     |
| Year 2014                              | 67,477 (33.09%)                               | 67,477 (33.09%)                                   | 67,032 (32.87%)                                    | 350,520 (33.41%)                                 | -0.01                         | 0.0045                      | 0.00                         | 0.1392                     |
| Race- non-Hispanic White               | 148,135 (72.64%)                              | 148,135 (72.64%)                                  | 152,953 (75.01%)                                   | 893,590 (85.18%)                                 | -0.31                         | <.0001                      | -0.06                        | <.0001                     |
| Race- Black                            | 35,907 (17.61%)                               | 35,907 (17.61%)                                   | 32,672 (16.02%)                                    | 74,891 (7.14%)                                   | 0.32                          | <.0001                      | 0.05                         | <.0001                     |
| Race- Hispanic                         | 12,126 (5.95%)                                | 12,126 (5.95%)                                    | 10,320 (5.06%)                                     | 49,904 (4.76%)                                   | 0.05                          | <.0001                      | 0.04                         | <.0001                     |
| Race- Other                            | 7,754 (3.80%)                                 | 7,754 (3.80%)                                     | 7,977 (3.91%)                                      | 30,652 (2.92%)                                   | 0.05                          | <.0001                      | -0.01                        | 0.0710                     |
| Emergent type admission                | 178,803 (87.68%)                              | 178,803 (87.68%)                                  | 177,481 (87.03%)                                   | 792,212 (75.52%)                                 | 0.32                          | <.0001                      | 0.02                         | <.0001                     |
| Treatment at another hospital's ED     | 150 (0.07%)                                   | 150 (0.07%)                                       | 143 (0.07%)                                        | 872 (0.08%)                                      | 0.00                          | 0.1749                      | 0.00                         | 0.7259                     |
| Prior care at SNF                      | 1,059 (0.52%)                                 | 1,059 (0.52%)                                     | 1,252 (0.61%)                                      | 6,141 (0.59%)                                    | -0.01                         | 0.0003                      | -0.01                        | 0.0001                     |
| Prior care at ASC                      | 189 (0.09%)                                   | 189 (0.09%)                                       | 187 (0.09%)                                        | 8,669 (0.83%)                                    | -0.11                         | <.0001                      | 0.00                         | 0.9589                     |
| Prior intermediate care facility visit | 352 (0.17%)                                   | 352 (0.17%)                                       | 292 (0.14%)                                        | 9,661 (0.92%)                                    | -0.10                         | <.0001                      | 0.00                         | 0.0199                     |
| Prior dialysis visit                   | 1,154 (0.57%)                                 | 1,154 (0.57%)                                     | 1,058 (0.52%)                                      | 7,772 (0.74%)                                    | -0.02                         | <.0001                      | 0.01                         | 0.0428                     |
| Region Northeast                       | 99,972 (49.02%)                               | 99,972 (49.02%)                                   | 99,598 (48.84%)                                    | 214,946 (20.49%)                                 | 0.63                          | <.0001                      | 0.00                         | 0.2426                     |
| Region Midwest                         | 62,029 (30.42%)                               | 62,029 (30.42%)                                   | 60,560 (29.70%)                                    | 234,676 (22.37%)                                 | 0.18                          | <.0001                      | 0.02                         | <.0001                     |
| Region Pacific                         | 11,318 (5.55%)                                | 11,318 (5.55%)                                    | 12,310 (6.04%)                                     | 117,693 (11.22%)                                 | -0.21                         | <.0001                      | -0.02                        | <.0001                     |
| Region South                           | 27,173 (13.33%)                               | 27,173 (13.33%)                                   | 28,035 (13.75%)                                    | 428,109 (40.81%)                                 | -0.65                         | <.0001                      | -0.01                        | 0.0001                     |
| Region Rockies                         | 3,430 (1.68%)                                 | 3,430 (1.68%)                                     | 3,419 (1.68%)                                      | 53,613 (5.11%)                                   | -0.19                         | <.0001                      | 0.00                         | 0.9030                     |
| <b>Admission Conditions</b>            |                                               |                                                   |                                                    |                                                  |                               |                             |                              |                            |
| STEMI Type 1                           | 3,557 (1.74%)                                 | 3,557 (1.74%)                                     | 3,557 (1.74%)                                      | 18,771 (1.79%)                                   | 0.00                          | 0.1617                      | 0.00                         | 1.0000                     |
| STEMI Type 2                           | 5,576 (2.73%)                                 | 5,576 (2.73%)                                     | 5,576 (2.73%)                                      | 28,931 (2.76%)                                   | 0.00                          | 0.5591                      | 0.00                         | 1.0000                     |
| NSTEMI or unspecified MI               | 34,857 (17.09%)                               | 34,857 (17.09%)                                   | 34,857 (17.09%)                                    | 189,420 (18.06%)                                 | -0.03                         | <.0001                      | 0.00                         | 1.0000                     |

| <b>Variable</b>                                          | <b>All Major Teaching Cases</b><br>N=203,922 | <b>Matched Major Teaching Cases</b><br>N=203,922 | <b>Matched Non-Teaching Controls</b><br>N=203,922 | <b>All Non-Teaching Controls</b><br>N=1,049,037 | <b>Std. Diff Before Match</b> | <b>P-value Before Match</b> | <b>Std. Diff After Match</b> | <b>P-value After Match</b> |
|----------------------------------------------------------|----------------------------------------------|--------------------------------------------------|---------------------------------------------------|-------------------------------------------------|-------------------------------|-----------------------------|------------------------------|----------------------------|
| Pneumonia Due to Anaerobes or Gram-Negative Bacteria     | 2,155 (1.06%)                                | 2,155 (1.06%)                                    | 2,155 (1.06%)                                     | 11,129 (1.06%)                                  | 0.00                          | 0.8779                      | 0.00                         | 1.0000                     |
| Aspiration Pneumonia                                     | 14,909 (7.31%)                               | 14,909 (7.31%)                                   | 14,909 (7.31%)                                    | 79,901 (7.62%)                                  | -0.01                         | <.0001                      | 0.00                         | 1.0000                     |
| Pneumonia Due to H. Influenza                            | 176 (0.09%)                                  | 176 (0.09%)                                      | 176 (0.09%)                                       | 1,297 (0.12%)                                   | -0.01                         | <.0001                      | 0.00                         | 1.0000                     |
| Legionnaire's Disease                                    | 206 (0.10%)                                  | 206 (0.10%)                                      | 206 (0.10%)                                       | 403 (0.04%)                                     | 0.02                          | <.0001                      | 0.00                         | 1.0000                     |
| Pneumonia Due to MRSA                                    | 1,148 (0.56%)                                | 1,148 (0.56%)                                    | 1,148 (0.56%)                                     | 8,121 (0.77%)                                   | -0.03                         | <.0001                      | 0.00                         | 1.0000                     |
| Pneumonia, Other                                         | 51,556 (25.28%)                              | 51,556 (25.28%)                                  | 51,556 (25.28%)                                   | 331,408 (31.59%)                                | -0.14                         | <.0001                      | 0.00                         | 1.0000                     |
| Pneumococcal Pneumonia                                   | 774 (0.38%)                                  | 774 (0.38%)                                      | 774 (0.38%)                                       | 4,280 (0.41%)                                   | 0.00                          | <.0001                      | 0.00                         | 1.0000                     |
| Pneumonia Due to Pseudomonas                             | 918 (0.45%)                                  | 918 (0.45%)                                      | 918 (0.45%)                                       | 5,405 (0.52%)                                   | -0.01                         | <.0001                      | 0.00                         | 1.0000                     |
| Streptococcal Pneumoniae                                 | 233 (0.11%)                                  | 233 (0.11%)                                      | 233 (0.11%)                                       | 1,427 (0.14%)                                   | -0.01                         | 0.0126                      | 0.00                         | 1.0000                     |
| Staphylococcal Pneumonia                                 | 75 (0.04%)                                   | 75 (0.04%)                                       | 75 (0.04%)                                        | 498 (0.05%)                                     | -0.01                         | 0.0414                      | 0.00                         | 1.0000                     |
| Viral Pneumonia                                          | 2,797 (1.37%)                                | 2,797 (1.37%)                                    | 2,797 (1.37%)                                     | 9,317 (0.89%)                                   | 0.05                          | <.0001                      | 0.00                         | 1.0000                     |
| HF with Chronic Kidney Disease                           | 5,773 (2.83%)                                | 5,773 (2.83%)                                    | 5,773 (2.83%)                                     | 17,169 (1.64%)                                  | 0.08                          | <.0001                      | 0.00                         | 1.0000                     |
| HF with Hypertension                                     | 2,270 (1.11%)                                | 2,270 (1.11%)                                    | 2,270 (1.11%)                                     | 9,111 (0.87%)                                   | 0.02                          | <.0001                      | 0.00                         | 1.0000                     |
| HF, Other                                                | 76,942 (37.73%)                              | 76,942 (37.73%)                                  | 76,942 (37.73%)                                   | 332,449 (31.69%)                                | 0.13                          | <.0001                      | 0.00                         | 1.0000                     |
| <b>Comorbidities</b>                                     |                                              |                                                  |                                                   |                                                 |                               |                             |                              |                            |
| History of PTCA                                          | 15,037 (7.37%)                               | 15,037 (7.37%)                                   | 15,630 (7.66%)                                    | 71,834 (6.85%)                                  | 0.02                          | <.0001                      | -0.01                        | 0.0004                     |
| History of CABG                                          | 18,169 (8.91%)                               | 18,169 (8.91%)                                   | 18,996 (9.32%)                                    | 92,729 (8.84%)                                  | 0.00                          | 0.3066                      | -0.01                        | <.0001                     |
| Heart Failure                                            | 91,059 (44.65%)                              | 91,059 (44.65%)                                  | 91,103 (44.68%)                                   | 415,580 (39.62%)                                | 0.10                          | <.0001                      | 0.00                         | 0.8923                     |
| Myocardial Infarction                                    | 9,107 (4.47%)                                | 9,107 (4.47%)                                    | 8,571 (4.20%)                                     | 52,009 (4.96%)                                  | -0.02                         | <.0001                      | 0.01                         | <.0001                     |
| Unstable Angina                                          | 16,589 (8.13%)                               | 16,589 (8.13%)                                   | 15,588 (7.64%)                                    | 69,694 (6.64%)                                  | 0.06                          | <.0001                      | 0.02                         | <.0001                     |
| Cardio-respiratory Failure or Shock                      | 31,888 (15.64%)                              | 31,888 (15.64%)                                  | 32,240 (15.81%)                                   | 173,453 (16.53%)                                | -0.02                         | <.0001                      | 0.00                         | 0.1311                     |
| Valvular Heart Disease                                   | 73,567 (36.08%)                              | 73,567 (36.08%)                                  | 74,879 (36.72%)                                   | 355,548 (33.89%)                                | 0.05                          | <.0001                      | -0.01                        | <.0001                     |
| Hypertension                                             | 183,257 (89.87%)                             | 183,257 (89.87%)                                 | 182,069 (89.28%)                                  | 934,814 (89.11%)                                | 0.02                          | <.0001                      | 0.02                         | <.0001                     |
| Stroke                                                   | 18,637 (9.14%)                               | 18,637 (9.14%)                                   | 18,218 (8.93%)                                    | 82,449 (7.86%)                                  | 0.05                          | <.0001                      | 0.01                         | 0.0224                     |
| Cerebrovascular Disease                                  | 37,815 (18.54%)                              | 37,815 (18.54%)                                  | 37,168 (18.23%)                                   | 187,132 (17.84%)                                | 0.02                          | <.0001                      | 0.01                         | 0.0090                     |
| Renal Failure                                            | 65,691 (32.21%)                              | 65,691 (32.21%)                                  | 64,045 (31.41%)                                   | 298,424 (28.45%)                                | 0.08                          | <.0001                      | 0.02                         | <.0001                     |
| COPD                                                     | 76,450 (37.49%)                              | 76,450 (37.49%)                                  | 76,115 (37.33%)                                   | 466,847 (44.50%)                                | -0.14                         | <.0001                      | 0.00                         | 0.2798                     |
| Pneumonia; pleural effusion/pneumothorax                 | 102,634 (50.33%)                             | 102,634 (50.33%)                                 | 104,244 (51.12%)                                  | 575,291 (54.84%)                                | -0.09                         | <.0001                      | -0.02                        | <.0001                     |
| Diabetes                                                 | 98,668 (48.39%)                              | 98,668 (48.39%)                                  | 97,158 (47.64%)                                   | 474,593 (45.24%)                                | 0.06                          | <.0001                      | 0.01                         | <.0001                     |
| Malnutrition                                             | 21,128 (10.36%)                              | 21,128 (10.36%)                                  | 20,357 (9.98%)                                    | 105,149 (10.02%)                                | 0.01                          | <.0001                      | 0.01                         | 0.0001                     |
| Dementia or other specified brain disorders              | 54,287 (26.62%)                              | 54,287 (26.62%)                                  | 52,758 (25.87%)                                   | 285,166 (27.18%)                                | -0.01                         | <.0001                      | 0.02                         | <.0001                     |
| Hemiplegia, paraplegia, paralysis, functional disability | 17,390 (8.53%)                               | 17,390 (8.53%)                                   | 17,069 (8.37%)                                    | 80,461 (7.67%)                                  | 0.03                          | <.0001                      | 0.01                         | 0.0716                     |
| Vascular disease and complications                       | 67,995 (33.34%)                              | 67,995 (33.34%)                                  | 67,888 (33.29%)                                   | 295,960 (28.21%)                                | 0.11                          | <.0001                      | 0.00                         | 0.7247                     |
| Cancer                                                   | 14,543 (7.13%)                               | 14,543 (7.13%)                                   | 13,104 (6.43%)                                    | 63,063 (6.01%)                                  | 0.05                          | <.0001                      | 0.03                         | <.0001                     |
| Trauma; other injuries                                   | 63,017 (30.90%)                              | 63,017 (30.90%)                                  | 62,762 (30.78%)                                   | 314,786 (30.01%)                                | 0.02                          | <.0001                      | 0.00                         | 0.3891                     |
| Major psychiatric disorders                              | 23,815 (11.68%)                              | 23,815 (11.68%)                                  | 22,039 (10.81%)                                   | 121,648 (11.60%)                                | 0.00                          | 0.2885                      | 0.03                         | <.0001                     |
| Chronic Liver Disease                                    | 5,963 (2.92%)                                | 5,963 (2.92%)                                    | 5,045 (2.47%)                                     | 21,178 (2.02%)                                  | 0.06                          | <.0001                      | 0.03                         | <.0001                     |
| Severe hematological disorders                           | 4,523 (2.22%)                                | 4,523 (2.22%)                                    | 3,341 (1.64%)                                     | 18,814 (1.79%)                                  | 0.03                          | <.0001                      | 0.04                         | <.0001                     |

| Variable                                                             | All Major Teaching Cases<br>N=203,922 | Matched Major Teaching Cases<br>N=203,922 | Matched Non-Teaching Controls<br>N=203,922 | All Non-Teaching Controls<br>N=1,049,037 | Std. Diff Before Match | P-value Before Match | Std. Diff After Match | P-value After Match |
|----------------------------------------------------------------------|---------------------------------------|-------------------------------------------|--------------------------------------------|------------------------------------------|------------------------|----------------------|-----------------------|---------------------|
| Iron deficiency or other/unspecified anemias and blood disease       | 116,714 (57.23%)                      | 116,714 (57.23%)                          | 117,655 (57.70%)                           | 562,529 (53.62%)                         | 0.07                   | <.0001               | -0.01                 | 0.0029              |
| Depression                                                           | 41,117 (20.16%)                       | 41,117 (20.16%)                           | 39,294 (19.27%)                            | 210,185 (20.04%)                         | 0.00                   | 0.1897               | 0.02                  | <.0001              |
| Parkinson's and Huntington's diseases                                | 6,903 (3.39%)                         | 6,903 (3.39%)                             | 6,815 (3.34%)                              | 36,755 (3.50%)                           | -0.01                  | 0.0075               | 0.00                  | 0.4499              |
| Seizure disorders and convulsions                                    | 10,903 (5.35%)                        | 10,903 (5.35%)                            | 9,405 (4.61%)                              | 48,552 (4.63%)                           | 0.03                   | <.0001               | 0.03                  | <.0001              |
| Fibrosis of lung or other chronic lung disorders                     | 17,667 (8.66%)                        | 17,667 (8.66%)                            | 16,924 (8.30%)                             | 103,140 (9.83%)                          | -0.04                  | <.0001               | 0.01                  | <.0001              |
| Asthma                                                               | 20,497 (10.05%)                       | 20,497 (10.05%)                           | 19,064 (9.35%)                             | 91,258 (8.70%)                           | 0.05                   | <.0001               | 0.02                  | <.0001              |
| <b>Predicted Risk</b>                                                |                                       |                                           |                                            |                                          |                        |                      |                       |                     |
| 30-Day Mortality Risk Quintile 1                                     | 41,851 (20.52%)                       | 41,851 (20.52%)                           | 41,851 (20.52%)                            | 208,675 (19.89%)                         | 0.02                   | <.0001               | 0.00                  | 1.0000              |
| 30-Day Mortality Risk Quintile 2                                     | 39,207 (19.23%)                       | 39,207 (19.23%)                           | 39,207 (19.23%)                            | 211,077 (20.12%)                         | -0.02                  | <.0001               | 0.00                  | 1.0000              |
| 30-Day Mortality Risk Quintile 3                                     | 39,738 (19.49%)                       | 39,738 (19.49%)                           | 39,738 (19.49%)                            | 211,207 (20.13%)                         | -0.02                  | <.0001               | 0.00                  | 1.0000              |
| 30-Day Mortality Risk Quintile 4                                     | 40,547 (19.88%)                       | 40,547 (19.88%)                           | 40,547 (19.88%)                            | 210,049 (20.02%)                         | 0.00                   | 0.1499               | 0.00                  | 1.0000              |
| 30-Day Mortality Risk Quintile 5                                     | 42,579 (20.88%)                       | 42,579 (20.88%)                           | 42,579 (20.88%)                            | 208,029 (19.83%)                         | 0.03                   | <.0001               | 0.00                  | 1.0000              |
| Mean 30-day mortality risk quintile                                  | 3.0                                   | 3.0                                       | 3.0                                        | 3.0                                      | 0.01                   | <.0001               | 0.00                  | 1.0000              |
| Mean ICU risk quintile                                               | 3.1                                   | 3.1                                       | 3.1                                        | 3.0                                      | 0.06                   | <.0001               | 0.01                  | 0.0079              |
| Mean LOS risk quintile                                               | 3.1                                   | 3.1                                       | 3.0                                        | 3.0                                      | 0.05                   | <.0001               | 0.02                  | <.0001              |
| Mean cost risk quintile                                              | 3.1                                   | 3.1                                       | 3.1                                        | 3.0                                      | 0.07                   | <.0001               | 0.02                  | <.0001              |
| Risk score for 30-Day Mortality (mean)                               | 12.1%                                 | 12.1%                                     | 12.0%                                      | 12.0%                                    | 0.01                   | 0.0064               | 0.00                  | 0.7169              |
| Predicted ICU Utilization (mean)                                     | 51.0%                                 | 51.0%                                     | 51.0%                                      | 49.7%                                    | 0.08                   | <.0001               | 0.00                  | 0.3615              |
| Predicted LOS (mean)                                                 | 4.6                                   | 4.6                                       | 4.6                                        | 4.5                                      | 0.03                   | <.0001               | 0.02                  | <.0001              |
| Predicted Cost (mean)                                                | 14,632                                | 14,632                                    | 14,575                                     | 14,316                                   | 0.08                   | <.0001               | 0.02                  | <.0001              |
| <b>Hospital Characteristics (Not Included in Matching Algorithm)</b> |                                       |                                           |                                            |                                          |                        |                      |                       |                     |
| Total Beds                                                           | 554.4                                 | 554.4                                     | 225.6                                      | 227.7                                    | 1.11                   | <.0001               | 1.11                  | <.0001              |
| Size Small ( $\leq 100$ beds)                                        | 2,397 (1.18%)                         | 2,397 (1.18%)                             | 44,395 (21.77%)                            | 275,521 (26.26%)                         | -0.78                  | <.0001               | -0.64                 | <.0001              |
| Size Medium ( $>100$ to $\leq 250$ beds)                             | 27,616 (13.54%)                       | 27,616 (13.54%)                           | 88,284 (43.29%)                            | 408,994 (38.99%)                         | -0.60                  | <.0001               | -0.71                 | <.0001              |
| Size Large ( $>250$ beds)                                            | 173,909 (85.28%)                      | 173,909 (85.28%)                          | 71,243 (34.94%)                            | 364,522 (34.75%)                         | 1.20                   | <.0001               | 1.20                  | <.0001              |
| COTH Member                                                          | 140,312 (68.81%)                      | 140,312 (68.81%)                          | --                                         | --                                       | --                     | --                   | --                    | --                  |
| RB Ratio (mean)                                                      | 0.50                                  | 0.50                                      | 0.00                                       | 0.00                                     | 2.95                   | <.0001               | 2.95                  | <.0001              |
| Very Major Teaching Hospital ( $0.60 \leq RB$ )                      | 58,574 (28.72%)                       | 58,574 (28.72%)                           | --                                         | --                                       | --                     | --                   | --                    | --                  |
| Major Teaching Hospital ( $0.25 < RB < 0.60$ )                       | 145,348 (71.28%)                      | 145,348 (71.28%)                          | --                                         | --                                       | --                     | --                   | --                    | --                  |
| Minor Teaching Hospital ( $0.05 < RB \leq 0.25$ )                    | --                                    | --                                        | --                                         | --                                       | --                     | --                   | --                    | --                  |
| Very Minor Teaching Hospital ( $0.0 < RB \leq 0.05$ )                | --                                    | --                                        | 40,919 (20.07%)                            | 187,060 (17.83%)                         | --                     | --                   | --                    | --                  |
| Nonteaching Hospital ( $RB = 0$ )                                    | --                                    | --                                        | 163,003 (79.93%)                           | 861,977 (82.17%)                         | --                     | --                   | --                    | --                  |
| NB Ratio (mean)                                                      | 1.67                                  | 1.67                                      | 1.46                                       | 1.39                                     | 0.09                   | <.0001               | 0.07                  | <.0001              |
| NB Ratio High ( $1.0 \leq NB$ )                                      | 174,602 (85.62%)                      | 174,602 (85.62%)                          | 145,219 (71.21%)                           | 723,498 (68.97%)                         | 0.41                   | <.0001               | 0.35                  | <.0001              |
| NB Ratio Moderate ( $0.5 \leq NB < 1.0$ )                            | 21,991 (10.78%)                       | 21,991 (10.78%)                           | 45,591 (22.36%)                            | 248,106 (23.65%)                         | -0.35                  | <.0001               | -0.31                 | <.0001              |
| NB Ratio Low ( $NB < 0.5$ )                                          | 7,324 (3.59%)                         | 7,324 (3.59%)                             | 11,841 (5.81%)                             | 71,676 (6.83%)                           | -0.15                  | <.0001               | -0.10                 | <.0001              |
| NB Ratio Missing                                                     | --                                    | --                                        | 1,271 (0.62%)                              | 5,757 (0.55%)                            | --                     | --                   | --                    | --                  |
| Nurse-Mix (mean)                                                     | 0.94                                  | 0.94                                      | 0.90                                       | 0.88                                     | 0.49                   | <.0001               | 0.36                  | <.0001              |

| <b>Variable</b>                     | <b>All Major Teaching Cases</b><br>N=203,922 | <b>Matched Major Teaching Cases</b><br>N=203,922 | <b>Matched Non-Teaching Controls</b><br>N=203,922 | <b>All Non-Teaching Controls</b><br>N=1,049,037 | <b>Std. Diff Before Match</b> | <b>P-value Before Match</b> | <b>Std. Diff After Match</b> | <b>P-value After Match</b> |
|-------------------------------------|----------------------------------------------|--------------------------------------------------|---------------------------------------------------|-------------------------------------------------|-------------------------------|-----------------------------|------------------------------|----------------------------|
| Nurse-Mix High (90 < % RN)          | 173,000 (84.84%)                             | 173,000 (84.84%)                                 | 127,837 (62.69%)                                  | 602,548 (57.44%)                                | 0.63                          | <.0001                      | 0.51                         | <.0001                     |
| Nurse-Mix Moderate (75 ≤ % RN ≤ 90) | 24,385 (11.96%)                              | 24,385 (11.96%)                                  | 56,314 (27.62%)                                   | 307,730 (29.33%)                                | -0.44                         | <.0001                      | -0.40                        | <.0001                     |
| Nurse-Mix Low (% RN < 75)           | 5,264 (2.58%)                                | 5,264 (2.58%)                                    | 17,114 (8.39%)                                    | 127,525 (12.16%)                                | -0.37                         | <.0001                      | -0.23                        | <.0001                     |
| Nurse-Mix Missing                   | 1,273 (0.62%)                                | 1,273 (0.62%)                                    | 2,657 (1.30%)                                     | 11,234 (1.07%)                                  | -0.05                         | <.0001                      | -0.07                        | <.0001                     |
| High Technology Hospital            | 119,499 (58.60%)                             | 119,499 (58.60%)                                 | 40,683 (20.08%)                                   | 227,062 (21.76%)                                | 0.81                          | <.0001                      | 0.85                         | <.0001                     |
| Dual-Eligible                       | 45,631 (22.38%)                              | 45,631 (22.38%)                                  | 41,024 (20.12%)                                   | 212,933 (20.30%)                                | 0.05                          | <.0001                      | 0.06                         | <.0001                     |

“--” indicates a blank cell.



**Appendix Table 9a. Complete Matching Table for AMI** The table below reports balance before and after matching between patients admitted to major teaching or non-teaching hospitals for AMI. All covariates met balance criteria.

| <b>Variable</b>                        | <b>All Major Teaching Cases</b><br>N=43,990 | <b>Matched Major Teaching Cases</b><br>N=43,990 | <b>Matched Non-Teaching Controls</b><br>N=43,990 | <b>All Non-Teaching Controls</b><br>N=237,122 | <b>Std. Diff Before Match</b> | <b>P-value Before Match</b> | <b>Std. Diff After Match</b> | <b>P-value After Match</b> |
|----------------------------------------|---------------------------------------------|-------------------------------------------------|--------------------------------------------------|-----------------------------------------------|-------------------------------|-----------------------------|------------------------------|----------------------------|
| Number of Hospitals                    | 335                                         | 335                                             | 2,188                                            | 2,424                                         |                               |                             |                              |                            |
| <b>Demographics</b>                    |                                             |                                                 |                                                  |                                               |                               |                             |                              |                            |
| Sex (% male)                           | 22,785 (51.80%)                             | 22,785 (51.80%)                                 | 22,785 (51.80%)                                  | 125,807 (53.06%)                              | -0.03                         | <.0001                      | 0.00                         | 1.0000                     |
| Age (mean)                             | 78.5                                        | 78.5                                            | 78.6                                             | 78.1                                          | 0.04                          | <.0001                      | -0.02                        | 0.0040                     |
| Age 65-69                              | 8,141 (18.51%)                              | 8,141 (18.51%)                                  | 7,930 (18.03%)                                   | 44,049 (18.58%)                               | 0.00                          | 0.7335                      | 0.01                         | 0.0669                     |
| Age 70-74                              | 8,437 (19.18%)                              | 8,437 (19.18%)                                  | 8,217 (18.68%)                                   | 47,308 (19.95%)                               | -0.02                         | 0.0002                      | 0.01                         | 0.0595                     |
| Age 75-79                              | 7,862 (17.87%)                              | 7,862 (17.87%)                                  | 7,814 (17.76%)                                   | 44,559 (18.79%)                               | -0.02                         | <.0001                      | 0.00                         | 0.6788                     |
| Age 80-84                              | 7,505 (17.06%)                              | 7,505 (17.06%)                                  | 7,721 (17.55%)                                   | 41,888 (17.67%)                               | -0.02                         | 0.0022                      | -0.01                        | 0.0554                     |
| Age 85+                                | 12,045 (27.38%)                             | 12,045 (27.38%)                                 | 12,308 (27.98%)                                  | 59,318 (25.02%)                               | 0.05                          | <.0001                      | -0.01                        | 0.0484                     |
| Year (mean)                            | 2013.1                                      | 2013.1                                          | 2013.1                                           | 2013.1                                        | -0.00                         | 0.3755                      | -0.00                        | 0.8608                     |
| Year 2012                              | 10,169 (23.12%)                             | 10,169 (23.12%)                                 | 9,889 (22.48%)                                   | 54,566 (23.01%)                               | 0.00                          | 0.6306                      | 0.02                         | 0.0250                     |
| Year 2013                              | 18,271 (41.53%)                             | 18,271 (41.53%)                                 | 18,750 (42.62%)                                  | 98,180 (41.40%)                               | 0.00                          | 0.6130                      | -0.02                        | 0.0011                     |
| Year 2014                              | 15,550 (35.35%)                             | 15,550 (35.35%)                                 | 15,351 (34.90%)                                  | 84,376 (35.58%)                               | 0.00                          | 0.3482                      | 0.01                         | 0.1620                     |
| Race- non-Hispanic White               | 32,466 (73.80%)                             | 32,466 (73.80%)                                 | 33,385 (75.89%)                                  | 205,326 (86.59%)                              | -0.33                         | <.0001                      | -0.05                        | <.0001                     |
| Race- Black                            | 7,021 (15.96%)                              | 7,021 (15.96%)                                  | 6,387 (14.52%)                                   | 13,928 (5.87%)                                | 0.33                          | <.0001                      | 0.05                         | <.0001                     |
| Race- Hispanic                         | 2,713 (6.17%)                               | 2,713 (6.17%)                                   | 2,272 (5.16%)                                    | 10,870 (4.58%)                                | 0.07                          | <.0001                      | 0.04                         | <.0001                     |
| Race- Other                            | 1,790 (4.07%)                               | 1,790 (4.07%)                                   | 1,946 (4.42%)                                    | 6,998 (2.95%)                                 | 0.06                          | <.0001                      | -0.02                        | 0.0095                     |
| Emergent type admission                | 39,298 (89.33%)                             | 39,298 (89.33%)                                 | 39,021 (88.70%)                                  | 167,439 (70.61%)                              | 0.48                          | <.0001                      | 0.02                         | 0.0029                     |
| Treatment at another hospital's ED     | 121 (0.28%)                                 | 121 (0.28%)                                     | 130 (0.30%)                                      | 722 (0.30%)                                   | -0.01                         | 0.3188                      | 0.00                         | 0.6132                     |
| Prior care at SNF                      | 114 (0.26%)                                 | 114 (0.26%)                                     | 150 (0.34%)                                      | 585 (0.25%)                                   | 0.00                          | 0.6389                      | -0.02                        | 0.0308                     |
| Prior care at ASC                      | 53 (0.12%)                                  | 53 (0.12%)                                      | 58 (0.13%)                                       | 4,167 (1.76%)                                 | -0.17                         | <.0001                      | 0.00                         | 0.7042                     |
| Prior intermediate care facility visit | 84 (0.19%)                                  | 84 (0.19%)                                      | 80 (0.18%)                                       | 4,351 (1.83%)                                 | -0.16                         | <.0001                      | 0.00                         | 0.8147                     |
| Prior dialysis visit                   | 233 (0.53%)                                 | 233 (0.53%)                                     | 218 (0.50%)                                      | 1,694 (0.71%)                                 | -0.02                         | <.0001                      | 0.00                         | 0.5087                     |
| Region Northeast                       | 20,665 (46.98%)                             | 20,665 (46.98%)                                 | 20,490 (46.58%)                                  | 48,276 (20.36%)                               | 0.59                          | <.0001                      | 0.01                         | 0.2397                     |
| Region Midwest                         | 13,691 (31.12%)                             | 13,691 (31.12%)                                 | 13,312 (30.26%)                                  | 55,740 (23.51%)                               | 0.17                          | <.0001                      | 0.02                         | 0.0057                     |
| Region Pacific                         | 2,476 (5.63%)                               | 2,476 (5.63%)                                   | 2,970 (6.75%)                                    | 27,103 (11.43%)                               | -0.21                         | <.0001                      | -0.04                        | <.0001                     |
| Region South                           | 6,262 (14.24%)                              | 6,262 (14.24%)                                  | 6,331 (14.39%)                                   | 92,028 (38.81%)                               | -0.58                         | <.0001                      | 0.00                         | 0.5127                     |
| Region Rockies                         | 896 (2.04%)                                 | 896 (2.04%)                                     | 887 (2.02%)                                      | 13,975 (5.89%)                                | -0.20                         | <.0001                      | 0.00                         | 0.8482                     |
| <b>Admission Conditions</b>            |                                             |                                                 |                                                  |                                               |                               |                             |                              |                            |
| STEMI Type 1                           | 3,557 (8.09%)                               | 3,557 (8.09%)                                   | 3,557 (8.09%)                                    | 18,771 (7.92%)                                | 0.01                          | 0.2265                      | 0.00                         | 1.0000                     |
| STEMI Type 2                           | 5,576 (12.68%)                              | 5,576 (12.68%)                                  | 5,576 (12.68%)                                   | 28,931 (12.20%)                               | 0.01                          | 0.0055                      | 0.00                         | 1.0000                     |
| NSTEMI or unspecified MI               | 34,857 (79.24%)                             | 34,857 (79.24%)                                 | 34,857 (79.24%)                                  | 189,420 (79.88%)                              | -0.02                         | 0.0021                      | 0.00                         | 1.0000                     |
| <b>Comorbidities</b>                   |                                             |                                                 |                                                  |                                               |                               |                             |                              |                            |
| History of PTCA                        | 3,600 (8.18%)                               | 3,600 (8.18%)                                   | 3,903 (8.87%)                                    | 18,318 (7.73%)                                | 0.02                          | 0.0011                      | -0.03                        | 0.0003                     |
| History of CABG                        | 3,435 (7.81%)                               | 3,435 (7.81%)                                   | 3,863 (8.78%)                                    | 19,176 (8.09%)                                | -0.01                         | 0.0493                      | -0.04                        | <.0001                     |
| Heart Failure                          | 10,617 (24.14%)                             | 10,617 (24.14%)                                 | 10,492 (23.85%)                                  | 53,887 (22.73%)                               | 0.03                          | <.0001                      | 0.01                         | 0.3276                     |
| Myocardial Infarction                  | 4,961 (11.28%)                              | 4,961 (11.28%)                                  | 4,832 (10.98%)                                   | 34,786 (14.67%)                               | -0.10                         | <.0001                      | 0.01                         | 0.1700                     |

| <b>Variable</b>                                                | <b>All Major Teaching Cases</b><br>N=43,990 | <b>Matched Major Teaching Cases</b><br>N=43,990 | <b>Matched Non-Teaching Controls</b><br>N=43,990 | <b>All Non-Teaching Controls</b><br>N=237,122 | <b>Std. Diff Before Match</b> | <b>P-value Before Match</b> | <b>Std. Diff After Match</b> | <b>P-value After Match</b> |
|----------------------------------------------------------------|---------------------------------------------|-------------------------------------------------|--------------------------------------------------|-----------------------------------------------|-------------------------------|-----------------------------|------------------------------|----------------------------|
| Unstable Angina                                                | 6,037 (13.72%)                              | 6,037 (13.72%)                                  | 5,848 (13.29%)                                   | 32,387 (13.66%)                               | 0.00                          | 0.7168                      | 0.01                         | 0.0637                     |
| Cardio-respiratory Failure or Shock                            | 3,075 (6.99%)                               | 3,075 (6.99%)                                   | 2,856 (6.49%)                                    | 18,545 (7.82%)                                | -0.03                         | <.0001                      | 0.02                         | 0.0034                     |
| Valvular Heart Disease                                         | 13,884 (31.56%)                             | 13,884 (31.56%)                                 | 14,277 (32.46%)                                  | 76,142 (32.11%)                               | -0.01                         | 0.0236                      | -0.02                        | 0.0046                     |
| Hypertension                                                   | 39,519 (89.84%)                             | 39,519 (89.84%)                                 | 39,149 (89.00%)                                  | 211,732 (89.29%)                              | 0.02                          | 0.0006                      | 0.03                         | 0.0001                     |
| Stroke                                                         | 3,030 (6.89%)                               | 3,030 (6.89%)                                   | 2,854 (6.49%)                                    | 13,362 (5.64%)                                | 0.05                          | <.0001                      | 0.02                         | 0.0182                     |
| Cerebrovascular Disease                                        | 7,298 (16.59%)                              | 7,298 (16.59%)                                  | 6,911 (15.71%)                                   | 36,052 (15.20%)                               | 0.04                          | <.0001                      | 0.02                         | 0.0004                     |
| Renal Failure                                                  | 9,980 (22.69%)                              | 9,980 (22.69%)                                  | 9,462 (21.51%)                                   | 48,139 (20.30%)                               | 0.06                          | <.0001                      | 0.03                         | <.0001                     |
| COPD                                                           | 10,546 (23.97%)                             | 10,546 (23.97%)                                 | 10,232 (23.26%)                                  | 68,310 (28.81%)                               | -0.11                         | <.0001                      | 0.02                         | 0.0130                     |
| Pneumonia; pleural effusion/pneumothorax                       | 9,137 (20.77%)                              | 9,137 (20.77%)                                  | 9,089 (20.66%)                                   | 48,527 (20.46%)                               | 0.01                          | 0.1463                      | 0.00                         | 0.6958                     |
| Diabetes                                                       | 21,150 (48.08%)                             | 21,150 (48.08%)                                 | 20,916 (47.55%)                                  | 105,927 (44.67%)                              | 0.07                          | <.0001                      | 0.01                         | 0.1158                     |
| Malnutrition                                                   | 2,551 (5.80%)                               | 2,551 (5.80%)                                   | 2,304 (5.24%)                                    | 11,864 (5.00%)                                | 0.04                          | <.0001                      | 0.02                         | 0.0003                     |
| Dementia or other specified brain disorders                    | 8,471 (19.26%)                              | 8,471 (19.26%)                                  | 8,200 (18.64%)                                   | 42,960 (18.12%)                               | 0.03                          | <.0001                      | 0.02                         | 0.0202                     |
| Hemiplegia, paraplegia, paralysis, functional disability       | 2,573 (5.85%)                               | 2,573 (5.85%)                                   | 2,346 (5.33%)                                    | 11,581 (4.88%)                                | 0.04                          | <.0001                      | 0.02                         | 0.0009                     |
| Vascular disease and complications                             | 11,585 (26.34%)                             | 11,585 (26.34%)                                 | 11,682 (26.56%)                                  | 51,162 (21.58%)                               | 0.11                          | <.0001                      | -0.01                        | 0.4631                     |
| Cancer                                                         | 1,832 (4.16%)                               | 1,832 (4.16%)                                   | 1,459 (3.32%)                                    | 7,970 (3.36%)                                 | 0.04                          | <.0001                      | 0.04                         | <.0001                     |
| Trauma; other injuries                                         | 11,324 (25.74%)                             | 11,324 (25.74%)                                 | 11,041 (25.10%)                                  | 55,953 (23.60%)                               | 0.05                          | <.0001                      | 0.01                         | 0.0290                     |
| Major psychiatric disorders                                    | 3,474 (7.90%)                               | 3,474 (7.90%)                                   | 3,610 (8.21%)                                    | 17,269 (7.28%)                                | 0.02                          | <.0001                      | -0.01                        | 0.0944                     |
| Chronic Liver Disease                                          | 828 (1.88%)                                 | 828 (1.88%)                                     | 865 (1.97%)                                      | 2,970 (1.25%)                                 | 0.05                          | <.0001                      | -0.01                        | 0.3770                     |
| Severe hematological disorders                                 | 555 (1.26%)                                 | 555 (1.26%)                                     | 477 (1.08%)                                      | 2,422 (1.02%)                                 | 0.02                          | <.0001                      | 0.02                         | 0.0159                     |
| Iron deficiency or other/unspecified anemias and blood disease | 20,822 (47.33%)                             | 20,822 (47.33%)                                 | 20,645 (46.93%)                                  | 100,623 (42.44%)                              | 0.10                          | <.0001                      | 0.01                         | 0.2346                     |
| Depression                                                     | 6,288 (14.29%)                              | 6,288 (14.29%)                                  | 6,547 (14.88%)                                   | 33,510 (14.13%)                               | 0.00                          | 0.3716                      | -0.02                        | 0.0137                     |
| Parkinson's and Huntington's diseases                          | 955 (2.17%)                                 | 955 (2.17%)                                     | 1,096 (2.49%)                                    | 4,976 (2.10%)                                 | 0.01                          | 0.3294                      | -0.02                        | 0.0018                     |
| Seizure disorders and convulsions                              | 1,785 (4.06%)                               | 1,785 (4.06%)                                   | 1,785 (4.06%)                                    | 7,902 (3.33%)                                 | 0.04                          | <.0001                      | 0.00                         | 1.0000                     |
| Fibrosis of lung or other chronic lung disorders               | 1,872 (4.26%)                               | 1,872 (4.26%)                                   | 1,710 (3.89%)                                    | 11,640 (4.91%)                                | -0.03                         | <.0001                      | 0.02                         | 0.0060                     |
| Asthma                                                         | 3,193 (7.26%)                               | 3,193 (7.26%)                                   | 2,905 (6.60%)                                    | 13,848 (5.84%)                                | 0.06                          | <.0001                      | 0.03                         | 0.0001                     |
| <b>Predicted Risk</b>                                          |                                             |                                                 |                                                  |                                               |                               |                             |                              |                            |
| 30-Day Mortality Risk Quintile 1                               | 7,908 (17.98%)                              | 7,908 (17.98%)                                  | 7,908 (17.98%)                                   | 48,257 (20.35%)                               | -0.06                         | <.0001                      | 0.00                         | 1.0000                     |
| 30-Day Mortality Risk Quintile 2                               | 8,516 (19.36%)                              | 8,516 (19.36%)                                  | 8,516 (19.36%)                                   | 47,762 (20.14%)                               | -0.02                         | 0.0002                      | 0.00                         | 1.0000                     |
| 30-Day Mortality Risk Quintile 3                               | 8,650 (19.66%)                              | 8,650 (19.66%)                                  | 8,650 (19.66%)                                   | 47,574 (20.06%)                               | -0.01                         | 0.0548                      | 0.00                         | 1.0000                     |
| 30-Day Mortality Risk Quintile 4                               | 9,273 (21.08%)                              | 9,273 (21.08%)                                  | 9,273 (21.08%)                                   | 46,944 (19.80%)                               | 0.03                          | <.0001                      | 0.00                         | 1.0000                     |
| 30-Day Mortality Risk Quintile 5                               | 9,643 (21.92%)                              | 9,643 (21.92%)                                  | 9,643 (21.92%)                                   | 46,585 (19.65%)                               | 0.06                          | <.0001                      | 0.00                         | 1.0000                     |
| Mean 30-day mortality risk quintile                            | 3.1                                         | 3.1                                             | 3.1                                              | 3.0                                           | 0.08                          | <.0001                      | 0.00                         | 1.0000                     |
| Mean ICU risk quintile                                         | 3.0                                         | 3.0                                             | 3.0                                              | 3.0                                           | -0.01                         | 0.0090                      | 0.00                         | 0.7799                     |
| Mean LOS risk quintile                                         | 3.1                                         | 3.1                                             | 3.0                                              | 3.0                                           | 0.06                          | <.0001                      | 0.02                         | 0.0107                     |
| Mean cost risk quintile                                        | 3.1                                         | 3.1                                             | 3.0                                              | 3.0                                           | 0.05                          | <.0001                      | 0.01                         | 0.0465                     |
| Risk score for 30-Day Mortality (mean)                         | 12.8%                                       | 12.8%                                           | 12.7%                                            | 12.0%                                         | 0.07                          | <.0001                      | 0.00                         | 0.8320                     |
| Predicted ICU Utilization (mean)                               | 75.1%                                       | 75.1%                                           | 75.1%                                            | 75.3%                                         | -0.01                         | 0.0015                      | 0.00                         | 0.6454                     |
| Predicted LOS (mean)                                           | 4.1                                         | 4.1                                             | 4.1                                              | 4.1                                           | 0.06                          | <.0001                      | 0.02                         | 0.0069                     |

| Variable                                                             | All Major Teaching Cases<br>N=43,990 | Matched Major Teaching Cases<br>N=43,990 | Matched Non-Teaching Controls<br>N=43,990 | All Non-Teaching Controls<br>N=237,122 | Std. Diff Before Match | P-value Before Match | Std. Diff After Match | P-value After Match |  |
|----------------------------------------------------------------------|--------------------------------------|------------------------------------------|-------------------------------------------|----------------------------------------|------------------------|----------------------|-----------------------|---------------------|--|
| Predicted Cost (mean)                                                | \$17,817                             | \$17,817                                 | \$17,750                                  | \$17,590                               | 0.05                   | <.0001               | 0.02                  | 0.0360              |  |
| <b>Hospital Characteristics (Not Included in Matching Algorithm)</b> |                                      |                                          |                                           |                                        |                        |                      |                       |                     |  |
| Total Beds                                                           | 538.1                                | 538.1                                    | 228.4                                     | 219.5                                  | 1.11                   | <.0001               | 1.08                  | <.0001              |  |
| Size Small ( $\leq 100$ beds)                                        | 529 (1.20%)                          | 529 (1.20%)                              | 9,588 (21.80%)                            | 70,036 (29.54%)                        | -0.85                  | <.0001               | -0.62                 | <.0001              |  |
| Size Medium ( $>100$ to $\leq 250$ beds)                             | 6,082 (13.83%)                       | 6,082 (13.83%)                           | 18,544 (42.16%)                           | 87,919 (37.08%)                        | -0.55                  | <.0001               | -0.67                 | <.0001              |  |
| Size Large ( $>250$ beds)                                            | 37,379 (84.97%)                      | 37,379 (84.97%)                          | 15,858 (36.05%)                           | 79,167 (33.39%)                        | 1.23                   | <.0001               | 1.17                  | <.0001              |  |
| COTH Member                                                          | 29,685 (67.48%)                      | 29,685 (67.48%)                          | --                                        | --                                     | --                     | --                   | --                    | --                  |  |
| RB Ratio (mean)                                                      | 0.50                                 | 0.50                                     | 0.00                                      | 0.00                                   | 2.97                   | <.0001               | 2.96                  | <.0001              |  |
| Very Major Teaching Hospital ( $0.60 \leq RB$ )                      | 12,534 (28.49%)                      | 12,534 (28.49%)                          | --                                        | --                                     | --                     | --                   | --                    | --                  |  |
| Major Teaching Hospital ( $0.25 < RB < 0.60$ )                       | 31,456 (71.51%)                      | 31,456 (71.51%)                          | --                                        | --                                     | --                     | --                   | --                    | --                  |  |
| Minor Teaching Hospital ( $0.05 < RB \leq 0.25$ )                    | --                                   | --                                       | --                                        | --                                     | --                     | --                   | --                    | --                  |  |
| Very Minor Teaching Hospital ( $0.0 < RB \leq 0.05$ )                | --                                   | --                                       | 8,805 (20.02%)                            | 40,400 (17.04%)                        | --                     | --                   | --                    | --                  |  |
| Nonteaching Hospital ( $RB = 0$ )                                    | --                                   | --                                       | 35,185 (79.98%)                           | 196,722 (82.96%)                       | --                     | --                   | --                    | --                  |  |
| NB Ratio (mean)                                                      | 1.67                                 | 1.67                                     | 1.51                                      | 1.44                                   | 0.07                   | <.0001               | 0.05                  | <.0001              |  |
| NB Ratio High ( $1.0 \leq NB$ )                                      | 37,535 (85.33%)                      | 37,535 (85.33%)                          | 31,579 (71.79%)                           | 164,813 (69.51%)                       | 0.39                   | <.0001               | 0.33                  | <.0001              |  |
| NB Ratio Moderate ( $0.5 \leq NB < 1.0$ )                            | 4,746 (10.79%)                       | 4,746 (10.79%)                           | 9,748 (22.16%)                            | 55,159 (23.26%)                        | -0.34                  | <.0001               | -0.31                 | <.0001              |  |
| NB Ratio Low ( $NB < 0.5$ )                                          | 1,709 (3.88%)                        | 1,709 (3.88%)                            | 2,499 (5.68%)                             | 16,339 (6.89%)                         | -0.13                  | <.0001               | -0.08                 | <.0001              |  |
| NB Ratio Missing                                                     | --                                   | --                                       | 164 (0.37%)                               | 811 (0.34%)                            | --                     | --                   | --                    | --                  |  |
| Nurse-Mix (mean)                                                     | 0.94                                 | 0.94                                     | 0.90                                      | 0.88                                   | 0.50                   | <.0001               | 0.37                  | <.0001              |  |
| Nurse-Mix High ( $90 < \% RN$ )                                      | 36,649 (83.31%)                      | 36,649 (83.31%)                          | 27,198 (61.83%)                           | 134,712 (56.81%)                       | 0.60                   | <.0001               | 0.49                  | <.0001              |  |
| Nurse-Mix Moderate ( $75 \leq \% RN \leq 90$ )                       | 5,883 (13.37%)                       | 5,883 (13.37%)                           | 12,482 (28.37%)                           | 70,391 (29.69%)                        | -0.40                  | <.0001               | -0.37                 | <.0001              |  |
| Nurse-Mix Low ( $\% RN < 75$ )                                       | 1,091 (2.48%)                        | 1,091 (2.48%)                            | 3,869 (8.80%)                             | 30,022 (12.66%)                        | -0.39                  | <.0001               | -0.24                 | <.0001              |  |
| Nurse-Mix Missing                                                    | 367 (0.83%)                          | 367 (0.83%)                              | 441 (1.00%)                               | 1,997 (0.84%)                          | 0.00                   | 0.8870               | -0.02                 | 0.0098              |  |
| High Technology Hospital                                             | 25,820 (58.70%)                      | 25,820 (58.70%)                          | 9,131 (20.83%)                            | 49,883 (21.11%)                        | 0.83                   | <.0001               | 0.84                  | <.0001              |  |
| Dual-Eligible                                                        | 9,018 (20.50%)                       | 9,018 (20.50%)                           | 7,537 (17.13%)                            | 39,345 (16.59%)                        | 0.10                   | <.0001               | 0.09                  | <.0001              |  |
| Patient received PCI                                                 | 16,888 (38.39%)                      | 16,888 (38.39%)                          | 14,646 (33.29%)                           | 88,204 (37.20%)                        | 0.02                   | <.0001               | 0.11                  | <.0001              |  |
| Patient received CABG                                                | 2,860 (6.50%)                        | 2,860 (6.50%)                            | 2,137 (4.86%)                             | 14,869 (6.27%)                         | 0.01                   | 0.0679               | 0.07                  | <.0001              |  |

"--" indicates a blank cell.

**Appendix Table 9b. Complete Matching Table for HF** The table below reports balance before and after matching between patients admitted to major teaching or non-teaching hospitals for congestive heart failure. All covariates met balance criteria.

| <b>Variable</b>                        | <b>All Major Teaching Cases</b><br>N=84,985 | <b>Matched Major Teaching Cases</b><br>N=84,985 | <b>Matched Non-Teaching Controls</b><br>N=84,985 | <b>All Non-Teaching Controls</b><br>N=358,729 | <b>Std. Diff Before Match</b> | <b>P-value Before Match</b> | <b>Std. Diff After Match</b> | <b>P-value After Match</b> |
|----------------------------------------|---------------------------------------------|-------------------------------------------------|--------------------------------------------------|-----------------------------------------------|-------------------------------|-----------------------------|------------------------------|----------------------------|
| Number of Hospitals                    | 338                                         | 338                                             | 2,346                                            | 2,466                                         |                               |                             |                              |                            |
| <b>Demographics</b>                    |                                             |                                                 |                                                  |                                               |                               |                             |                              |                            |
| Sex (% male)                           | 39,399 (46.36%)                             | 39,399 (46.36%)                                 | 39,850 (46.89%)                                  | 162,005 (45.16%)                              | 0.02                          | <.0001                      | -0.01                        | 0.0287                     |
| Age (mean)                             | 80.4                                        | 80.4                                            | 80.5                                             | 81.0                                          | -0.07                         | <.0001                      | -0.01                        | 0.0215                     |
| Age 65-69                              | 11,598 (13.65%)                             | 11,598 (13.65%)                                 | 11,466 (13.49%)                                  | 40,040 (11.16%)                               | 0.08                          | <.0001                      | 0.00                         | 0.3535                     |
| Age 70-74                              | 12,952 (15.24%)                             | 12,952 (15.24%)                                 | 12,903 (15.18%)                                  | 51,351 (14.31%)                               | 0.03                          | <.0001                      | 0.00                         | 0.7458                     |
| Age 75-79                              | 14,096 (16.59%)                             | 14,096 (16.59%)                                 | 13,893 (16.35%)                                  | 60,490 (16.86%)                               | -0.01                         | 0.0532                      | 0.01                         | 0.1865                     |
| Age 80-84                              | 16,032 (18.86%)                             | 16,032 (18.86%)                                 | 15,891 (18.70%)                                  | 72,618 (20.24%)                               | -0.03                         | <.0001                      | 0.00                         | 0.3846                     |
| Age 85+                                | 30,307 (35.66%)                             | 30,307 (35.66%)                                 | 30,832 (36.28%)                                  | 134,230 (37.42%)                              | -0.04                         | <.0001                      | -0.01                        | 0.0081                     |
| Year (mean)                            | 2013.1                                      | 2013.1                                          | 2013.1                                           | 2013.1                                        | -0.01                         | 0.0002                      | 0.00                         | 0.6629                     |
| Year 2012                              | 22,468 (26.44%)                             | 22,468 (26.44%)                                 | 22,264 (26.20%)                                  | 92,450 (25.77%)                               | 0.02                          | 0.0001                      | 0.01                         | 0.2635                     |
| Year 2013                              | 34,875 (41.04%)                             | 34,875 (41.04%)                                 | 35,134 (41.34%)                                  | 148,106 (41.29%)                              | -0.01                         | 0.1838                      | -0.01                        | 0.2036                     |
| Year 2014                              | 27,642 (32.53%)                             | 27,642 (32.53%)                                 | 27,587 (32.46%)                                  | 118,173 (32.94%)                              | -0.01                         | 0.0202                      | 0.00                         | 0.7797                     |
| Race- non-Hispanic White               | 59,811 (70.38%)                             | 59,811 (70.38%)                                 | 62,896 (74.01%)                                  | 299,484 (83.48%)                              | -0.31                         | <.0001                      | -0.09                        | <.0001                     |
| Race- Black                            | 17,733 (20.87%)                             | 17,733 (20.87%)                                 | 15,416 (18.14%)                                  | 32,407 (9.03%)                                | 0.34                          | <.0001                      | 0.08                         | <.0001                     |
| Race- Hispanic                         | 4,642 (5.46%)                               | 4,642 (5.46%)                                   | 3,884 (4.57%)                                    | 17,495 (4.88%)                                | 0.03                          | <.0001                      | 0.04                         | <.0001                     |
| Race- Other                            | 2,799 (3.29%)                               | 2,799 (3.29%)                                   | 2,789 (3.28%)                                    | 9,343 (2.60%)                                 | 0.04                          | <.0001                      | 0.00                         | 0.9026                     |
| Emergent type admission                | 71,794 (84.48%)                             | 71,794 (84.48%)                                 | 71,078 (83.64%)                                  | 271,355 (75.64%)                              | 0.22                          | <.0001                      | 0.02                         | <.0001                     |
| Treatment at another hospital's ED     | 16 (0.02%)                                  | 16 (0.02%)                                      | --                                               | 66 (0.02%)                                    | 0.00                          | 0.8889                      | --                           | --                         |
| Prior care at SNF                      | 282 (0.33%)                                 | 282 (0.33%)                                     | 309 (0.36%)                                      | 1,632 (0.45%)                                 | -0.02                         | <.0001                      | -0.01                        | 0.2840                     |
| Prior care at ASC                      | 98 (0.12%)                                  | 98 (0.12%)                                      | 93 (0.11%)                                       | 2,460 (0.69%)                                 | -0.09                         | <.0001                      | 0.00                         | 0.7722                     |
| Prior intermediate care facility visit | 175 (0.21%)                                 | 175 (0.21%)                                     | 144 (0.17%)                                      | 2,804 (0.78%)                                 | -0.08                         | <.0001                      | 0.01                         | 0.0926                     |
| Prior dialysis visit                   | 470 (0.55%)                                 | 470 (0.55%)                                     | 438 (0.52%)                                      | 2,558 (0.71%)                                 | -0.02                         | <.0001                      | 0.00                         | 0.3023                     |
| Region Northeast                       | 41,855 (49.25%)                             | 41,855 (49.25%)                                 | 41,592 (48.94%)                                  | 76,664 (21.37%)                               | 0.61                          | <.0001                      | 0.01                         | 0.2037                     |
| Region Midwest                         | 26,408 (31.07%)                             | 26,408 (31.07%)                                 | 25,621 (30.15%)                                  | 79,997 (22.30%)                               | 0.20                          | <.0001                      | 0.02                         | <.0001                     |
| Region Pacific                         | 4,379 (5.15%)                               | 4,379 (5.15%)                                   | 4,628 (5.45%)                                    | 39,859 (11.11%)                               | -0.22                         | <.0001                      | -0.01                        | 0.0072                     |
| Region South                           | 10,985 (12.93%)                             | 10,985 (12.93%)                                 | 11,782 (13.86%)                                  | 146,480 (40.83%)                              | -0.66                         | <.0001                      | -0.02                        | <.0001                     |
| Region Rockies                         | 1,358 (1.60%)                               | 1,358 (1.60%)                                   | 1,362 (1.60%)                                    | 15,729 (4.38%)                                | -0.16                         | <.0001                      | 0.00                         | 0.9538                     |
| <b>Admission Conditions</b>            |                                             |                                                 |                                                  |                                               |                               |                             |                              |                            |
| HF with Chronic Kidney Disease         | 5,773 (6.79%)                               | 5,773 (6.79%)                                   | 5,773 (6.79%)                                    | 17,169 (4.79%)                                | 0.09                          | <.0001                      | 0.00                         | 1.0000                     |
| HF with Hypertension                   | 2,270 (2.67%)                               | 2,270 (2.67%)                                   | 2,270 (2.67%)                                    | 9,111 (2.54%)                                 | 0.01                          | 0.0299                      | 0.00                         | 1.0000                     |
| HF, Other                              | 76,942 (90.54%)                             | 76,942 (90.54%)                                 | 76,942 (90.54%)                                  | 332,449 (92.67%)                              | -0.08                         | <.0001                      | 0.00                         | 1.0000                     |
| <b>Comorbidities</b>                   |                                             |                                                 |                                                  |                                               |                               |                             |                              |                            |
| History of PTCA                        | 7,616 (8.96%)                               | 7,616 (8.96%)                                   | 7,815 (9.20%)                                    | 30,206 (8.42%)                                | 0.02                          | <.0001                      | -0.01                        | 0.0946                     |
| History of CABG                        | 10,510 (12.37%)                             | 10,510 (12.37%)                                 | 10,914 (12.84%)                                  | 45,381 (12.65%)                               | -0.01                         | 0.0250                      | -0.01                        | 0.0032                     |
| Heart Failure                          | 56,423 (66.39%)                             | 56,423 (66.39%)                                 | 56,157 (66.08%)                                  | 224,521 (62.59%)                              | 0.08                          | <.0001                      | 0.01                         | 0.1741                     |
| Myocardial Infarction                  | 2,852 (3.36%)                               | 2,852 (3.36%)                                   | 2,670 (3.14%)                                    | 10,614 (2.96%)                                | 0.02                          | <.0001                      | 0.01                         | 0.0133                     |
| Unstable Angina                        | 7,075 (8.32%)                               | 7,075 (8.32%)                                   | 6,658 (7.83%)                                    | 22,432 (6.25%)                                | 0.08                          | <.0001                      | 0.02                         | 0.0002                     |

| <b>Variable</b>                                                | <b>All Major Teaching Cases</b><br>N=84,985 | <b>Matched Major Teaching Cases</b><br>N=84,985 | <b>Matched Non-Teaching Controls</b><br>N=84,985 | <b>All Non-Teaching Controls</b><br>N=358,729 | <b>Std. Diff Before Match</b> | <b>P-value Before Match</b> | <b>Std. Diff After Match</b> | <b>P-value After Match</b> |
|----------------------------------------------------------------|---------------------------------------------|-------------------------------------------------|--------------------------------------------------|-----------------------------------------------|-------------------------------|-----------------------------|------------------------------|----------------------------|
| Cardio-respiratory Failure or Shock                            | 15,141 (17.82%)                             | 15,141 (17.82%)                                 | 15,447 (18.18%)                                  | 67,965 (18.95%)                               | -0.03                         | <.0001                      | -0.01                        | 0.0541                     |
| Valvular Heart Disease                                         | 42,738 (50.29%)                             | 42,738 (50.29%)                                 | 43,251 (50.89%)                                  | 180,048 (50.19%)                              | 0.00                          | 0.6065                      | -0.01                        | 0.0130                     |
| Hypertension                                                   | 78,570 (92.45%)                             | 78,570 (92.45%)                                 | 77,942 (91.71%)                                  | 331,282 (92.35%)                              | 0.00                          | 0.3145                      | 0.03                         | <.0001                     |
| Stroke                                                         | 7,267 (8.55%)                               | 7,267 (8.55%)                                   | 5,803 (6.83%)                                    | 26,450 (7.37%)                                | 0.04                          | <.0001                      | 0.06                         | <.0001                     |
| Cerebrovascular Disease                                        | 15,083 (17.75%)                             | 15,083 (17.75%)                                 | 13,755 (16.19%)                                  | 63,597 (17.73%)                               | 0.00                          | 0.8927                      | 0.04                         | <.0001                     |
| Renal Failure                                                  | 34,816 (40.97%)                             | 34,816 (40.97%)                                 | 34,454 (40.54%)                                  | 137,651 (38.37%)                              | 0.05                          | <.0001                      | 0.01                         | 0.0747                     |
| COPD                                                           | 33,042 (38.88%)                             | 33,042 (38.88%)                                 | 32,890 (38.70%)                                  | 162,744 (45.37%)                              | -0.13                         | <.0001                      | 0.00                         | 0.4523                     |
| Pneumonia; pleural effusion/pneumothorax                       | 33,777 (39.74%)                             | 33,777 (39.74%)                                 | 33,808 (39.78%)                                  | 152,116 (42.40%)                              | -0.05                         | <.0001                      | 0.00                         | 0.8818                     |
| Diabetes                                                       | 45,696 (53.77%)                             | 45,696 (53.77%)                                 | 45,337 (53.35%)                                  | 184,895 (51.54%)                              | 0.04                          | <.0001                      | 0.01                         | 0.0817                     |
| Malnutrition                                                   | 6,912 (8.13%)                               | 6,912 (8.13%)                                   | 6,682 (7.86%)                                    | 28,983 (8.08%)                                | 0.00                          | 0.6047                      | 0.01                         | 0.0406                     |
| Dementia or other specified brain disorders                    | 18,110 (21.31%)                             | 18,110 (21.31%)                                 | 16,958 (19.95%)                                  | 82,197 (22.91%)                               | -0.04                         | <.0001                      | 0.03                         | <.0001                     |
| Hemiplegia, paraplegia, paralysis, functional disability       | 6,086 (7.16%)                               | 6,086 (7.16%)                                   | 4,731 (5.57%)                                    | 24,384 (6.80%)                                | 0.01                          | 0.0002                      | 0.06                         | <.0001                     |
| Vascular disease and complications                             | 30,300 (35.65%)                             | 30,300 (35.65%)                                 | 30,011 (35.31%)                                  | 112,228 (31.28%)                              | 0.09                          | <.0001                      | 0.01                         | 0.1443                     |
| Cancer                                                         | 4,000 (4.71%)                               | 4,000 (4.71%)                                   | 3,348 (3.94%)                                    | 14,251 (3.97%)                                | 0.04                          | <.0001                      | 0.04                         | <.0001                     |
| Trauma; other injuries                                         | 25,226 (29.68%)                             | 25,226 (29.68%)                                 | 24,977 (29.39%)                                  | 106,285 (29.63%)                              | 0.00                          | 0.7541                      | 0.01                         | 0.1873                     |
| Major psychiatric disorders                                    | 7,913 (9.31%)                               | 7,913 (9.31%)                                   | 6,782 (7.98%)                                    | 33,700 (9.39%)                                | 0.00                          | 0.4597                      | 0.05                         | <.0001                     |
| Chronic Liver Disease                                          | 3,088 (3.63%)                               | 3,088 (3.63%)                                   | 2,473 (2.91%)                                    | 9,343 (2.60%)                                 | 0.06                          | <.0001                      | 0.04                         | <.0001                     |
| Severe hematological disorders                                 | 2,017 (2.37%)                               | 2,017 (2.37%)                                   | 1,519 (1.79%)                                    | 7,411 (2.07%)                                 | 0.02                          | <.0001                      | 0.04                         | <.0001                     |
| Iron deficiency or other/unspecified anemias and blood disease | 50,705 (59.66%)                             | 50,705 (59.66%)                                 | 50,984 (59.99%)                                  | 205,039 (57.16%)                              | 0.05                          | <.0001                      | -0.01                        | 0.1690                     |
| Depression                                                     | 15,821 (18.62%)                             | 15,821 (18.62%)                                 | 14,806 (17.42%)                                  | 67,037 (18.69%)                               | 0.00                          | 0.6349                      | 0.03                         | <.0001                     |
| Parkinson's and Huntington's diseases                          | 1,860 (2.19%)                               | 1,860 (2.19%)                                   | 1,464 (1.72%)                                    | 8,609 (2.40%)                                 | -0.01                         | 0.0002                      | 0.03                         | <.0001                     |
| Seizure disorders and convulsions                              | 3,272 (3.85%)                               | 3,272 (3.85%)                                   | 2,554 (3.01%)                                    | 12,213 (3.40%)                                | 0.02                          | <.0001                      | 0.05                         | <.0001                     |
| Fibrosis of lung or other chronic lung disorders               | 6,303 (7.42%)                               | 6,303 (7.42%)                                   | 5,140 (6.05%)                                    | 30,446 (8.49%)                                | -0.04                         | <.0001                      | 0.05                         | <.0001                     |
| Asthma                                                         | 8,364 (9.84%)                               | 8,364 (9.84%)                                   | 7,054 (8.30%)                                    | 29,639 (8.26%)                                | 0.06                          | <.0001                      | 0.05                         | <.0001                     |
| <b>Predicted Risk</b>                                          |                                             |                                                 |                                                  |                                               |                               |                             |                              |                            |
| 30-Day Mortality Risk Quintile 1                               | 19,968 (23.50%)                             | 19,968 (23.50%)                                 | 19,968 (23.50%)                                  | 68,769 (19.17%)                               | 0.11                          | <.0001                      | 0.00                         | 1.0000                     |
| 30-Day Mortality Risk Quintile 2                               | 16,803 (19.77%)                             | 16,803 (19.77%)                                 | 16,803 (19.77%)                                  | 71,944 (20.06%)                               | -0.01                         | 0.0636                      | 0.00                         | 1.0000                     |
| 30-Day Mortality Risk Quintile 3                               | 16,184 (19.04%)                             | 16,184 (19.04%)                                 | 16,184 (19.04%)                                  | 72,542 (20.22%)                               | -0.03                         | <.0001                      | 0.00                         | 1.0000                     |
| 30-Day Mortality Risk Quintile 4                               | 15,995 (18.82%)                             | 15,995 (18.82%)                                 | 15,995 (18.82%)                                  | 72,763 (20.28%)                               | -0.04                         | <.0001                      | 0.00                         | 1.0000                     |
| 30-Day Mortality Risk Quintile 5                               | 16,035 (18.87%)                             | 16,035 (18.87%)                                 | 16,035 (18.87%)                                  | 72,711 (20.27%)                               | -0.04                         | <.0001                      | 0.00                         | 1.0000                     |
| Mean 30-day mortality risk quintile                            | 2.9                                         | 2.9                                             | 2.9                                              | 3.0                                           | -0.09                         | <.0001                      | 0.00                         | 1.0000                     |
| Mean ICU risk quintile                                         | 3.1                                         | 3.1                                             | 3.1                                              | 3.0                                           | 0.06                          | <.0001                      | 0.01                         | 0.2548                     |
| Mean LOS risk quintile                                         | 3.0                                         | 3.0                                             | 3.0                                              | 3.0                                           | -0.01                         | 0.1455                      | 0.03                         | <.0001                     |
| Mean cost risk quintile                                        | 3.0                                         | 3.0                                             | 3.0                                              | 3.0                                           | 0.02                          | <.0001                      | 0.03                         | <.0001                     |
| Risk score for 30-Day Mortality (mean)                         | 9.7%                                        | 9.7%                                            | 9.6%                                             | 10.1%                                         | -0.06                         | <.0001                      | 0.01                         | 0.9121                     |
| Predicted ICU Utilization (mean)                               | 51.9%                                       | 51.9%                                           | 51.8%                                            | 51.5%                                         | 0.06                          | <.0001                      | 0.01                         | 0.2172                     |
| Predicted LOS (mean)                                           | 4.4                                         | 4.4                                             | 4.4                                              | 4.4                                           | 0.00                          | 0.1236                      | 0.02                         | <.0001                     |
| Predicted Cost (mean)                                          | 14,437                                      | 14,437                                          | 14,380                                           | 14,355                                        | 0.03                          | <.0001                      | 0.02                         | <.0001                     |

| Variable                                                             | All Major Teaching Cases<br>N=84,985 | Matched Major Teaching Cases<br>N=84,985 | Matched Non-Teaching Controls<br>N=84,985 | All Non-Teaching Controls<br>N=358,729 | Std. Diff Before Match | P-value Before Match | Std. Diff After Match | P-value After Match |  |
|----------------------------------------------------------------------|--------------------------------------|------------------------------------------|-------------------------------------------|----------------------------------------|------------------------|----------------------|-----------------------|---------------------|--|
| <b>Hospital Characteristics (Not Included in Matching Algorithm)</b> |                                      |                                          |                                           |                                        |                        |                      |                       |                     |  |
| Total Beds                                                           | 559.7                                | 559.7                                    | 227.6                                     | 237.5                                  | 1.07                   | <.0001               | 1.10                  | <.0001              |  |
| Size Small ( $\leq 100$ beds)                                        | 921 (1.08%)                          | 921 (1.08%)                              | 18,045 (21.23%)                           | 84,711 (23.61%)                        | -0.73                  | <.0001               | -0.65                 | <.0001              |  |
| Size Medium ( $>100$ to $\leq 250$ beds)                             | 11,106 (13.07%)                      | 11,106 (13.07%)                          | 36,879 (43.39%)                           | 142,231 (39.65%)                       | -0.63                  | <.0001               | -0.72                 | <.0001              |  |
| Size Large ( $>250$ beds)                                            | 72,958 (85.85%)                      | 72,958 (85.85%)                          | 30,061 (35.37%)                           | 131,787 (36.74%)                       | 1.17                   | <.0001               | 1.20                  | <.0001              |  |
| COTH Member                                                          | 59,135 (69.58%)                      | 59,135 (69.58%)                          | --                                        | --                                     | --                     | --                   | --                    | --                  |  |
| RB Ratio (mean)                                                      | 0.50                                 | 0.50                                     | 0.00                                      | 0.00                                   | 2.97                   | <.0001               | 2.96                  | <.0001              |  |
| Very Major Teaching Hospital ( $0.60 \leq RB$ )                      | 24,499 (28.83%)                      | 24,499 (28.83%)                          | --                                        | --                                     | --                     | --                   | --                    | --                  |  |
| Major Teaching Hospital ( $0.25 < RB < 0.60$ )                       | 60,486 (71.17%)                      | 60,486 (71.17%)                          | --                                        | --                                     | --                     | --                   | --                    | --                  |  |
| Minor Teaching Hospital ( $0.05 < RB \leq 0.25$ )                    | --                                   | --                                       | --                                        | --                                     | --                     | --                   | --                    | --                  |  |
| Very Minor Teaching Hospital ( $0.0 < RB \leq 0.05$ )                | --                                   | --                                       | 17,841 (20.99%)                           | 68,597 (19.12%)                        | 0.00                   | <.0001               | 0.00                  | <.0001              |  |
| Nonteaching Hospital ( $RB = 0$ )                                    | --                                   | --                                       | 67,144 (79.01%)                           | 290,132 (80.88%)                       | 0.00                   | <.0001               | 0.00                  | <.0001              |  |
| NB Ratio (mean)                                                      | 1.68                                 | 1.68                                     | 1.45                                      | 1.39                                   | 0.09                   | <.0001               | 0.07                  | <.0001              |  |
| NB Ratio High ( $1.0 \leq NB$ )                                      | 73,112 (86.03%)                      | 73,112 (86.03%)                          | 60,373 (71.04%)                           | 247,761 (69.07%)                       | 0.42                   | <.0001               | 0.37                  | <.0001              |  |
| NB Ratio Moderate ( $0.5 \leq NB < 1.0$ )                            | 8,902 (10.47%)                       | 8,902 (10.47%)                           | 18,998 (22.35%)                           | 84,261 (23.49%)                        | -0.35                  | <.0001               | -0.32                 | <.0001              |  |
| NB Ratio Low ( $NB < 0.5$ )                                          | 2,969 (3.49%)                        | 2,969 (3.49%)                            | 5,169 (6.08%)                             | 24,780 (6.91%)                         | -0.15                  | <.0001               | -0.12                 | <.0001              |  |
| NB Ratio Missing                                                     | --                                   | --                                       | 445 (0.52%)                               | 1,927 (0.54%)                          | --                     | --                   | --                    | --                  |  |
| Nurse-Mix (mean)                                                     | 0.94                                 | 0.94                                     | 0.90                                      | 0.88                                   | 0.48                   | <.0001               | 0.37                  | <.0001              |  |
| Nurse-Mix High ( $90 < \% RN$ )                                      | 72,120 (84.86%)                      | 72,120 (84.86%)                          | 53,560 (63.02%)                           | 209,278 (58.34%)                       | 0.62                   | <.0001               | 0.51                  | <.0001              |  |
| Nurse-Mix Moderate ( $75 \leq \% RN \leq 90$ )                       | 10,249 (12.06%)                      | 10,249 (12.06%)                          | 23,229 (27.33%)                           | 104,180 (29.04%)                       | -0.43                  | <.0001               | -0.39                 | <.0001              |  |
| Nurse-Mix Low ( $\% RN < 75$ )                                       | 2,076 (2.44%)                        | 2,076 (2.44%)                            | 7,171 (8.44%)                             | 41,435 (11.55%)                        | -0.36                  | <.0001               | -0.24                 | <.0001              |  |
| Nurse-Mix Missing                                                    | 540 (0.64%)                          | 540 (0.64%)                              | 1,025 (1.21%)                             | 3,836 (1.07%)                          | -0.05                  | <.0001               | -0.06                 | <.0001              |  |
| High Technology Hospital                                             | 19,003 (22.36%)                      | 19,003 (22.36%)                          | 16,970 (19.97%)                           | 72,632 (20.25%)                        | 0.05                   | <.0001               | 0.06                  | <.0001              |  |
| Dual-Eligible                                                        | 78,096 (91.89%)                      | 78,096 (91.89%)                          | 53,305 (62.72%)                           | 229,650 (64.02%)                       | 0.71                   | <.0001               | 0.75                  | <.0001              |  |

“--” indicates a blank cell.

**Appendix Table 9c. Complete Matching Table for PNA** The table below reports balance before and after matching between patients admitted to major teaching or non-teaching hospitals for pneumonia. All covariates met balance criteria.

| <b>Variable</b>                                      | <b>All Major Teaching Cases</b><br>N=74,947 | <b>Matched Major Teaching Cases</b><br>N=74,947 | <b>Matched Non-Teaching Controls</b><br>N=74,947 | <b>All Non-Teaching Controls</b><br>N=453,186 | <b>Std. Diff Before Match</b> | <b>P-value Before Match</b> | <b>Std. Diff After Match</b> | <b>P-value After Match</b> |  |
|------------------------------------------------------|---------------------------------------------|-------------------------------------------------|--------------------------------------------------|-----------------------------------------------|-------------------------------|-----------------------------|------------------------------|----------------------------|--|
| Number of Hospitals                                  | 337                                         | 337                                             | 2,351                                            | 2,501                                         |                               |                             |                              |                            |  |
| <b>Demographics</b>                                  |                                             |                                                 |                                                  |                                               |                               |                             |                              |                            |  |
| Sex (% male)                                         | 35,176 (46.93%)                             | 35,176 (46.93%)                                 | 35,404 (47.24%)                                  | 210,190 (46.38%)                              | 0.01                          | 0.0049                      | -0.01                        | 0.2401                     |  |
| Age (mean)                                           | 80.7                                        | 80.7                                            | 80.7                                             | 80.5                                          | 0.02                          | <.0001                      | 0.01                         | 0.3013                     |  |
| Age 65-69                                            | 9,744 (13.00%)                              | 9,744 (13.00%)                                  | 9,441 (12.60%)                                   | 55,490 (12.24%)                               | 0.02                          | <.0001                      | 0.01                         | 0.0195                     |  |
| Age 70-74                                            | 11,314 (15.10%)                             | 11,314 (15.10%)                                 | 11,294 (15.07%)                                  | 70,477 (15.55%)                               | -0.01                         | 0.0014                      | 0.00                         | 0.8909                     |  |
| Age 75-79                                            | 12,060 (16.09%)                             | 12,060 (16.09%)                                 | 12,407 (16.55%)                                  | 78,725 (17.37%)                               | -0.03                         | <.0001                      | -0.01                        | 0.0156                     |  |
| Age 80-84                                            | 13,929 (18.59%)                             | 13,929 (18.59%)                                 | 14,677 (19.58%)                                  | 88,530 (19.54%)                               | -0.02                         | <.0001                      | -0.03                        | <.0001                     |  |
| Age 85+                                              | 27,900 (37.23%)                             | 27,900 (37.23%)                                 | 27,128 (36.20%)                                  | 159,964 (35.30%)                              | 0.04                          | <.0001                      | 0.02                         | <.0001                     |  |
| Year (mean)                                          | 2013.1                                      | 2013.1                                          | 2013.1                                           | 2013.1                                        | -0.01                         | 0.0762                      | 0.00                         | 0.7303                     |  |
| Year 2012                                            | 17,864 (23.84%)                             | 17,864 (23.84%)                                 | 17,755 (23.69%)                                  | 106,766 (23.56%)                              | 0.01                          | 0.0993                      | 0.00                         | 0.5122                     |  |
| Year 2013                                            | 32,798 (43.76%)                             | 32,798 (43.76%)                                 | 33,098 (44.16%)                                  | 198,449 (43.79%)                              | 0.00                          | 0.8862                      | -0.01                        | 0.1197                     |  |
| Year 2014                                            | 24,285 (32.40%)                             | 24,285 (32.40%)                                 | 24,094 (32.15%)                                  | 147,971 (32.65%)                              | -0.01                         | 0.1797                      | 0.01                         | 0.2939                     |  |
| Race- non-Hispanic White                             | 55,858 (74.53%)                             | 55,858 (74.53%)                                 | 56,672 (75.62%)                                  | 388,780 (85.79%)                              | -0.29                         | <.0001                      | -0.03                        | <.0001                     |  |
| Race- Black                                          | 11,153 (14.88%)                             | 11,153 (14.88%)                                 | 10,869 (14.50%)                                  | 28,556 (6.30%)                                | 0.28                          | <.0001                      | 0.01                         | 0.0389                     |  |
| Race- Hispanic                                       | 4,771 (6.37%)                               | 4,771 (6.37%)                                   | 4,164 (5.56%)                                    | 21,539 (4.75%)                                | 0.07                          | <.0001                      | 0.04                         | <.0001                     |  |
| Race- Other                                          | 3,165 (4.22%)                               | 3,165 (4.22%)                                   | 3,242 (4.33%)                                    | 14,311 (3.16%)                                | 0.06                          | <.0001                      | -0.01                        | 0.3318                     |  |
| Emergent type admission                              | 67,711 (90.35%)                             | 67,711 (90.35%)                                 | 67,382 (89.91%)                                  | 353,418 (77.99%)                              | 0.34                          | <.0001                      | 0.01                         | 0.0045                     |  |
| Treatment at another hospital's ED                   | 13 (0.02%)                                  | 13 (0.02%)                                      | --                                               | 84 (0.02%)                                    | 0.00                          | 1.0000                      | --                           | --                         |  |
| Prior care at SNF                                    | 663 (0.88%)                                 | 663 (0.88%)                                     | 793 (1.06%)                                      | 3,924 (0.87%)                                 | 0.00                          | 0.6101                      | -0.02                        | 0.0007                     |  |
| Prior care at ASC                                    | 38 (0.05%)                                  | 38 (0.05%)                                      | 36 (0.05%)                                       | 2,042 (0.45%)                                 | -0.08                         | <.0001                      | 0.00                         | 0.9075                     |  |
| Prior intermediate care facility visit               | 93 (0.12%)                                  | 93 (0.12%)                                      | 68 (0.09%)                                       | 2,506 (0.55%)                                 | -0.07                         | <.0001                      | 0.01                         | 0.0581                     |  |
| Prior dialysis visit                                 | 451 (0.60%)                                 | 451 (0.60%)                                     | 402 (0.54%)                                      | 3,520 (0.78%)                                 | -0.02                         | <.0001                      | 0.01                         | 0.0993                     |  |
| Region Northeast                                     | 37,452 (49.97%)                             | 37,452 (49.97%)                                 | 37,516 (50.06%)                                  | 90,006 (19.86%)                               | 0.67                          | <.0001                      | 0.00                         | 0.7448                     |  |
| Region Midwest                                       | 21,930 (29.26%)                             | 21,930 (29.26%)                                 | 21,627 (28.86%)                                  | 98,939 (21.83%)                               | 0.17                          | <.0001                      | 0.01                         | 0.0858                     |  |
| Region Pacific                                       | 4,463 (5.95%)                               | 4,463 (5.95%)                                   | 4,712 (6.29%)                                    | 50,731 (11.19%)                               | -0.19                         | <.0001                      | -0.01                        | 0.0075                     |  |
| Region South                                         | 9,926 (13.24%)                              | 9,926 (13.24%)                                  | 9,922 (13.24%)                                   | 189,601 (41.84%)                              | -0.68                         | <.0001                      | 0.00                         | 0.9818                     |  |
| Region Rockies                                       | 1,176 (1.57%)                               | 1,176 (1.57%)                                   | 1,170 (1.56%)                                    | 23,909 (5.28%)                                | -0.20                         | <.0001                      | 0.00                         | 0.9171                     |  |
| <b>Admission Conditions</b>                          |                                             |                                                 |                                                  |                                               |                               |                             |                              |                            |  |
| Pneumonia Due to Anaerobes or Gram-Negative Bacteria | 2,155 (2.88%)                               | 2,155 (2.88%)                                   | 2,155 (2.88%)                                    | 11,129 (2.46%)                                | 0.03                          | <.0001                      | 0.00                         | 1.0000                     |  |
| Aspiration Pneumonia                                 | 14,909 (19.89%)                             | 14,909 (19.89%)                                 | 14,909 (19.89%)                                  | 79,901 (17.63%)                               | 0.06                          | <.0001                      | 0.00                         | 1.0000                     |  |
| Pneumonia Due to H. Influenza                        | 176 (0.23%)                                 | 176 (0.23%)                                     | 176 (0.23%)                                      | 1,297 (0.29%)                                 | -0.01                         | 0.0135                      | 0.00                         | 1.0000                     |  |
| Legionnaire's Disease                                | 206 (0.27%)                                 | 206 (0.27%)                                     | 206 (0.27%)                                      | 403 (0.09%)                                   | 0.04                          | <.0001                      | 0.00                         | 1.0000                     |  |

| Variable                                                       | All Major Teaching Cases<br>N=74,947 | Matched Major Teaching Cases<br>N=74,947 | Matched Non-Teaching Controls<br>N=74,947 | All Non-Teaching Controls<br>N=453,186 | Std. Diff Before Match | P-value Before Match | Std. Diff After Match | P-value After Match |
|----------------------------------------------------------------|--------------------------------------|------------------------------------------|-------------------------------------------|----------------------------------------|------------------------|----------------------|-----------------------|---------------------|
| Pneumonia Due to MRSA                                          | 1,148 (1.53%)                        | 1,148 (1.53%)                            | 1,148 (1.53%)                             | 8,121 (1.79%)                          | -0.02                  | <.0001               | 0.00                  | 1.0000              |
| Pneumonia, Other                                               | 51,556 (68.79%)                      | 51,556 (68.79%)                          | 51,556 (68.79%)                           | 331,408 (73.13%)                       | -0.10                  | <.0001               | 0.00                  | 1.0000              |
| Pneumococcal Pneumonia                                         | 774 (1.03%)                          | 774 (1.03%)                              | 774 (1.03%)                               | 4,280 (0.94%)                          | 0.01                   | 0.0221               | 0.00                  | 1.0000              |
| Pneumonia Due to Pseudomonas                                   | 918 (1.22%)                          | 918 (1.22%)                              | 918 (1.22%)                               | 5,405 (1.19%)                          | 0.00                   | 0.4573               | 0.00                  | 1.0000              |
| Streptococcal Pneumoniae                                       | 233 (0.31%)                          | 233 (0.31%)                              | 233 (0.31%)                               | 1,427 (0.31%)                          | 0.00                   | 0.8880               | 0.00                  | 1.0000              |
| Staphylococcal Pneumonia                                       | 75 (0.10%)                           | 75 (0.10%)                               | 75 (0.10%)                                | 498 (0.11%)                            | 0.00                   | 0.4728               | 0.00                  | 1.0000              |
| Viral Pneumonia                                                | 2,797 (3.73%)                        | 2,797 (3.73%)                            | 2,797 (3.73%)                             | 9,317 (2.06%)                          | 0.10                   | <.0001               | 0.00                  | 1.0000              |
| <b>Comorbidities</b>                                           |                                      |                                          |                                           |                                        |                        |                      |                       |                     |
| History of PTCA                                                | 3,821 (5.10%)                        | 3,821 (5.10%)                            | 3,912 (5.22%)                             | 23,310 (5.14%)                         | 0.00                   | 0.6107               | -0.01                 | 0.2933              |
| History of CABG                                                | 4,224 (5.64%)                        | 4,224 (5.64%)                            | 4,219 (5.63%)                             | 28,172 (6.22%)                         | -0.02                  | <.0001               | 0.00                  | 0.9643              |
| Heart Failure                                                  | 24,019 (32.05%)                      | 24,019 (32.05%)                          | 24,454 (32.63%)                           | 137,172 (30.27%)                       | 0.04                   | <.0001               | -0.01                 | 0.0166              |
| Myocardial Infarction                                          | 1,294 (1.73%)                        | 1,294 (1.73%)                            | 1,069 (1.43%)                             | 6,609 (1.46%)                          | 0.02                   | <.0001               | 0.02                  | <.0001              |
| Unstable Angina                                                | 3,477 (4.64%)                        | 3,477 (4.64%)                            | 3,082 (4.11%)                             | 14,875 (3.28%)                         | 0.07                   | <.0001               | 0.03                  | <.0001              |
| Cardio-respiratory Failure or Shock                            | 13,672 (18.24%)                      | 13,672 (18.24%)                          | 13,937 (18.60%)                           | 86,943 (19.18%)                        | -0.02                  | <.0001               | -0.01                 | 0.0786              |
| Valvular Heart Disease                                         | 16,945 (22.61%)                      | 16,945 (22.61%)                          | 17,351 (23.15%)                           | 99,358 (21.92%)                        | 0.02                   | <.0001               | -0.01                 | 0.0128              |
| Hypertension                                                   | 65,168 (86.95%)                      | 65,168 (86.95%)                          | 64,978 (86.70%)                           | 391,800 (86.45%)                       | 0.01                   | 0.0002               | 0.01                  | 0.1489              |
| Stroke                                                         | 8,340 (11.13%)                       | 8,340 (11.13%)                           | 9,561 (12.76%)                            | 42,637 (9.41%)                         | 0.06                   | <.0001               | -0.05                 | <.0001              |
| Cerebrovascular Disease                                        | 15,434 (20.59%)                      | 15,434 (20.59%)                          | 16,502 (22.02%)                           | 87,483 (19.30%)                        | 0.03                   | <.0001               | -0.04                 | <.0001              |
| Renal Failure                                                  | 20,895 (27.88%)                      | 20,895 (27.88%)                          | 20,129 (26.86%)                           | 112,634 (24.85%)                       | 0.07                   | <.0001               | 0.02                  | <.0001              |
| COPD                                                           | 32,862 (43.85%)                      | 32,862 (43.85%)                          | 32,993 (44.02%)                           | 235,793 (52.03%)                       | -0.16                  | <.0001               | 0.00                  | 0.4987              |
| Pneumonia; pleural effusion/pneumothorax                       | 59,720 (79.68%)                      | 59,720 (79.68%)                          | 61,347 (81.85%)                           | 374,648 (82.67%)                       | -0.08                  | <.0001               | -0.06                 | <.0001              |
| Diabetes                                                       | 31,822 (42.46%)                      | 31,822 (42.46%)                          | 30,905 (41.24%)                           | 183,771 (40.55%)                       | 0.04                   | <.0001               | 0.02                  | <.0001              |
| Malnutrition                                                   | 11,665 (15.56%)                      | 11,665 (15.56%)                          | 11,371 (15.17%)                           | 64,302 (14.19%)                        | 0.04                   | <.0001               | 0.01                  | 0.0359              |
| Dementia or other specified brain disorders                    | 27,706 (36.97%)                      | 27,706 (36.97%)                          | 27,600 (36.83%)                           | 160,009 (35.31%)                       | 0.03                   | <.0001               | 0.00                  | 0.5741              |
| Hemiplegia, paraplegia, paralysis, functional disability       | 8,731 (11.65%)                       | 8,731 (11.65%)                           | 9,992 (13.33%)                            | 44,496 (9.82%)                         | 0.06                   | <.0001               | -0.05                 | <.0001              |
| Vascular disease and complications                             | 26,110 (34.84%)                      | 26,110 (34.84%)                          | 26,195 (34.95%)                           | 132,570 (29.25%)                       | 0.12                   | <.0001               | 0.00                  | 0.6490              |
| Cancer                                                         | 8,711 (11.62%)                       | 8,711 (11.62%)                           | 8,297 (11.07%)                            | 40,842 (9.01%)                         | 0.09                   | <.0001               | 0.02                  | 0.0008              |
| Trauma; other injuries                                         | 26,467 (35.31%)                      | 26,467 (35.31%)                          | 26,744 (35.68%)                           | 152,548 (33.66%)                       | 0.03                   | <.0001               | -0.01                 | 0.1363              |
| Major psychiatric disorders                                    | 12,428 (16.58%)                      | 12,428 (16.58%)                          | 11,647 (15.54%)                           | 70,679 (15.60%)                        | 0.03                   | <.0001               | 0.03                  | <.0001              |
| Chronic Liver Disease                                          | 2,047 (2.73%)                        | 2,047 (2.73%)                            | 1,707 (2.28%)                             | 8,865 (1.96%)                          | 0.05                   | <.0001               | 0.03                  | <.0001              |
| Severe hematological disorders                                 | 1,951 (2.60%)                        | 1,951 (2.60%)                            | 1,345 (1.79%)                             | 8,981 (1.98%)                          | 0.04                   | <.0001               | 0.05                  | <.0001              |
| Iron deficiency or other/unspecified anemias and blood disease | 45,187 (60.29%)                      | 45,187 (60.29%)                          | 46,026 (61.41%)                           | 256,867 (56.68%)                       | 0.07                   | <.0001               | -0.02                 | <.0001              |
| Depression                                                     | 19,008 (25.36%)                      | 19,008 (25.36%)                          | 17,941 (23.94%)                           | 109,638 (24.19%)                       | 0.03                   | <.0001               | 0.03                  | <.0001              |
| Parkinson's and Huntington's diseases                          | 4,088 (5.45%)                        | 4,088 (5.45%)                            | 4,255 (5.68%)                             | 23,170 (5.11%)                         | 0.02                   | 0.0001               | -0.01                 | 0.0615              |
| Seizure disorders and convulsions                              | 5,846 (7.80%)                        | 5,846 (7.80%)                            | 5,066 (6.76%)                             | 28,437 (6.27%)                         | 0.06                   | <.0001               | 0.04                  | <.0001              |
| Fibrosis of lung or other chronic lung disorders               | 9,492 (12.66%)                       | 9,492 (12.66%)                           | 10,074 (13.44%)                           | 61,054 (13.47%)                        | -0.02                  | <.0001               | -0.02                 | <.0001              |



| Variable                                                             | All Major Teaching Cases<br>N=74,947 | Matched Major Teaching Cases<br>N=74,947 | Matched Non-Teaching Controls<br>N=74,947 | All Non-Teaching Controls<br>N=453,186 | Std. Diff Before Match | P-value Before Match | Std. Diff After Match | P-value After Match |
|----------------------------------------------------------------------|--------------------------------------|------------------------------------------|-------------------------------------------|----------------------------------------|------------------------|----------------------|-----------------------|---------------------|
| Asthma                                                               | 8,940 (11.93%)                       | 8,940 (11.93%)                           | 9,105 (12.15%)                            | 47,771 (10.54%)                        | 0.04                   | <.0001               | -0.01                 | 0.1930              |
| <b>Predicted Risk</b>                                                |                                      |                                          |                                           |                                        |                        |                      |                       |                     |
| 30-Day Mortality Risk Quintile 1                                     | 13,975 (18.65%)                      | 13,975 (18.65%)                          | 13,975 (18.65%)                           | 91,649 (20.22%)                        | -0.04                  | <.0001               | 0.00                  | 1.0000              |
| 30-Day Mortality Risk Quintile 2                                     | 13,888 (18.53%)                      | 13,888 (18.53%)                          | 13,888 (18.53%)                           | 91,371 (20.16%)                        | -0.04                  | <.0001               | 0.00                  | 1.0000              |
| 30-Day Mortality Risk Quintile 3                                     | 14,904 (19.89%)                      | 14,904 (19.89%)                          | 14,904 (19.89%)                           | 91,091 (20.10%)                        | -0.01                  | 0.1758               | 0.00                  | 1.0000              |
| 30-Day Mortality Risk Quintile 4                                     | 15,279 (20.39%)                      | 15,279 (20.39%)                          | 15,279 (20.39%)                           | 90,342 (19.93%)                        | 0.01                   | 0.0043               | 0.00                  | 1.0000              |
| 30-Day Mortality Risk Quintile 5                                     | 16,901 (22.55%)                      | 16,901 (22.55%)                          | 16,901 (22.55%)                           | 88,733 (19.58%)                        | 0.07                   | <.0001               | 0.00                  | 1.0000              |
| Mean 30-day mortality risk quintile                                  | 3.1                                  | 3.1                                      | 3.1                                       | 3.0                                    | 0.08                   | <.0001               | 0.00                  | 1.0000              |
| Mean ICU risk quintile                                               | 3.1                                  | 3.1                                      | 3.1                                       | 3.0                                    | 0.11                   | <.0001               | 0.02                  | 0.0040              |
| Mean LOS risk quintile                                               | 3.1                                  | 3.1                                      | 3.1                                       | 3.0                                    | 0.11                   | <.0001               | 0.02                  | 0.0021              |
| Mean cost risk quintile                                              | 3.2                                  | 3.2                                      | 3.1                                       | 3.0                                    | 0.13                   | <.0001               | 0.02                  | 0.0002              |
| Risk score for 30-Day Mortality (mean)                               | 14.5%                                | 14.5%                                    | 14.4%                                     | 13.4%                                  | 0.09                   | <.0001               | 0.00                  | 0.8054              |
| Predicted ICU Utilization (mean)                                     | 36.0%                                | 36.0%                                    | 35.9%                                     | 34.9%                                  | 0.12                   | <.0001               | 0.01                  | 0.0019              |
| Predicted LOS (mean)                                                 | 5.0                                  | 5.0                                      | 5.0                                       | 4.9                                    | 0.10                   | <.0001               | 0.01                  | 0.0006              |
| Predicted Cost (mean)                                                | 12,983                               | 12,983                                   | 12,933                                    | 12,572                                 | 0.13                   | <.0001               | 0.02                  | 0.0001              |
| <b>Hospital Characteristics (Not Included in Matching Algorithm)</b> |                                      |                                          |                                           |                                        |                        |                      |                       |                     |
| Total Beds                                                           | 558.1                                | 558.1                                    | 221.8                                     | 224.2                                  | 1.13                   | <.0001               | 1.14                  | <.0001              |
| Size Small ( $\leq 100$ beds)                                        | 947 (1.26%)                          | 947 (1.26%)                              | 16,762 (22.37%)                           | 120,774 (26.65%)                       | -0.79                  | <.0001               | -0.65                 | <.0001              |
| Size Medium ( $>100$ to $\leq 250$ beds)                             | 10,428 (13.91%)                      | 10,428 (13.91%)                          | 32,861 (43.85%)                           | 178,844 (39.46%)                       | -0.60                  | <.0001               | -0.71                 | <.0001              |
| Size Large ( $>250$ beds)                                            | 63,572 (84.82%)                      | 63,572 (84.82%)                          | 25,324 (33.79%)                           | 153,568 (33.89%)                       | 1.21                   | <.0001               | 1.22                  | <.0001              |
| COTH Member                                                          | 51,492 (68.70%)                      | 51,492 (68.70%)                          | --                                        | --                                     | --                     | --                   | --                    | --                  |
| RB Ratio (mean)                                                      | 0.50                                 | 0.50                                     | 0.00                                      | 0.00                                   | 2.93                   | <.0001               | 2.92                  | <.0001              |
| Very Major Teaching Hospital ( $0.60 \leq RB$ )                      | 21,541 (28.74%)                      | 21,541 (28.74%)                          | --                                        | --                                     | --                     | --                   | --                    | --                  |
| Major Teaching Hospital ( $0.25 < RB < 0.60$ )                       | 53,406 (71.26%)                      | 53,406 (71.26%)                          | --                                        | --                                     | --                     | --                   | --                    | --                  |
| Minor Teaching Hospital ( $0.05 < RB \leq 0.25$ )                    | --                                   | --                                       | --                                        | --                                     | --                     | --                   | --                    | --                  |
| Very Minor Teaching Hospital ( $0.0 < RB \leq 0.05$ )                | --                                   | --                                       | 14,273 (19.04%)                           | 78,063 (17.23%)                        | --                     | --                   | --                    | --                  |
| Nonteaching Hospital ( $RB = 0$ )                                    | --                                   | --                                       | 60,674 (80.96%)                           | 375,123 (82.77%)                       | --                     | --                   | --                    | --                  |
| NB Ratio (mean)                                                      | 1.67                                 | 1.67                                     | 1.44                                      | 1.37                                   | 0.10                   | <.0001               | 0.08                  | <.0001              |
| NB Ratio High ( $1.0 \leq NB$ )                                      | 63,955 (85.33%)                      | 63,955 (85.33%)                          | 53,267 (71.07%)                           | 310,924 (68.61%)                       | 0.41                   | <.0001               | 0.35                  | <.0001              |
| NB Ratio Moderate ( $0.5 \leq NB < 1.0$ )                            | 8,343 (11.13%)                       | 8,343 (11.13%)                           | 16,845 (22.48%)                           | 108,686 (23.98%)                       | -0.34                  | <.0001               | -0.30                 | <.0001              |
| NB Ratio Low ( $NB < 0.5$ )                                          | 2,646 (3.53%)                        | 2,646 (3.53%)                            | 4,173 (5.57%)                             | 30,557 (6.74%)                         | -0.15                  | <.0001               | -0.09                 | <.0001              |
| NB Ratio Missing                                                     | --                                   | --                                       | 662 (0.88%)                               | 3,019 (0.67%)                          | --                     | --                   | --                    | --                  |
| Nurse-Mix (mean)                                                     | 0.94                                 | 0.94                                     | 0.90                                      | 0.88                                   | 0.48                   | <.0001               | 0.34                  | <.0001              |
| Nurse-Mix High ( $90 < \% RN$ )                                      | 64,231 (85.70%)                      | 64,231 (85.70%)                          | 47,079 (62.82%)                           | 258,558 (57.05%)                       | 0.67                   | <.0001               | 0.53                  | <.0001              |
| Nurse-Mix Moderate ( $75 \leq \% RN \leq 90$ )                       | 8,253 (11.01%)                       | 8,253 (11.01%)                           | 20,603 (27.49%)                           | 133,159 (29.38%)                       | -0.47                  | <.0001               | -0.42                 | <.0001              |
| Nurse-Mix Low ( $\% RN < 75$ )                                       | 2,097 (2.80%)                        | 2,097 (2.80%)                            | 6,074 (8.10%)                             | 56,068 (12.37%)                        | -0.37                  | <.0001               | -0.20                 | <.0001              |

| <b>Variable</b>          | <b>All Major Teaching Cases</b><br>N=74,947 | <b>Matched Major Teaching Cases</b><br>N=74,947 | <b>Matched Non-Teaching Controls</b><br>N=74,947 | <b>All Non-Teaching Controls</b><br>N=453,186 | <b>Std. Diff Before Match</b> | <b>P-value Before Match</b> | <b>Std. Diff After Match</b> | <b>P-value After Match</b> |
|--------------------------|---------------------------------------------|-------------------------------------------------|--------------------------------------------------|-----------------------------------------------|-------------------------------|-----------------------------|------------------------------|----------------------------|
| Nurse-Mix Missing        | 366 (0.49%)                                 | 366 (0.49%)                                     | 1,191 (1.59%)                                    | 5,401 (1.19%)                                 | -0.08                         | <.0001                      | -0.12                        | <.0001                     |
| High Technology Hospital | 43,558 (58.12%)                             | 43,558 (58.12%)                                 | 14,039 (18.90%)                                  | 94,622 (21.02%)                               | 0.82                          | <.0001                      | 0.87                         | <.0001                     |
| Dual-Eligible            | 17,610 (23.50%)                             | 17,610 (23.50%)                                 | 16,517 (22.04%)                                  | 100,956 (22.28%)                              | 0.03                          | <.0001                      | 0.03                         | <.0001                     |

“--” indicates a blank cell.

**Appendix Table 10. Readmission Results using alternative definitions of readmission, with and without the compound definition of readmission and death.** Method A is a paired analysis starting at admission. Method B is a paired analysis starting at discharge. Method C is a grouped analysis. Subscript 1 denotes the compound outcome or readmission and death, Subscript 2 denotes the outcome of just readmission.

| Outcome<br>(% unless noted)                                          | Cohort        | AMI<br>N=43,990<br>Pairs                                | HF<br>N=84,985<br>Pairs                               | PNA<br>N=74,947<br>Pairs                               | Combined<br>Patients<br>N=203,922<br>Pairs                                 | Combined Quintiles of Risk on Admission (Q1 = Lowest)  |                                                       |                                                       |                                                       |                                                       |
|----------------------------------------------------------------------|---------------|---------------------------------------------------------|-------------------------------------------------------|--------------------------------------------------------|----------------------------------------------------------------------------|--------------------------------------------------------|-------------------------------------------------------|-------------------------------------------------------|-------------------------------------------------------|-------------------------------------------------------|
|                                                                      |               |                                                         |                                                       |                                                        |                                                                            | Q1<br>N=41,851<br>Pairs                                | Q2<br>N=39,207<br>Pairs                               | Q3<br>N=39,738<br>Pairs                               | Q4<br>N=40,547<br>Pairs                               | Q5<br>N=42,579<br>Pairs                               |
| 30-day<br>Readmission or<br>Death (%)<br><b>METHOD A<sub>1</sub></b> | Teaching      | 32.9                                                    | 29.5                                                  | 30.0                                                   | 30.4                                                                       | 20.9                                                   | 25.0                                                  | 28.2                                                  | 33.3                                                  | 44.1                                                  |
|                                                                      | Nonteaching   | 36.2                                                    | 30.9                                                  | 31.6                                                   | 32.3                                                                       | 23.6                                                   | 27.1                                                  | 29.9                                                  | 34.8                                                  | 45.5                                                  |
|                                                                      | Difference    | -3.3 <sup>d</sup>                                       | -1.4 <sup>d</sup>                                     | -1.6 <sup>d</sup>                                      | -1.9 <sup>d</sup>                                                          | -2.8 <sup>d</sup>                                      | -2.1 <sup>d</sup>                                     | -1.7 <sup>d</sup>                                     | -1.5 <sup>d</sup>                                     | -1.4 <sup>d</sup>                                     |
| 30-day<br>Readmission (%)<br><b>METHOD A<sub>2</sub></b>             | Teaching      | 22.4                                                    | 23.1                                                  | 19.4                                                   | 21.6                                                                       | 19.1                                                   | 21.5                                                  | 22.1                                                  | 22.6                                                  | 22.6                                                  |
|                                                                      | Nonteaching   | 25.2                                                    | 23.8                                                  | 19.5                                                   | 22.5                                                                       | 22.0                                                   | 23.4                                                  | 23.2                                                  | 22.8                                                  | 21.5                                                  |
|                                                                      | Difference    | -2.9 <sup>d</sup>                                       | -0.7 <sup>c</sup>                                     | -0.1                                                   | -1.0 <sup>d</sup>                                                          | -2.9 <sup>d</sup>                                      | -1.9 <sup>d</sup>                                     | -1.1 <sup>d</sup>                                     | -0.1                                                  | 1.2 <sup>d</sup>                                      |
| <b>N Pairs for<br/>METHOD B</b>                                      | <b>Cohort</b> | <b>AMI</b><br>N=37,878<br>Pairs                         | <b>HF</b><br>N=79,921<br>Pairs                        | <b>PNA</b><br>N=67,340<br>Pairs                        | <b>Combined<br/>Patients</b><br>N=185,139<br>Pairs                         | <b>Q1</b><br>N=40,885<br>Pairs                         | <b>Q2</b><br>N=37,472<br>Pairs                        | <b>Q3</b><br>N=36,837<br>Pairs                        | <b>Q4</b><br>N=35,955<br>Pairs                        | <b>Q5</b><br>N=33,990<br>Pairs                        |
| 30-day<br>Readmission or<br>Death (%)<br><b>METHOD B<sub>1</sub></b> | Teaching      | 27.1                                                    | 27.4                                                  | 25.9                                                   | 26.8                                                                       | 19.9                                                   | 23.3                                                  | 25.4                                                  | 29.3                                                  | 37.6                                                  |
|                                                                      | Nonteaching   | 31.1                                                    | 28.7                                                  | 27.3                                                   | 28.7                                                                       | 22.8                                                   | 25.5                                                  | 27.2                                                  | 30.6                                                  | 38.8                                                  |
|                                                                      | Difference    | -4.0 <sup>d</sup>                                       | -1.3 <sup>d</sup>                                     | -1.4 <sup>d</sup>                                      | -1.9 <sup>d</sup>                                                          | -2.8 <sup>d</sup>                                      | -2.2 <sup>d</sup>                                     | -1.8 <sup>d</sup>                                     | -1.3 <sup>d</sup>                                     | -1.2 <sup>c</sup>                                     |
| 30-day<br>Readmission (%)<br><b>METHOD B<sub>2</sub></b>             | Teaching      | 24.0                                                    | 23.9                                                  | 20.2                                                   | 22.6                                                                       | 19.3                                                   | 22.1                                                  | 22.9                                                  | 24.0                                                  | 25.1                                                  |
|                                                                      | Nonteaching   | 27.2                                                    | 24.6                                                  | 20.5                                                   | 23.6                                                                       | 22.2                                                   | 23.9                                                  | 24.1                                                  | 24.2                                                  | 24.0                                                  |
|                                                                      | Difference    | -3.2 <sup>d</sup>                                       | -0.7 <sup>c</sup>                                     | -0.3                                                   | -1.1 <sup>d</sup>                                                          | -2.9 <sup>d</sup>                                      | -1.9 <sup>d</sup>                                     | -1.2 <sup>c</sup>                                     | -0.2                                                  | 1.1 <sup>b</sup>                                      |
| <b>N Patients for<br/>METHOD C</b>                                   | <b>Cohort</b> | <b>AMI</b><br>Case<br>N=40,673,<br>Control N=<br>40,803 | <b>HF</b><br>Case<br>N=82,836,<br>Control<br>N=82,388 | <b>PNA</b><br>Case<br>N=71,100,<br>Control<br>N=70,828 | <b>Combined<br/>Patients</b><br>Case<br>N=194,159,<br>Control<br>N=194,019 | <b>Q1</b><br>Case<br>N=41,341<br>, Control<br>N=41,388 | <b>Q2</b><br>Case<br>N=38,316,<br>Control<br>N=38,342 | <b>Q3</b><br>Case<br>N=38,234,<br>Control<br>N=38,262 | <b>Q4</b><br>Case<br>N=38,186,<br>Control<br>N=38,113 | <b>Q5</b><br>Case<br>N=38,082,<br>Control<br>N=37,914 |
| 30-day<br>Readmission or<br>Death (%)<br><b>METHOD C<sub>1</sub></b> | Teaching      | 27.5                                                    | 27.4                                                  | 26.3                                                   | 27.0                                                                       | 20.0                                                   | 23.3                                                  | 25.5                                                  | 29.3                                                  | 37.8                                                  |
|                                                                      | Nonteaching   | 31.3                                                    | 28.8                                                  | 27.7                                                   | 28.9                                                                       | 22.8                                                   | 25.5                                                  | 27.2                                                  | 30.7                                                  | 38.9                                                  |
|                                                                      | Difference    | -3.8 <sup>d</sup>                                       | -1.4 <sup>d</sup>                                     | -1.4 <sup>d</sup>                                      | -1.9 <sup>d</sup>                                                          | -2.8 <sup>d</sup>                                      | -2.2 <sup>d</sup>                                     | -1.7 <sup>d</sup>                                     | -1.4 <sup>d</sup>                                     | -1.1 <sup>b</sup>                                     |
| 30-day<br>Readmission (%)<br><b>METHOD C<sub>2</sub></b>             | Teaching      | 24.2                                                    | 23.8                                                  | 20.4                                                   | 22.7                                                                       | 19.3                                                   | 22.0                                                  | 23.0                                                  | 24.0                                                  | 25.3                                                  |
|                                                                      | Nonteaching   | 27.2                                                    | 24.6                                                  | 20.7                                                   | 23.7                                                                       | 22.2                                                   | 24.0                                                  | 24.1                                                  | 24.2                                                  | 24.1                                                  |
|                                                                      | Difference    | -3.0 <sup>d</sup>                                       | -0.8 <sup>c</sup>                                     | -0.3                                                   | -1.0 <sup>d</sup>                                                          | -2.9 <sup>d</sup>                                      | -2.0 <sup>d</sup>                                     | -1.1 <sup>c</sup>                                     | -0.2                                                  | 1.2 <sup>c</sup>                                      |

P-value key: a: P < 0.05; b: P < 0.01; c: P < 0.001; d: P < 0.0001. Non-significant differences have no letter.

**METHOD A:** Paired analysis starts with patients on admission. **METHOD B:** Paired analysis starts only with patients who were discharged alive. If any member of the pair died before discharge, the entire pair is dropped from the analysis. **METHOD C:** Unpaired Analysis

**Appendix Table 11. Results for Combined Medical Conditions** See Appendix Table 6 for detailed descriptions of each of the payment definitions.

| Outcome<br>(% unless noted)                                         | Cohort                | All Patients<br>N=203,922<br>Pairs | Quintiles of Risk on Admission (Q1 = Lowest) |                         |                         |                         |                         | Trend<br>P-value* |
|---------------------------------------------------------------------|-----------------------|------------------------------------|----------------------------------------------|-------------------------|-------------------------|-------------------------|-------------------------|-------------------|
|                                                                     |                       |                                    | Q1<br>N=41,851<br>Pairs                      | Q2<br>N=39,207<br>Pairs | Q3<br>N=39,738<br>Pairs | Q4<br>N=40,547<br>Pairs | Q5<br>N=42,579<br>Pairs |                   |
|                                                                     | % of Pairs            | 100%                               | 20.5%                                        | 19.2%                   | 19.5%                   | 19.9%                   | 20.9%                   |                   |
| 30-Day Mortality (%)                                                | Teach. Hosp. Patients | 10.7%                              | 2.5%                                         | 4.8%                    | 7.9%                    | 13.1%                   | 24.6%                   | 0.0001            |
|                                                                     | Nonteaching Controls  | 12.0%                              | 2.6%                                         | 5.4%                    | 8.9%                    | 14.9%                   | 27.6%                   |                   |
|                                                                     | Difference in Outcome | -1.3%                              | -0.1%                                        | -0.6%                   | -0.9%                   | -1.8%                   | -3.0%                   |                   |
|                                                                     | P-value               | <.0001                             | 0.4670                                       | 0.0001                  | <.0001                  | <.0001                  | <.0001                  |                   |
| ICU or Intermediate<br>Care Use (%)                                 | Teach. Hosp. Patients | 45.7%                              | 42.8%                                        | 45.2%                   | 45.1%                   | 46.4%                   | 48.8%                   | 0.0443            |
|                                                                     | Nonteaching Controls  | 50.9%                              | 49.9%                                        | 50.9%                   | 50.1%                   | 50.6%                   | 52.8%                   |                   |
|                                                                     | Difference in Outcome | -5.2%                              | -7.1%                                        | -5.7%                   | -4.9%                   | -4.3%                   | -4.0%                   |                   |
|                                                                     | P-value               | <.0001                             | <.0001                                       | <.0001                  | <.0001                  | <.0001                  | <.0001                  |                   |
| ICU Use (%)                                                         | Teach. Hosp. Patients | 19.9%                              | 16.6%                                        | 19.6%                   | 19.8%                   | 20.7%                   | 22.7%                   | 0.0921            |
|                                                                     | Nonteaching Controls  | 22.4%                              | 18.6%                                        | 22.3%                   | 22.5%                   | 23.0%                   | 25.3%                   |                   |
|                                                                     | Difference in Outcome | -2.5%                              | -2.0%                                        | -2.7%                   | -2.7%                   | -2.3%                   | -2.6%                   |                   |
|                                                                     | P-value               | <.0001                             | <.0001                                       | <.0001                  | <.0001                  | <.0001                  | <.0001                  |                   |
| 30-day Readmission<br>or Death (%)                                  | Teach. Hosp. Patients | 30.4%                              | 20.9%                                        | 25.0%                   | 28.2%                   | 33.3%                   | 44.1%                   | 0.0003            |
|                                                                     | Nonteaching Controls  | 32.3%                              | 23.6%                                        | 27.1%                   | 29.9%                   | 34.8%                   | 45.5%                   |                   |
|                                                                     | Difference in Outcome | -1.9%                              | -2.8%                                        | -2.1%                   | -1.7%                   | -1.5%                   | -1.4%                   |                   |
|                                                                     | P-value               | <.0001                             | <.0001                                       | <.0001                  | <.0001                  | <.0001                  | <.0001                  |                   |
| Length of Stay<br>(days, m-estimate)                                | Teach. Hosp. Patients | 5.5                                | 4.5                                          | 5.0                     | 5.4                     | 5.9                     | 6.8                     | 0.6208            |
|                                                                     | Nonteaching Controls  | 5.1                                | 4.1                                          | 4.6                     | 4.9                     | 5.4                     | 6.3                     |                   |
|                                                                     | Difference in Outcome | 0.4                                | 0.4                                          | 0.4                     | 0.4                     | 0.4                     | 0.5                     |                   |
|                                                                     | P-value               | <.0001                             | <.0001                                       | <.0001                  | <.0001                  | <.0001                  | <.0001                  |                   |
| 30-day Resource<br>Cost<br>(\$, m-estimate)                         | Teach. Hosp. Patients | 19,249                             | 16,464                                       | 18,378                  | 19,041                  | 20,051                  | 22,265                  | <.0001            |
|                                                                     | Nonteaching Controls  | 18,944                             | 17,000                                       | 18,489                  | 18,848                  | 19,450                  | 20,901                  |                   |
|                                                                     | Difference in Outcome | 273                                | -546                                         | -140                    | 182                     | 557                     | 1,289                   |                   |
|                                                                     | P-value               | <.0001                             | <.0001                                       | 0.2904                  | 0.1643                  | <.0001                  | <.0001                  |                   |
| 30-day Payments<br>Total (\$, m-estimate)                           | Teach. Hosp. Patients | 22,304                             | 21,075                                       | 22,125                  | 21,863                  | 22,490                  | 23,913                  | <.0001            |
|                                                                     | Nonteaching Controls  | 17,141                             | 16,703                                       | 17,420                  | 17,044                  | 16,899                  | 17,624                  |                   |
|                                                                     | Difference in Outcome | 5,048                              | 4,277                                        | 4,629                   | 4,715                   | 5,431                   | 6,120                   |                   |
|                                                                     | P-value               | <.0001                             | <.0001                                       | <.0001                  | <.0001                  | <.0001                  | <.0001                  |                   |
| 30-day Payments<br>Without Geography<br>(\$, m-estimate)            | Teach. Hosp. Patients | 21,923                             | 20,788                                       | 21,788                  | 21,490                  | 22,075                  | 23,443                  | <.0001            |
|                                                                     | Nonteaching Controls  | 17,166                             | 16,779                                       | 17,476                  | 17,077                  | 16,904                  | 17,593                  |                   |
|                                                                     | Difference in Outcome | 4,651                              | 3,915                                        | 4,242                   | 4,316                   | 5,024                   | 5,694                   |                   |
|                                                                     | P-value               | <.0001                             | <.0001                                       | <.0001                  | <.0001                  | <.0001                  | <.0001                  |                   |
| 30-day Payments<br>Without IME<br>(\$, m-estimate)                  | Teach. Hosp. Patients | 19,821                             | 18,703                                       | 19,669                  | 19,439                  | 19,991                  | 21,265                  | <.0001            |
|                                                                     | Nonteaching Controls  | 16,898                             | 16,423                                       | 17,113                  | 16,794                  | 16,694                  | 17,449                  |                   |
|                                                                     | Difference in Outcome | 2,858                              | 2,237                                        | 2,505                   | 2,593                   | 3,192                   | 3,713                   |                   |
|                                                                     | P-value               | <.0001                             | <.0001                                       | <.0001                  | <.0001                  | <.0001                  | <.0001                  |                   |
| 30-day Payments<br>Without DSH<br>(\$, m-estimate)                  | Teach. Hosp. Patients | 20,888                             | 19,623                                       | 20,737                  | 20,493                  | 21,089                  | 22,447                  | <.0001            |
|                                                                     | Nonteaching Controls  | 16,455                             | 15,986                                       | 16,725                  | 16,382                  | 16,247                  | 16,926                  |                   |
|                                                                     | Difference in Outcome | 4,332                              | 3,566                                        | 3,942                   | 4,028                   | 4,708                   | 5,360                   |                   |
|                                                                     | P-value               | <.0001                             | <.0001                                       | <.0001                  | <.0001                  | <.0001                  | <.0001                  |                   |
| 30-day Payments<br>Without Geography<br>or IME (\$, m-<br>estimate) | Teach. Hosp. Patients | 19,450                             | 18,416                                       | 19,327                  | 19,067                  | 19,584                  | 20,810                  | <.0001            |
|                                                                     | Nonteaching Controls  | 16,923                             | 16,497                                       | 17,164                  | 16,834                  | 16,694                  | 17,415                  |                   |
|                                                                     | Difference in Outcome | 2,468                              | 1,880                                        | 2,126                   | 2,198                   | 2,791                   | 3,295                   |                   |
|                                                                     | P-value               | <.0001                             | <.0001                                       | <.0001                  | <.0001                  | <.0001                  | <.0001                  |                   |
| 30-day Payments<br>Without Geography<br>or DSH (\$, m-<br>estimate) | Teach. Hosp. Patients | 20,515                             | 19,335                                       | 20,395                  | 20,125                  | 20,685                  | 21,981                  | <.0001            |
|                                                                     | Nonteaching Controls  | 16,476                             | 16,056                                       | 16,777                  | 16,413                  | 16,254                  | 16,896                  |                   |
|                                                                     | Difference in Outcome | 3,938                              | 3,205                                        | 3,557                   | 3,631                   | 4,306                   | 4,937                   |                   |
|                                                                     | P-value               | <.0001                             | <.0001                                       | <.0001                  | <.0001                  | <.0001                  | <.0001                  |                   |
|                                                                     | Teach. Hosp. Patients | 17,902                             | 16,855                                       | 17,786                  | 17,587                  | 18,045                  | 19,197                  | <.0001            |
|                                                                     | Nonteaching Controls  | 16,207                             | 15,746                                       | 16,431                  | 16,145                  | 16,001                  | 16,671                  |                   |

| Outcome<br>(% unless noted)                                     | Cohort                | All Patients<br>N=203,922<br>Pairs | Quintiles of Risk on Admission (Q1 = Lowest) |                         |                         |                         |                         | Trend<br>P-value* |
|-----------------------------------------------------------------|-----------------------|------------------------------------|----------------------------------------------|-------------------------|-------------------------|-------------------------|-------------------------|-------------------|
|                                                                 |                       |                                    | Q1<br>N=41,851<br>Pairs                      | Q2<br>N=39,207<br>Pairs | Q3<br>N=39,738<br>Pairs | Q4<br>N=40,547<br>Pairs | Q5<br>N=42,579<br>Pairs |                   |
| 30-day Payments<br>Without Geo, IME, or<br>DSH (\$, m-estimate) | Difference in Outcome | 1,662                              | 1,086                                        | 1,349                   | 1,420                   | 1,972                   | 2,440                   |                   |
|                                                                 | P-value               | <.0001                             | <.0001                                       | <.0001                  | <.0001                  | <.0001                  | <.0001                  |                   |

P-values for binary outcomes overall and within strata were calculated using McNemar's test. P-values and estimates for continuous outcomes overall and within strata were calculated using M-statistics.

\*Trends for binary outcomes were tested using the Mantel test for trend, while trends for continuous outcomes were tested using robust regression.

**Appendix Table 11a. Results for Matched AMI Pairs** See Appendix Table 6 for detailed descriptions of each of the payment definitions.

| Outcome<br>(% unless noted)                                         | Cohort                | All<br>Patients<br>N=43,990<br>Pairs | Quintiles of Risk on Admission (Q1 = Lowest) |                        |                        |                        |                        | Trend<br>P-value* |
|---------------------------------------------------------------------|-----------------------|--------------------------------------|----------------------------------------------|------------------------|------------------------|------------------------|------------------------|-------------------|
|                                                                     |                       |                                      | Q1<br>N=7,908<br>Pairs                       | Q2<br>N=8,516<br>Pairs | Q3<br>N=8,650<br>Pairs | Q4<br>N=9,273<br>Pairs | Q5<br>N=9,643<br>Pairs |                   |
|                                                                     | % of Pairs            | 100.0%                               | 18.0%                                        | 19.4%                  | 19.7%                  | 21.1%                  | 21.9%                  |                   |
| 30-Day Mortality (%)                                                | Teach. Hosp. Patients | 12.1%                                | 2.8%                                         | 5.3%                   | 8.6%                   | 14.4%                  | 26.5%                  | 0.0014            |
|                                                                     | Nonteaching Controls  | 12.9%                                | 2.9%                                         | 5.5%                   | 9.5%                   | 15.2%                  | 28.6%                  |                   |
|                                                                     | Difference in Outcome | -0.9%                                | -0.1%                                        | -0.2%                  | -0.8%                  | -0.9%                  | -2.1%                  |                   |
|                                                                     | P-value               | <.0001                               | 0.8481                                       | 0.4762                 | 0.0518                 | 0.1003                 | 0.0009                 |                   |
| ICU or Stepdown<br>Use (%)                                          | Teach. Hosp. Patients | 70.0%                                | 65.8%                                        | 71.6%                  | 71.5%                  | 70.6%                  | 70.1%                  | 0.0012            |
|                                                                     | Nonteaching Controls  | 75.3%                                | 73.1%                                        | 76.9%                  | 76.9%                  | 74.9%                  | 74.5%                  |                   |
|                                                                     | Difference in Outcome | -5.3%                                | -7.3%                                        | -5.3%                  | -5.4%                  | -4.3%                  | -4.4%                  |                   |
|                                                                     | P-value               | <.0001                               | <.0001                                       | <.0001                 | <.0001                 | <.0001                 | <.0001                 |                   |
| ICU Use (%)                                                         | Teach. Hosp. Patients | 46.8%                                | 39.1%                                        | 49.0%                  | 49.2%                  | 47.9%                  | 48.0%                  | 0.0176            |
|                                                                     | Nonteaching Controls  | 48.7%                                | 42.4%                                        | 50.8%                  | 51.9%                  | 49.1%                  | 48.9%                  |                   |
|                                                                     | Difference in Outcome | -2.0%                                | -3.4%                                        | -1.8%                  | -2.6%                  | -1.2%                  | -1.0%                  |                   |
|                                                                     | P-value               | <.0001                               | <.0001                                       | 0.0128                 | 0.0002                 | 0.0663                 | 0.1333                 |                   |
| 30-day Readmission<br>or Death (%)                                  | Teach. Hosp. Patients | 32.9%                                | 21.4%                                        | 26.0%                  | 30.3%                  | 37.0%                  | 46.7%                  | < .0001           |
|                                                                     | Nonteaching Controls  | 36.2%                                | 27.3%                                        | 31.3%                  | 34.1%                  | 38.1%                  | 47.9%                  |                   |
|                                                                     | Difference in Outcome | -3.3%                                | -5.9%                                        | -5.3%                  | -3.8%                  | -1.1%                  | -1.2%                  |                   |
|                                                                     | P-value               | <.0001                               | <.0001                                       | <.0001                 | <.0001                 | 0.1287                 | 0.0906                 |                   |
| Length of Stay<br>(days, m-estimate)                                | Teach. Hosp. Patients | 5.3                                  | 4.0                                          | 4.8                    | 5.3                    | 5.9                    | 6.5                    | 0.6979            |
|                                                                     | Nonteaching Controls  | 4.6                                  | 3.5                                          | 4.1                    | 4.6                    | 5.0                    | 5.6                    |                   |
|                                                                     | Difference in Outcome | 0.7                                  | 0.5                                          | 0.6                    | 0.7                    | 0.9                    | 0.9                    |                   |
|                                                                     | P-value               | < .0001                              | < .0001                                      | < .0001                | < .0001                | < .0001                | < .0001                |                   |
| 30-day Resource<br>Cost<br>(\$, m-estimate)                         | Teach. Hosp. Patients | 23,875                               | 19,339                                       | 23,144                 | 24,614                 | 25,543                 | 26,154                 | <.0001            |
|                                                                     | Nonteaching Controls  | 23,327                               | 20,426                                       | 23,744                 | 24,493                 | 23,946                 | 23,815                 |                   |
|                                                                     | Difference in Outcome | 489                                  | -1,060                                       | -581                   | 110                    | 1,438                  | 2,222                  |                   |
|                                                                     | P-value               | 0.0013                               | 0.0005                                       | 0.0943                 | 0.7569                 | <.0001                 | <.0001                 |                   |
| 30-day Payments<br>Total (\$, m-estimate)                           | Teach. Hosp. Patients | 29,930                               | 28,325                                       | 30,824                 | 30,675                 | 30,496                 | 29,390                 | < .0001           |
|                                                                     | Nonteaching Controls  | 24,060                               | 24,418                                       | 26,055                 | 25,583                 | 23,054                 | 21,544                 |                   |
|                                                                     | Difference in Outcome | 5,795                                | 3,800                                        | 4,780                  | 5,019                  | 7,241                  | 7,681                  |                   |
|                                                                     | P-value               | < .0001                              | < .0001                                      | < .0001                | < .0001                | < .0001                | < .0001                |                   |
| 30-day Payments<br>Without Geography<br>(\$, m-estimate)            | Teach. Hosp. Patients | 29,403                               | 27,954                                       | 30,323                 | 30,106                 | 29,905                 | 28,778                 | <.0001            |
|                                                                     | Nonteaching Controls  | 24,124                               | 24,541                                       | 26,155                 | 25,646                 | 23,088                 | 21,519                 |                   |
|                                                                     | Difference in Outcome | 5,218                                | 3,307                                        | 4,185                  | 4,422                  | 6,628                  | 7,090                  |                   |
|                                                                     | P-value               | <.0001                               | <.0001                                       | <.0001                 | <.0001                 | <.0001                 | <.0001                 |                   |
| 30-day Payments<br>Without IME<br>(\$, m-estimate)                  | Teach. Hosp. Patients | 26,446                               | 24,989                                       | 27,226                 | 27,072                 | 26,900                 | 26,023                 | < .0001           |
|                                                                     | Nonteaching Controls  | 23,416                               | 23,635                                       | 25,281                 | 24,915                 | 22,497                 | 21,148                 |                   |
|                                                                     | Difference in Outcome | 2,966                                | 1,296                                        | 1,979                  | 2,160                  | 4,254                  | 4,723                  |                   |
|                                                                     | P-value               | < .0001                              | < .0001                                      | < .0001                | < .0001                | < .0001                | < .0001                |                   |
| 30-day Payments<br>Without DSH<br>(\$, m-estimate)                  | Teach. Hosp. Patients | 27,975                               | 26,398                                       | 28,817                 | 28,718                 | 28,494                 | 27,440                 | < .0001           |
|                                                                     | Nonteaching Controls  | 23,035                               | 23,363                                       | 24,979                 | 24,535                 | 22,132                 | 20,639                 |                   |
|                                                                     | Difference in Outcome | 4,865                                | 2,965                                        | 3,892                  | 4,130                  | 6,241                  | 6,673                  |                   |
|                                                                     | P-value               | < .0001                              | < .0001                                      | < .0001                | < .0001                | < .0001                | < .0001                |                   |
| 30-day Payments<br>Without Geography<br>or IME (\$, m-<br>estimate) | Teach. Hosp. Patients | 25,936                               | 24,626                                       | 26,730                 | 26,553                 | 26,333                 | 25,423                 | <.0001            |
|                                                                     | Nonteaching Controls  | 23,476                               | 23,787                                       | 25,377                 | 24,969                 | 22,520                 | 21,151                 |                   |
|                                                                     | Difference in Outcome | 2,403                                | 813                                          | 1,396                  | 1,578                  | 3,675                  | 4,144                  |                   |
|                                                                     | P-value               | <.0001                               | 0.0070                                       | <.0001                 | <.0001                 | <.0001                 | <.0001                 |                   |
| 30-day Payments<br>Without Geography<br>or DSH (\$, m-<br>estimate) | Teach. Hosp. Patients | 27,450                               | 26,028                                       | 28,311                 | 28,177                 | 27,903                 | 26,833                 | <.0001            |
|                                                                     | Nonteaching Controls  | 23,099                               | 23,496                                       | 25,073                 | 24,583                 | 22,152                 | 20,622                 |                   |
|                                                                     | Difference in Outcome | 4,295                                | 2,474                                        | 3,301                  | 3,539                  | 5,643                  | 6,085                  |                   |
|                                                                     | P-value               | <.0001                               | <.0001                                       | <.0001                 | <.0001                 | <.0001                 | <.0001                 |                   |
|                                                                     | Teach. Hosp. Patients | 23,784                               | 22,559                                       | 24,556                 | 24,403                 | 24,210                 | 23,277                 | <.0001            |
|                                                                     | Nonteaching Controls  | 22,437                               | 22,698                                       | 24,222                 | 23,860                 | 21,582                 | 20,193                 |                   |

| Outcome<br>(% unless noted)                                     | Cohort                           | All<br>Patients<br>N=43,990<br>Pairs | Quintiles of Risk on Admission (Q1 = Lowest) |                        |                        |                        |                        | Trend<br>P-value* |
|-----------------------------------------------------------------|----------------------------------|--------------------------------------|----------------------------------------------|------------------------|------------------------|------------------------|------------------------|-------------------|
|                                                                 |                                  |                                      | Q1<br>N=7,908<br>Pairs                       | Q2<br>N=8,516<br>Pairs | Q3<br>N=8,650<br>Pairs | Q4<br>N=9,273<br>Pairs | Q5<br>N=9,643<br>Pairs |                   |
| 30-day Payments<br>Without Geo, IME, or<br>DSH (\$, m-estimate) | Difference in Outcome<br>P-value | 1,332<br><.0001                      | -145<br>0.6052                               | 359<br>0.2353          | 551<br>0.0656          | 2,520<br><.0001        | 2,981<br><.0001        |                   |

P-values for binary outcomes overall and within strata were calculated using McNemar's test. P-values and estimates for continuous outcomes overall and within strata were calculated using M-statistics.  
\*Trends for binary outcomes were tested using the Mantel test for trend, while trends for continuous outcomes were tested using robust regression.

**Appendix Table 11b. Results for Matched HF Pairs** See Appendix Table 6 for detailed descriptions of each of the payment definitions.

| Outcome<br>(% unless noted)                                         | Cohort                | All Patients<br>N=84,985<br>Pairs | Quintiles of Risk on Admission (Q1 = Lowest) |                         |                         |                         |                         | Trend<br>P-<br>value* |
|---------------------------------------------------------------------|-----------------------|-----------------------------------|----------------------------------------------|-------------------------|-------------------------|-------------------------|-------------------------|-----------------------|
|                                                                     |                       |                                   | Q1<br>N=19,968<br>Pairs                      | Q2<br>N=16,803<br>Pairs | Q3<br>N=16,184<br>Pairs | Q4<br>N=15,995<br>Pairs | Q5<br>N=16,035<br>Pairs |                       |
|                                                                     | % of Pairs            | 100.0%                            | 23.5%                                        | 19.8%                   | 19.0%                   | 18.8%                   | 18.9%                   |                       |
| 30-Day Mortality (%)                                                | Teach. Hosp. Patients | 8.3%                              | 2.5%                                         | 4.5%                    | 7.0%                    | 10.4%                   | 18.7%                   | <.0001                |
|                                                                     | Nonteaching Controls  | 9.3%                              | 2.6%                                         | 5.1%                    | 7.4%                    | 12.0%                   | 21.4%                   |                       |
|                                                                     | Difference in Outcome | -1.0%                             | -0.1%                                        | -0.6%                   | -0.5%                   | -1.6%                   | -2.6%                   |                       |
|                                                                     | P-value               | <.0001                            | 0.3913                                       | 0.0097                  | 0.0941                  | <.0001                  | <.0001                  |                       |
| ICU or Stepdown<br>Use (%)                                          | Teach. Hosp. Patients | 45.8%                             | 45.0%                                        | 45.5%                   | 45.2%                   | 46.3%                   | 47.3%                   | <.0001                |
|                                                                     | Nonteaching Controls  | 52.1%                             | 53.6%                                        | 52.4%                   | 51.3%                   | 51.1%                   | 51.5%                   |                       |
|                                                                     | Difference in Outcome | -6.3%                             | -8.6%                                        | -7.0%                   | -6.0%                   | -4.9%                   | -4.3%                   |                       |
|                                                                     | P-value               | <.0001                            | <.0001                                       | <.0001                  | <.0001                  | <.0001                  | <.0001                  |                       |
| ICU Use (%)                                                         | Teach. Hosp. Patients | 13.8%                             | 13.8%                                        | 13.5%                   | 12.9%                   | 13.5%                   | 15.1%                   | 0.0016                |
|                                                                     | Nonteaching Controls  | 16.1%                             | 14.7%                                        | 16.3%                   | 15.8%                   | 16.0%                   | 17.9%                   |                       |
|                                                                     | Difference in Outcome | -2.3%                             | -1.0%                                        | -2.9%                   | -2.8%                   | -2.5%                   | -2.8%                   |                       |
|                                                                     | P-value               | <.0001                            | 0.0062                                       | <.0001                  | <.0001                  | <.0001                  | <.0001                  |                       |
| 30-day Readmission<br>or Death (%)                                  | Teach. Hosp. Patients | 29.5%                             | 23.6%                                        | 26.6%                   | 28.7%                   | 31.3%                   | 39.1%                   | 0.0190                |
|                                                                     | Nonteaching Controls  | 30.9%                             | 25.8%                                        | 28.2%                   | 29.7%                   | 32.6%                   | 39.6%                   |                       |
|                                                                     | Difference in Outcome | -1.4%                             | -2.1%                                        | -1.6%                   | -1.0%                   | -1.3%                   | -0.5%                   |                       |
|                                                                     | P-value               | <.0001                            | <.0001                                       | 0.0009                  | 0.0573                  | 0.0102                  | 0.3451                  |                       |
| Length of Stay<br>(days, m-estimate)                                | Teach. Hosp. Patients | 5.5                               | 4.9                                          | 5.2                     | 5.4                     | 5.7                     | 6.5                     | 0.6020                |
|                                                                     | Nonteaching Controls  | 4.9                               | 4.2                                          | 4.6                     | 4.8                     | 5.1                     | 5.9                     |                       |
|                                                                     | Difference in Outcome | 0.6                               | 0.6                                          | 0.6                     | 0.6                     | 0.5                     | 0.6                     |                       |
|                                                                     | P-value               | <.0001                            | <.0001                                       | <.0001                  | <.0001                  | <.0001                  | <.0001                  |                       |
| 30-day Resource<br>Cost<br>(\$, m-estimate)                         | Teach. Hosp. Patients | 19,067                            | 17,755                                       | 18,862                  | 18,803                  | 19,281                  | 20,985                  | <.0001                |
|                                                                     | Nonteaching Controls  | 18,267                            | 17,587                                       | 18,318                  | 18,117                  | 18,249                  | 19,257                  |                       |
|                                                                     | Difference in Outcome | 756                               | 118                                          | 519                     | 689                     | 987                     | 1,623                   |                       |
|                                                                     | P-value               | <.0001                            | 0.5278                                       | 0.0112                  | 0.0006                  | <.0001                  | <.0001                  |                       |
| 30-day Payments<br>Total (\$, m-estimate)                           | Teach. Hosp. Patients | 21,017                            | 21,750                                       | 21,597                  | 20,388                  | 20,238                  | 20,883                  | 0.1944                |
|                                                                     | Nonteaching Controls  | 15,677                            | 16,467                                       | 16,284                  | 15,343                  | 14,953                  | 15,183                  |                       |
|                                                                     | Difference in Outcome | 5,206                             | 5,182                                        | 5,237                   | 4,923                   | 5,129                   | 5,526                   |                       |
|                                                                     | P-value               | <.0001                            | <.0001                                       | <.0001                  | <.0001                  | <.0001                  | <.0001                  |                       |
| 30-day Payments<br>Without Geography<br>(\$, m-estimate)            | Teach. Hosp. Patients | 20,682                            | 21,457                                       | 21,308                  | 20,060                  | 19,890                  | 20,528                  | 0.1532                |
|                                                                     | Nonteaching Controls  | 15,704                            | 16,523                                       | 16,321                  | 15,363                  | 14,950                  | 15,172                  |                       |
|                                                                     | Difference in Outcome | 4,858                             | 4,825                                        | 4,899                   | 4,577                   | 4,781                   | 5,176                   |                       |
|                                                                     | P-value               | <.0001                            | <.0001                                       | <.0001                  | <.0001                  | <.0001                  | <.0001                  |                       |
| 30-day Payments<br>Without IME<br>(\$, m-estimate)                  | Teach. Hosp. Patients | 18,734                            | 19,327                                       | 19,270                  | 18,207                  | 18,071                  | 18,693                  | 0.1300                |
|                                                                     | Nonteaching Controls  | 15,495                            | 16,215                                       | 16,038                  | 15,170                  | 14,824                  | 15,078                  |                       |
|                                                                     | Difference in Outcome | 3,151                             | 3,049                                        | 3,147                   | 2,954                   | 3,117                   | 3,488                   |                       |
|                                                                     | P-value               | <.0001                            | <.0001                                       | <.0001                  | <.0001                  | <.0001                  | <.0001                  |                       |
| 30-day Payments<br>Without DSH<br>(\$, m-estimate)                  | Teach. Hosp. Patients | 19,704                            | 20,216                                       | 20,281                  | 19,166                  | 19,029                  | 19,687                  | 0.0860                |
|                                                                     | Nonteaching Controls  | 15,067                            | 15,708                                       | 15,629                  | 14,769                  | 14,423                  | 14,660                  |                       |
|                                                                     | Difference in Outcome | 4,530                             | 4,408                                        | 4,556                   | 4,298                   | 4,480                   | 4,902                   |                       |
|                                                                     | P-value               | <.0001                            | <.0001                                       | <.0001                  | <.0001                  | <.0001                  | <.0001                  |                       |
| 30-day Payments<br>Without Geography<br>or IME (\$, m-<br>estimate) | Teach. Hosp. Patients | 18,413                            | 19,014                                       | 18,975                  | 17,883                  | 17,720                  | 18,327                  | 0.1167                |
|                                                                     | Nonteaching Controls  | 15,520                            | 16,278                                       | 16,091                  | 15,199                  | 14,813                  | 15,061                  |                       |
|                                                                     | Difference in Outcome | 2,813                             | 2,698                                        | 2,816                   | 2,616                   | 2,784                   | 3,145                   |                       |
|                                                                     | P-value               | <.0001                            | <.0001                                       | <.0001                  | <.0001                  | <.0001                  | <.0001                  |                       |
| 30-day Payments<br>Without Geography<br>or DSH (\$, m-<br>estimate) | Teach. Hosp. Patients | 19,385                            | 19,927                                       | 19,972                  | 18,844                  | 18,676                  | 19,323                  | 0.0636                |
|                                                                     | Nonteaching Controls  | 15,093                            | 15,786                                       | 15,666                  | 14,789                  | 14,414                  | 14,654                  |                       |
|                                                                     | Difference in Outcome | 4,186                             | 4,054                                        | 4,225                   | 3,954                   | 4,142                   | 4,556                   |                       |
|                                                                     | P-value               | <.0001                            | <.0001                                       | <.0001                  | <.0001                  | <.0001                  | <.0001                  |                       |
|                                                                     | Teach. Hosp. Patients | 16,984                            | 17,378                                       | 17,511                  | 16,555                  | 16,404                  | 16,989                  | 0.0253                |
|                                                                     | Nonteaching Controls  | 14,875                            | 15,524                                       | 15,415                  | 14,591                  | 14,238                  | 14,484                  |                       |



| Outcome<br>(% unless noted)                                     | Cohort                | All Patients<br>N=84,985<br>Pairs | Quintiles of Risk on Admission (Q1 = Lowest) |                         |                         |                         |                         | Trend<br>P-<br>value* |
|-----------------------------------------------------------------|-----------------------|-----------------------------------|----------------------------------------------|-------------------------|-------------------------|-------------------------|-------------------------|-----------------------|
|                                                                 |                       |                                   | Q1<br>N=19,968<br>Pairs                      | Q2<br>N=16,803<br>Pairs | Q3<br>N=16,184<br>Pairs | Q4<br>N=15,995<br>Pairs | Q5<br>N=16,035<br>Pairs |                       |
| 30-day Payments<br>Without Geo, IME, or<br>DSH (\$, m-estimate) | Difference in Outcome | 2,054                             | 1,837                                        | 2,058                   | 1,906                   | 2,058                   | 2,429                   |                       |
|                                                                 | P-value               | <.0001                            | <.0001                                       | <.0001                  | <.0001                  | <.0001                  | <.0001                  |                       |

P-values for binary outcomes overall and within strata were calculated using McNemar's test. P-values and estimates for continuous outcomes overall and within strata were calculated using M-statistics.

\*Trends for binary outcomes were tested using the Mantel test for trend, while trends for continuous outcomes were tested using robust regression.

**Appendix Table 11c. Results for Matched PNA Pairs** See Appendix Table 6 for detailed descriptions of each of the payment definitions.

| Outcome<br>(% unless noted)                                         | Cohort                | All Patients<br>N=74,947<br>Pairs | Quintiles of Risk on Admission (Q1 = Lowest) |                         |                         |                         |                         | Trend<br>P-<br>value* |
|---------------------------------------------------------------------|-----------------------|-----------------------------------|----------------------------------------------|-------------------------|-------------------------|-------------------------|-------------------------|-----------------------|
|                                                                     |                       |                                   | Q1<br>N=13,975<br>Pairs                      | Q2<br>N=13,888<br>Pairs | Q3<br>N=14,904<br>Pairs | Q4<br>N=15,279<br>Pairs | Q5<br>N=16,901<br>Pairs |                       |
|                                                                     | % of Pairs            | 100.0%                            | 18.6%                                        | 18.5%                   | 19.9%                   | 20.4%                   | 22.6%                   |                       |
| 30-Day Mortality (%)                                                | Teach. Hosp. Patients | 12.7%                             | 2.3%                                         | 4.7%                    | 8.5%                    | 15.1%                   | 29.2%                   | <.0001                |
|                                                                     | Nonteaching Controls  | 14.5%                             | 2.4%                                         | 5.5%                    | 10.0%                   | 17.6%                   | 33.1%                   |                       |
|                                                                     | Difference in Outcome | -1.8%                             | 0.0%                                         | -0.8%                   | -1.5%                   | -2.5%                   | -3.9%                   |                       |
|                                                                     | P-value               | <.0001                            | 0.9682                                       | 0.0029                  | <.0001                  | <.0001                  | <.0001                  |                       |
| ICU or Stepdown<br>Use (%)                                          | Teach. Hosp. Patients | 31.2%                             | 26.6%                                        | 28.5%                   | 29.7%                   | 31.8%                   | 38.1%                   | 0.0269                |
|                                                                     | Nonteaching Controls  | 35.2%                             | 31.5%                                        | 33.0%                   | 33.2%                   | 35.4%                   | 41.5%                   |                       |
|                                                                     | Difference in Outcome | -3.9%                             | -4.9%                                        | -4.4%                   | -3.4%                   | -3.6%                   | -3.4%                   |                       |
|                                                                     | P-value               | <.0001                            | <.0001                                       | <.0001                  | <.0001                  | <.0001                  | <.0001                  |                       |
| ICU Use (%)                                                         | Teach. Hosp. Patients | 11.1%                             | 8.0%                                         | 8.9%                    | 10.3%                   | 11.7%                   | 15.6%                   | 0.4840                |
|                                                                     | Nonteaching Controls  | 14.0%                             | 10.6%                                        | 12.1%                   | 12.9%                   | 14.5%                   | 18.8%                   |                       |
|                                                                     | Difference in Outcome | -2.9%                             | -2.6%                                        | -3.2%                   | -2.6%                   | -2.8%                   | -3.2%                   |                       |
|                                                                     | P-value               | <.0001                            | <.0001                                       | <.0001                  | <.0001                  | <.0001                  | <.0001                  |                       |
| 30-day Readmission<br>or Death (%)                                  | Teach. Hosp. Patients | 30.0%                             | 16.7%                                        | 22.5%                   | 26.4%                   | 33.3%                   | 47.3%                   | 0.2189                |
|                                                                     | Nonteaching Controls  | 31.6%                             | 18.5%                                        | 23.3%                   | 27.6%                   | 35.1%                   | 49.6%                   |                       |
|                                                                     | Difference in Outcome | -1.6%                             | -1.9%                                        | -0.8%                   | -1.2%                   | -1.8%                   | -2.3%                   |                       |
|                                                                     | P-value               | <.0001                            | <.0001                                       | 0.0907                  | 0.0177                  | 0.0008                  | <.0001                  |                       |
| Length of Stay<br>(days, m-estimate)                                | Teach. Hosp. Patients | 5.7                               | 4.4                                          | 5.0                     | 5.4                     | 6.0                     | 7.4                     | 0.0002                |
|                                                                     | Nonteaching Controls  | 5.6                               | 4.4                                          | 5.0                     | 5.3                     | 5.9                     | 7.0                     |                       |
|                                                                     | Difference in Outcome | 0.1                               | -0.1                                         | 0.0                     | 0.1                     | 0.1                     | 0.3                     |                       |
|                                                                     | P-value               | 0.0003                            | 0.2282                                       | 0.9933                  | 0.2469                  | 0.0926                  | <.0001                  |                       |
| 30-day Resource<br>Cost<br>(\$, m-estimate)                         | Teach. Hosp. Patients | 16,762                            | 13,005                                       | 14,862                  | 16,066                  | 17,627                  | 21,288                  | <.0001                |
|                                                                     | Nonteaching Controls  | 17,143                            | 14,220                                       | 15,476                  | 16,420                  | 18,001                  | 20,791                  |                       |
|                                                                     | Difference in Outcome | -382                              | -1,167                                       | -656                    | -323                    | -356                    | 453                     |                       |
|                                                                     | P-value               | <.0001                            | <.0001                                       | 0.0003                  | 0.0762                  | 0.0653                  | 0.0308                  |                       |
| 30-day Payments<br>Total (\$, m-estimate)                           | Teach. Hosp. Patients | 19,314                            | 16,117                                       | 17,479                  | 18,416                  | 20,046                  | 23,687                  | 0.0272                |
|                                                                     | Nonteaching Controls  | 14,789                            | 12,734                                       | 13,609                  | 14,017                  | 15,254                  | 17,752                  |                       |
|                                                                     | Difference in Outcome | 4,435                             | 3,314                                        | 3,828                   | 4,316                   | 4,690                   | 5,785                   |                       |
|                                                                     | P-value               | <.0001                            | <.0001                                       | <.0001                  | <.0001                  | <.0001                  | <.0001                  |                       |
| 30-day Payments<br>Without Geography<br>(\$, m-estimate)            | Teach. Hosp. Patients | 18,950                            | 15,854                                       | 17,166                  | 18,063                  | 19,673                  | 23,216                  | 0.0055                |
|                                                                     | Nonteaching Controls  | 14,787                            | 12,780                                       | 13,625                  | 14,038                  | 15,232                  | 17,681                  |                       |
|                                                                     | Difference in Outcome | 4,081                             | 3,009                                        | 3,498                   | 3,954                   | 4,329                   | 5,378                   |                       |
|                                                                     | P-value               | <.0001                            | <.0001                                       | <.0001                  | <.0001                  | <.0001                  | <.0001                  |                       |
| 30-day Payments<br>Without IME<br>(\$, m-estimate)                  | Teach. Hosp. Patients | 17,195                            | 14,359                                       | 15,566                  | 16,414                  | 17,856                  | 21,045                  | 0.0207                |
|                                                                     | Nonteaching Controls  | 14,690                            | 12,649                                       | 13,506                  | 13,923                  | 15,158                  | 17,622                  |                       |
|                                                                     | Difference in Outcome | 2,456                             | 1,674                                        | 2,046                   | 2,433                   | 2,630                   | 3,343                   |                       |
|                                                                     | P-value               | <.0001                            | <.0001                                       | <.0001                  | <.0001                  | <.0001                  | <.0001                  |                       |
| 30-day Payments<br>Without DSH<br>(\$, m-estimate)                  | Teach. Hosp. Patients | 18,069                            | 15,021                                       | 16,351                  | 17,233                  | 18,785                  | 22,198                  | 0.0031                |
|                                                                     | Nonteaching Controls  | 14,206                            | 12,210                                       | 13,080                  | 13,476                  | 14,647                  | 17,027                  |                       |
|                                                                     | Difference in Outcome | 3,796                             | 2,751                                        | 3,251                   | 3,666                   | 4,036                   | 5,051                   |                       |
|                                                                     | P-value               | <.0001                            | <.0001                                       | <.0001                  | <.0001                  | <.0001                  | <.0001                  |                       |
| 30-day Payments<br>Without Geography<br>or IME (\$, m-<br>estimate) | Teach. Hosp. Patients | 16,841                            | 14,105                                       | 15,261                  | 16,067                  | 17,488                  | 20,594                  | 0.0041                |
|                                                                     | Nonteaching Controls  | 14,687                            | 12,692                                       | 13,528                  | 13,951                  | 15,143                  | 17,555                  |                       |
|                                                                     | Difference in Outcome | 2,109                             | 1,374                                        | 1,724                   | 2,082                   | 2,276                   | 2,943                   |                       |
|                                                                     | P-value               | <.0001                            | <.0001                                       | <.0001                  | <.0001                  | <.0001                  | <.0001                  |                       |
| 30-day Payments<br>Without Geography<br>or DSH (\$, m-<br>estimate) | Teach. Hosp. Patients | 17,709                            | 14,753                                       | 16,045                  | 16,883                  | 18,416                  | 21,738                  | 0.0003                |
|                                                                     | Nonteaching Controls  | 14,206                            | 12,246                                       | 13,100                  | 13,505                  | 14,637                  | 16,962                  |                       |
|                                                                     | Difference in Outcome | 3,443                             | 2,446                                        | 2,925                   | 3,305                   | 3,677                   | 4,646                   |                       |
|                                                                     | P-value               | <.0001                            | <.0001                                       | <.0001                  | <.0001                  | <.0001                  | <.0001                  |                       |
|                                                                     | Teach. Hosp. Patients | 15,503                            | 12,939                                       | 14,044                  | 14,782                  | 16,121                  | 19,003                  | <.0001                |
|                                                                     | Nonteaching Controls  | 14,073                            | 12,141                                       | 12,971                  | 13,387                  | 14,511                  | 16,790                  |                       |

| Outcome<br>(% unless noted)                                     | Cohort                | All Patients<br>N=74,947<br>Pairs | Quintiles of Risk on Admission (Q1 = Lowest) |                         |                         |                         |                         | Trend<br>P-<br>value* |
|-----------------------------------------------------------------|-----------------------|-----------------------------------|----------------------------------------------|-------------------------|-------------------------|-------------------------|-------------------------|-----------------------|
|                                                                 |                       |                                   | Q1<br>N=13,975<br>Pairs                      | Q2<br>N=13,888<br>Pairs | Q3<br>N=14,904<br>Pairs | Q4<br>N=15,279<br>Pairs | Q5<br>N=16,901<br>Pairs |                       |
| 30-day Payments<br>Without Geo, IME, or<br>DSH (\$, m-estimate) | Difference in Outcome | 1,408                             | 757                                          | 1,089                   | 1,372                   | 1,565                   | 2,130                   |                       |
|                                                                 | P-value               | <.0001                            | <.0001                                       | <.0001                  | <.0001                  | <.0001                  | <.0001                  |                       |

P-values for binary outcomes overall and within strata were calculated using McNemar's test. P-values and estimates for continuous outcomes overall and within strata were calculated using M-statistics.

\*Trends for binary outcomes were tested using the Mantel test for trend, while trends for continuous outcomes were tested using robust regression.

**Appendix Table 12. Combined AMI, HF, PNA Value Estimates:** expressed as increased dollars at teaching hospitals per 1% change in mortality.

| Outcome<br>(% unless noted)                              | Cohort                | Combined<br>Patients<br>N=203,922 Pairs | Combined Quintiles of Risk on Admission (Q1 = Lowest) |                         |                         |                         |                         |
|----------------------------------------------------------|-----------------------|-----------------------------------------|-------------------------------------------------------|-------------------------|-------------------------|-------------------------|-------------------------|
|                                                          |                       |                                         | Q1<br>N=41,851<br>Pairs                               | Q2<br>N=39,207<br>Pairs | Q3<br>N=39,738<br>Pairs | Q4<br>N=40,547<br>Pairs | Q5<br>N=42,579<br>Pairs |
|                                                          | % of Pairs            | 100.0%                                  | 20.5%                                                 | 19.2%                   | 19.5%                   | 19.9%                   | 20.9%                   |
| 30-Day Mortality<br>(%)                                  | Teach. Hosp. Patients | 10.7%                                   | 2.5%                                                  | 4.8%                    | 7.9%                    | 13.1%                   | 24.6%                   |
|                                                          | Nonteaching Controls  | 12.0%                                   | 2.6%                                                  | 5.4%                    | 8.9%                    | 14.9%                   | 27.6%                   |
|                                                          | Difference in Outcome | -1.3%                                   | -0.1%                                                 | -0.6%                   | -0.9%                   | -1.8%                   | -3.0%                   |
|                                                          | P-value               | <.0001                                  | 0.4670                                                | 0.0001                  | <.0001                  | <.0001                  | <.0001                  |
| 30-day Resource Cost<br>(\$, m-estimate)                 | Teach. Hosp. Patients | 19,249                                  | 16,464                                                | 18,378                  | 19,041                  | 20,051                  | 22,265                  |
|                                                          | Nonteaching Controls  | 18,944                                  | 17,000                                                | 18,489                  | 18,848                  | 19,450                  | 20,901                  |
|                                                          | Difference in Outcome | 273                                     | -546                                                  | -140                    | 182                     | 557                     | 1,289                   |
|                                                          | P-value               | <.0001                                  | <.0001                                                | 0.2904                  | 0.1643                  | <.0001                  | <.0001                  |
|                                                          | Value Point Estimate  | \$211                                   | N.C.                                                  | -\$234                  | \$193                   | \$318                   | \$427                   |
| Value 95% CI                                             | (\$119, \$303)        | N.C.                                    | (\$-680, \$211)                                       | (\$-102, \$489)         | (\$143, \$493)          | (\$309, \$546)          |                         |
| 30-day Payments<br>Total (\$, m-estimate)                | Teach. Hosp. Patients | 22,304                                  | 21,075                                                | 22,125                  | 21,863                  | 22,490                  | 23,913                  |
|                                                          | Nonteaching Controls  | 17,141                                  | 16,703                                                | 17,420                  | 17,044                  | 16,899                  | 17,624                  |
|                                                          | Difference in Outcome | 5,048                                   | 4,277                                                 | 4,629                   | 4,715                   | 5,431                   | 6,120                   |
|                                                          | P-value               | <.0001                                  | <.0001                                                | <.0001                  | <.0001                  | <.0001                  | <.0001                  |
|                                                          | Value Point Estimate  | \$3,904                                 | N.C.                                                  | \$7,755                 | \$5,010                 | \$3,097                 | \$2,030                 |
| 95% CI                                                   | (\$3,336, \$4,472)    | N.C.                                    | (\$3,818, \$11,692)                                   | (\$2,929, \$7,091)      | (\$2,257, \$3,938)      | (\$1,634, \$2,425)      |                         |
| 30-day Payments<br>Without Geography<br>(\$, m-estimate) | Teach. Hosp. Patients | 21,923                                  | 20,788                                                | 21,788                  | 21,490                  | 22,075                  | 23,443                  |
|                                                          | Nonteaching Controls  | 17,166                                  | 16,779                                                | 17,476                  | 17,077                  | 16,904                  | 17,593                  |
|                                                          | Difference in Outcome | 4,651                                   | 3,915                                                 | 4,242                   | 4,316                   | 5,024                   | 5,694                   |
|                                                          | P-value               | <.0001                                  | <.0001                                                | <.0001                  | <.0001                  | <.0001                  | <.0001                  |
|                                                          | Value Point Estimate  | \$3,597                                 | N.C.                                                  | \$7,107                 | \$4,586                 | \$2,865                 | \$1,888                 |
| 95% CI                                                   | (\$3,055, \$4,138)    | N.C.                                    | (\$3,310, \$10,903)                                   | (\$2,663, \$6,509)      | (\$2,068, \$3,662)      | (\$1,510, \$2,266)      |                         |
| 30-day Payments<br>Without IME<br>(\$, m-estimate)       | Teach. Hosp. Patients | 19,821                                  | N.C.                                                  | 19,669                  | 19,439                  | 19,991                  | 21,265                  |
|                                                          | Nonteaching Controls  | 16,898                                  | 16,423                                                | 17,113                  | 16,794                  | 16,694                  | 17,449                  |
|                                                          | Difference in Outcome | 2,858                                   | 2,237                                                 | 2,505                   | 2,593                   | 3,192                   | 3,713                   |
|                                                          | P-value               | <.0001                                  | <.0001                                                | <.0001                  | <.0001                  | <.0001                  | <.0001                  |
|                                                          | Value Point Estimate  | \$2,210                                 | N.C.                                                  | \$4,197                 | \$2,755                 | \$1,820                 | \$1,231                 |
| 95% CI                                                   | (\$1,881, \$2,539)    | N.C.                                    | (\$2,025, \$6,369)                                    | (\$1,589, \$3,920)      | (\$1,316, \$2,325)      | (\$987, \$1,476)        |                         |
| 30-day Payments<br>Without DSH<br>(\$, m-estimate)       | Teach. Hosp. Patients | 20,888                                  | 19,623                                                | 20,737                  | 20,493                  | 21,089                  | 22,447                  |
|                                                          | Nonteaching Controls  | 16,455                                  | 15,986                                                | 16,725                  | 16,382                  | 16,247                  | 16,926                  |
|                                                          | Difference in Outcome | 4,332                                   | 3,566                                                 | 3,942                   | 4,028                   | 4,708                   | 5,360                   |
|                                                          | P-value               | <.0001                                  | <.0001                                                | <.0001                  | <.0001                  | <.0001                  | <.0001                  |
|                                                          | Value Point Estimate  | \$3,350                                 | N.C.                                                  | \$6,605                 | \$4,280                 | \$2,685                 | \$1,777                 |
| 95% CI                                                   | (\$2,852, \$3,848)    | N.C.                                    | (\$3,090, \$10,120)                                   | (\$2,538, \$6,021)      | (\$1,966, \$3,403)      | (\$1,417, \$2,138)      |                         |
| 30-day Payments                                          | Teach. Hosp. Patients | 19,450                                  | 18,416                                                | 19,327                  | 19,067                  | 19,584                  | 20,810                  |

| Outcome<br>(% unless noted)                                        | Cohort                | Combined<br>Patients<br>N=203,922 Pairs | Combined Quintiles of Risk on Admission (Q1 = Lowest) |                         |                         |                         |                         |
|--------------------------------------------------------------------|-----------------------|-----------------------------------------|-------------------------------------------------------|-------------------------|-------------------------|-------------------------|-------------------------|
|                                                                    |                       |                                         | Q1<br>N=41,851<br>Pairs                               | Q2<br>N=39,207<br>Pairs | Q3<br>N=39,738<br>Pairs | Q4<br>N=40,547<br>Pairs | Q5<br>N=42,579<br>Pairs |
| Without<br>Geography or IME<br>(\$, m-estimate)                    | Nonteaching Controls  | 16,923                                  | 16,497                                                | 17,164                  | 16,834                  | 16,694                  | 17,415                  |
|                                                                    | Difference in Outcome | 2,468                                   | 1,880                                                 | 2,126                   | 2,198                   | 2,791                   | 3,295                   |
|                                                                    | P-value               | <.0001                                  | <.0001                                                | <.0001                  | <.0001                  | <.0001                  | <.0001                  |
|                                                                    | Value Point Estimate  | \$1,908                                 | N.C.                                                  | \$3,562                 | \$2,335                 | \$1,592                 | \$1,093                 |
|                                                                    | 95% CI                | (\$1,613, \$2,204)                      | N.C.                                                  | (\$1,617, \$5,507)      | (\$1,326, \$3,344)      | (\$1,137, \$2,047)      | (\$870, \$1,316)        |
| 30-day Payments<br>Without Geography<br>or DSH<br>(\$, m-estimate) | Teach. Hosp. Patients | 20,515                                  | 19,335                                                | 20,395                  | 20,125                  | 20,685                  | 21,981                  |
|                                                                    | Nonteaching Controls  | 16,476                                  | 16,056                                                | 16,777                  | 16,413                  | 16,254                  | 16,896                  |
|                                                                    | Difference in Outcome | 3,938                                   | 3,205                                                 | 3,557                   | 3,631                   | 4,306                   | 4,937                   |
|                                                                    | P-value               | <.0001                                  | <.0001                                                | <.0001                  | <.0001                  | <.0001                  | <.0001                  |
|                                                                    | Value Point Estimate  | \$3,045                                 | N.C.                                                  | \$5,960                 | \$3,858                 | \$2,455                 | \$1,637                 |
| 95% CI                                                             | (\$2,585, \$3,506)    | N.C.                                    | (\$2,768, \$9,152)                                    | (\$2,233, \$5,482)      | (\$1,772, \$3,139)      | (\$1,309, \$1,965)      |                         |
| 30-day Payments<br>Without Geo, IME,<br>or DSH<br>(\$, m-estimate) | Teach. Hosp. Patients | 17,902                                  | 16,855                                                | 17,786                  | 17,587                  | 18,045                  | 19,197                  |
|                                                                    | Nonteaching Controls  | 16,207                                  | 15,746                                                | 16,431                  | 16,145                  | 16,001                  | 16,671                  |
|                                                                    | Difference in Outcome | 1,662                                   | 1,086                                                 | 1,349                   | 1,420                   | 1,972                   | 2,440                   |
|                                                                    | P-value               | <.0001                                  | <.0001                                                | <.0001                  | <.0001                  | <.0001                  | <.0001                  |
|                                                                    | Value Point Estimate  | \$1,286                                 | N.C.                                                  | \$2,259                 | \$1,509                 | \$1,125                 | \$809                   |
| 95% CI                                                             | (\$1,080, \$1,492)    | N.C.                                    | (\$990, \$3,529)                                      | (\$832, \$2,185)        | (\$796, \$1,453)        | (\$641, \$977)          |                         |

Note: The variance for the 95% CIs was obtained from 1,000 jackknife samples.

Value is well defined if there is a significant difference in mortality between groups. Otherwise in this table values are reported as N.C. (not calculated). For all value estimates and confidence intervals reported, all 1,000 jackknives concur in finding a statistically significant difference in mortality.

\*Positive value estimates indicate higher costs and lower mortality at teaching hospitals, negative value implies lower cost and lower mortality at teaching hospitals.

**Appendix Table 12a. AMI Value Estimates:** expressed as increased dollars at teaching hospitals per 1% change in mortality.

| Outcome<br>(% unless noted)                                 | Cohort                               | All Patients<br>N=43,990<br>Pairs | Combined Quintiles of Risk on Admission (Q1 = Lowest) |                        |                        |                        |                               |
|-------------------------------------------------------------|--------------------------------------|-----------------------------------|-------------------------------------------------------|------------------------|------------------------|------------------------|-------------------------------|
|                                                             |                                      |                                   | Q1<br>N=7,908<br>Pairs                                | Q2<br>N=8,516<br>Pairs | Q3<br>N=8,650<br>Pairs | Q4<br>N=9,273<br>Pairs | Q5<br>N=9,643<br>Pairs        |
|                                                             | % of Pairs                           | 100.0%                            | 18.0%                                                 | 19.4%                  | 19.7%                  | 21.1%                  | 21.9%                         |
| 30-Day Mortality (%)                                        | Teach. Hosp. Patients                | 12.1%                             | 2.8%                                                  | 5.3%                   | 8.6%                   | 14.4%                  | 26.5%                         |
|                                                             | Nonteaching Controls                 | 12.9%                             | 2.9%                                                  | 5.5%                   | 9.5%                   | 15.2%                  | 28.6%                         |
|                                                             | Difference in Outcome                | -0.9%                             | -0.1%                                                 | -0.2%                  | -0.8%                  | -0.9%                  | -2.1%                         |
|                                                             | P-value                              | <.0001                            | 0.8481                                                | 0.4762                 | 0.0518                 | 0.1003                 | 0.0009                        |
| 30-day Resource Cost<br>(\$, m-estimate)                    | Teach. Hosp. Patients                | 23,875                            | 19,339                                                | 23,144                 | 24,614                 | 25,543                 | 26,154                        |
|                                                             | Nonteaching Controls                 | 23,327                            | 20,426                                                | 23,744                 | 24,493                 | 23,946                 | 23,815                        |
|                                                             | Difference in Outcome                | 489                               | -1,060                                                | -581                   | 110                    | 1,438                  | 2,222                         |
|                                                             | P-value                              | 0.0013                            | 0.0005                                                | 0.0943                 | 0.7569                 | <.0001                 | <.0001                        |
|                                                             | Value Point Estimate<br>Value 95% CI | \$563<br>(\$138, \$989)           | N.C.<br>N.C.                                          | N.C.<br>N.C.           | N.C.<br>N.C.           | N.C.<br>N.C.           | \$1,045<br>(\$397, \$1,693)   |
| 30-day Payments<br>Total (\$, m-estimate)                   | Teach. Hosp. Patients                | 29,930                            | 28,325                                                | 30,824                 | 30,675                 | 30,496                 | 29,390                        |
|                                                             | Nonteaching Controls                 | 24,060                            | 24,418                                                | 26,055                 | 25,583                 | 23,054                 | 21,544                        |
|                                                             | Difference in Outcome                | 5,795                             | 3,800                                                 | 4,780                  | 5,019                  | 7,241                  | 7,681                         |
|                                                             | P-value                              | <.0001                            | <.0001                                                | <.0001                 | <.0001                 | <.0001                 | <.0001                        |
|                                                             | Value Point Estimate<br>95% CI       | \$6,674<br>(\$3,488, \$9,860)     | N.C.<br>N.C.                                          | N.C.<br>N.C.           | N.C.<br>N.C.           | N.C.<br>N.C.           | \$3,613<br>(\$1,482, \$5,744) |
| 30-day Payments<br>Without<br>Geography<br>(\$, m-estimate) | Teach. Hosp. Patients                | 29,403                            | 27,954                                                | 30,323                 | 30,106                 | 29,905                 | 28,778                        |
|                                                             | Nonteaching Controls                 | 24,124                            | 24,541                                                | 26,155                 | 25,646                 | 23,088                 | 21,519                        |
|                                                             | Difference in Outcome                | 5,218                             | 3,307                                                 | 4,185                  | 4,422                  | 6,628                  | 7,090                         |
|                                                             | P-value                              | <.0001                            | <.0001                                                | <.0001                 | <.0001                 | <.0001                 | <.0001                        |
|                                                             | Value Point Estimate<br>95% CI       | \$6,008<br>(\$3,172, \$8,845)     | N.C.<br>N.C.                                          | N.C.<br>N.C.           | N.C.<br>N.C.           | N.C.<br>N.C.           | \$3,335<br>(\$1,435, \$5,235) |
| 30-day Payments<br>Without IME<br>(\$, m-estimate)          | Teach. Hosp. Patients                | 26,446                            | 24,989                                                | 27,226                 | 27,072                 | 26,900                 | 26,023                        |
|                                                             | Nonteaching Controls                 | 23,416                            | 23,635                                                | 25,281                 | 24,915                 | 22,497                 | 21,148                        |
|                                                             | Difference in Outcome                | 2,966                             | 1,296                                                 | 1,979                  | 2,160                  | 4,254                  | 4,723                         |
|                                                             | P-value                              | <.0001                            | <.0001                                                | <.0001                 | <.0001                 | <.0001                 | <.0001                        |
|                                                             | Value Point Estimate<br>95% CI       | \$3,416<br>(\$1,764, \$5,068)     | N.C.<br>N.C.                                          | N.C.<br>N.C.           | N.C.<br>N.C.           | N.C.<br>N.C.           | \$2,222<br>(\$908, \$3,536)   |
| 30-day Payments<br>Without DSH<br>(\$, m-estimate)          | Teach. Hosp. Patients                | 27,975                            | 26,398                                                | 28,817                 | 28,718                 | 28,494                 | 27,440                        |
|                                                             | Nonteaching Controls                 | 23,035                            | 23,363                                                | 24,979                 | 24,535                 | 22,132                 | 20,639                        |
|                                                             | Difference in Outcome                | 4,865                             | 2,965                                                 | 3,892                  | 4,130                  | 6,241                  | 6,673                         |
|                                                             | P-value                              | <.0001                            | <.0001                                                | <.0001                 | <.0001                 | <.0001                 | <.0001                        |
|                                                             | Value Point Estimate<br>95% CI       | \$5,603<br>(\$2,856, \$8,350)     | N.C.<br>N.C.                                          | N.C.<br>N.C.           | N.C.<br>N.C.           | N.C.<br>N.C.           | \$3,139<br>(\$1,281, \$4,997) |
| 30-day Payments<br>Without Geography                        | Teach. Hosp. Patients                | 25,936                            | 24,626                                                | 26,730                 | 26,553                 | 26,333                 | 25,423                        |
|                                                             | Nonteaching Controls                 | 23,476                            | 23,787                                                | 25,377                 | 24,969                 | 22,520                 | 21,151                        |

| Outcome<br>(% unless noted)<br>or IME<br>(\$, m-estimate)          | Cohort                                                             | All Patients<br>N=43,990<br>Pairs | Combined Quintiles of Risk on Admission (Q1 = Lowest) |                        |                        |                        |                        |        |
|--------------------------------------------------------------------|--------------------------------------------------------------------|-----------------------------------|-------------------------------------------------------|------------------------|------------------------|------------------------|------------------------|--------|
|                                                                    |                                                                    |                                   | Q1<br>N=7,908<br>Pairs                                | Q2<br>N=8,516<br>Pairs | Q3<br>N=8,650<br>Pairs | Q4<br>N=9,273<br>Pairs | Q5<br>N=9,643<br>Pairs |        |
|                                                                    | Difference in Outcome                                              | 2,403                             | 813                                                   | 1,396                  | 1,578                  | 3,675                  | 4,144                  |        |
|                                                                    | P-value                                                            | <.0001                            | 0.0070                                                | <.0001                 | <.0001                 | <.0001                 | <.0001                 |        |
|                                                                    | Value Point Estimate                                               | \$2,767                           | N.C.                                                  | N.C.                   | N.C.                   | N.C.                   | \$1,949                |        |
|                                                                    | 95% CI                                                             | (\$1,436, \$4,098)                | N.C.                                                  | N.C.                   | N.C.                   | N.C.                   | (\$827, \$3,071)       |        |
| 30-day Payments<br>Without Geography<br>or DSH<br>(\$, m-estimate) | Teach. Hosp. Patients                                              | 27,450                            | 26,028                                                | 28,311                 | 28,177                 | 27,903                 | 26,833                 |        |
|                                                                    | Nonteaching Controls                                               | 23,099                            | 23,496                                                | 25,073                 | 24,583                 | 22,152                 | 20,622                 |        |
|                                                                    | Difference in Outcome                                              | 4,295                             | 2,474                                                 | 3,301                  | 3,539                  | 5,643                  | 6,085                  |        |
|                                                                    | P-value                                                            | <.0001                            | <.0001                                                | <.0001                 | <.0001                 | <.0001                 | <.0001                 |        |
|                                                                    | Value Point Estimate                                               | \$4,946                           | N.C.                                                  | N.C.                   | N.C.                   | N.C.                   | \$2,862                |        |
|                                                                    | 95% CI                                                             | (\$2,605, \$7,288)                | N.C.                                                  | N.C.                   | N.C.                   | N.C.                   | (\$1,230, \$4,494)     |        |
|                                                                    | 30-day Payments<br>Without Geo, IME,<br>or DSH<br>(\$, m-estimate) | Teach. Hosp. Patients             | 23,784                                                | 22,559                 | 24,556                 | 24,403                 | 24,210                 | 23,277 |
|                                                                    |                                                                    | Nonteaching Controls              | 22,437                                                | 22,698                 | 24,222                 | 23,860                 | 21,582                 | 20,193 |
| Difference in Outcome                                              |                                                                    | 1,332                             | -145                                                  | 359                    | 551                    | 2,520                  | 2,981                  |        |
| P-value                                                            |                                                                    | <.0001                            | 0.6052                                                | 0.2353                 | 0.0656                 | <.0001                 | <.0001                 |        |
|                                                                    | Value Point Estimate                                               | \$1,534                           | N.C.                                                  | N.C.                   | N.C.                   | N.C.                   | \$1,402                |        |
|                                                                    | 95% CI                                                             | (\$760, \$2,308)                  | N.C.                                                  | N.C.                   | N.C.                   | N.C.                   | (\$585, \$2,220)       |        |

Note: The variance for the 95% CIs was obtained from 1,000 jackknife samples.

Value is well defined if there is a significant difference in mortality between groups. Otherwise in this table values are reported as N.C. (not calculated). For all value estimates and confidence intervals reported, all 1,000 jackknives concur in finding a statistically significant difference in mortality.

\*Positive value estimates indicate higher costs and lower mortality at teaching hospitals, negative value implies lower cost and lower mortality at teaching hospitals.

**Appendix Table 12b. HF Value Estimates:** expressed as increased dollars at teaching hospitals per 1% change in mortality.

| Outcome<br>(% unless noted)                                 | Cohort                | All Patients<br>N=84,985<br>Pairs | Combined Quintiles of Risk on Admission (Q1 = Lowest) |                         |                         |                         |                         |
|-------------------------------------------------------------|-----------------------|-----------------------------------|-------------------------------------------------------|-------------------------|-------------------------|-------------------------|-------------------------|
|                                                             |                       |                                   | Q1<br>N=19,968<br>Pairs                               | Q2<br>N=16,803<br>Pairs | Q3<br>N=16,184<br>Pairs | Q4<br>N=15,995<br>Pairs | Q5<br>N=16,035<br>Pairs |
|                                                             | % of Pairs            | 100.0%                            | 23.5%                                                 | 19.8%                   | 19.0%                   | 18.8%                   | 18.9%                   |
| 30-Day Mortality<br>(%)                                     | Teach. Hosp. Patients | 8.3%                              | 2.5%                                                  | 4.5%                    | 7.0%                    | 10.4%                   | 18.7%                   |
|                                                             | Nonteaching Controls  | 9.3%                              | 2.6%                                                  | 5.1%                    | 7.4%                    | 12.0%                   | 21.4%                   |
|                                                             | Difference in Outcome | -1.0%                             | -0.1%                                                 | -0.6%                   | -0.5%                   | -1.6%                   | -2.6%                   |
|                                                             | P-value               | <.0001                            | 0.3913                                                | 0.0097                  | 0.0941                  | <.0001                  | <.0001                  |
| 30-day Resource Cost<br>(\$, m-estimate)                    | Teach. Hosp. Patients | 19,067                            | 17,755                                                | 18,862                  | 18,803                  | 19,281                  | 20,985                  |
|                                                             | Nonteaching Controls  | 18,267                            | 17,587                                                | 18,318                  | 18,117                  | 18,249                  | 19,257                  |
|                                                             | Difference in Outcome | 756.32                            | 117.68                                                | 518.94                  | 688.53                  | 987.2                   | 1622.94                 |
|                                                             | P-value               | <.0001                            | 0.5278                                                | 0.0112                  | 0.0006                  | <.0001                  | <.0001                  |
|                                                             | Value Point Estimate  | \$730                             | N.C.                                                  | \$855                   | N.C.                    | \$634                   | \$615                   |
| Value 95% CI                                                | (\$465, \$994)        | N.C.                              | (\$101, \$1,810)                                      | N.C.                    | (\$251, \$1,018)        | (\$359, \$871)          |                         |
| 30-day Payments<br>Total (\$, m-estimate)                   | Teach. Hosp. Patients | 21,017                            | 21,750                                                | 21,597                  | 20,388                  | 20,238                  | 20,883                  |
|                                                             | Nonteaching Controls  | 15,677                            | 16,467                                                | 16,284                  | 15,343                  | 14,953                  | 15,183                  |
|                                                             | Difference in Outcome | 5206                              | 5182.34                                               | 5236.66                 | 4922.75                 | 5128.53                 | 5526.14                 |
|                                                             | P-value               | <.0001                            | <.0001                                                | <.0001                  | <.0001                  | <.0001                  | <.0001                  |
|                                                             | Value Point Estimate  | \$5,022                           | N.C.                                                  | \$8,627                 | N.C.                    | \$3,294                 | \$2,095                 |
| 95% CI                                                      | (\$3,729, \$6,315)    | N.C.                              | (\$2,033, \$15,220)                                   | N.C.                    | (\$1,824, \$4,765)      | (\$1,380, \$2,809)      |                         |
| 30-day Payments<br>Without<br>Geography<br>(\$, m-estimate) | Teach. Hosp. Patients | 20,682                            | 21,457                                                | 21,308                  | 20,060                  | 19,890                  | 20,528                  |
|                                                             | Nonteaching Controls  | 15,704                            | 16,523                                                | 16,321                  | 15,363                  | 14,950                  | 15,172                  |
|                                                             | Difference in Outcome | 4857.83                           | 4824.62                                               | 4898.76                 | 4577.08                 | 4781.29                 | 5176.45                 |
|                                                             | P-value               | <.0001                            | <.0001                                                | <.0001                  | <.0001                  | <.0001                  | <.0001                  |
|                                                             | Value Point Estimate  | \$4,686                           | N.C.                                                  | \$8,070                 | N.C.                    | \$3,071                 | \$1,962                 |
| 95% CI                                                      | (\$3,477, \$5,895)    | N.C.                              | (\$1,896, \$14,244)                                   | N.C.                    | (\$1,699, \$4,444)      | (\$1,291, \$2,633)      |                         |
| 30-day Payments<br>Without IME<br>(\$, m-estimate)          | Teach. Hosp. Patients | 18,734                            | 19,327                                                | 19,270                  | 18,207                  | 18,071                  | 18,693                  |
|                                                             | Nonteaching Controls  | 15,495                            | 16,215                                                | 16,038                  | 15,170                  | 14,824                  | 15,078                  |
|                                                             | Difference in Outcome | 3150.7                            | 3048.5                                                | 3147.4                  | 2953.91                 | 3117.2                  | 3488.47                 |
|                                                             | P-value               | <.0001                            | <.0001                                                | <.0001                  | <.0001                  | <.0001                  | <.0001                  |
|                                                             | Value Point Estimate  | \$3,039                           | N.C.                                                  | \$5,185                 | N.C.                    | \$2,002                 | \$1,322                 |
| 95% CI                                                      | (\$2,244, \$3,834)    | N.C.                              | (\$1,190, \$9,180)                                    | N.C.                    | (\$1,094, \$2,911)      | (\$864, \$1,781)        |                         |
| 30-day Payments<br>Without DSH<br>(\$, m-estimate)          | Teach. Hosp. Patients | 19,704                            | 20,216                                                | 20,281                  | 19,166                  | 19,029                  | 19,687                  |
|                                                             | Nonteaching Controls  | 15,067                            | 15,708                                                | 15,629                  | 14,769                  | 14,423                  | 14,660                  |
|                                                             | Difference in Outcome | 4530.46                           | 4408.15                                               | 4555.71                 | 4298.37                 | 4479.93                 | 4901.65                 |
|                                                             | P-value               | <.0001                            | <.0001                                                | <.0001                  | <.0001                  | <.0001                  | <.0001                  |
|                                                             | Value Point Estimate  | \$4,370                           | N.C.                                                  | \$7,505                 | N.C.                    | \$2,878                 | \$1,858                 |
| 95% CI                                                      | (\$3,279, \$5,461)    | N.C.                              | (\$2,027, \$12,983)                                   | N.C.                    | (\$1,580, \$4,176)      | (\$1,238, \$2,478)      |                         |
|                                                             | Teach. Hosp. Patients | 18,413                            | 19,014                                                | 18,975                  | 17,883                  | 17,720                  | 18,327                  |



| Outcome<br>(% unless noted)                                        | Cohort                | All Patients<br>N=84,985<br>Pairs | Combined Quintiles of Risk on Admission (Q1 = Lowest) |                         |                         |                         |                         |
|--------------------------------------------------------------------|-----------------------|-----------------------------------|-------------------------------------------------------|-------------------------|-------------------------|-------------------------|-------------------------|
|                                                                    |                       |                                   | Q1<br>N=19,968<br>Pairs                               | Q2<br>N=16,803<br>Pairs | Q3<br>N=16,184<br>Pairs | Q4<br>N=15,995<br>Pairs | Q5<br>N=16,035<br>Pairs |
| 30-day Payments<br>Without<br>Geography or IME<br>(\$, m-estimate) | Nonteaching Controls  | 15,520                            | 16,278                                                | 16,091                  | 15,199                  | 14,813                  | 15,061                  |
|                                                                    | Difference in Outcome | 2812.91                           | 2697.84                                               | 2816.05                 | 2616.18                 | 2783.74                 | 3145.09                 |
|                                                                    | P-value               | <.0001                            | <.0001                                                | <.0001                  | <.0001                  | <.0001                  | <.0001                  |
|                                                                    | Value Point Estimate  | \$2,713                           | N.C.                                                  | \$4,639                 | N.C.                    | \$1,788                 | \$1,192                 |
|                                                                    | 95% CI                | (\$2,000, \$3,427)                | N.C.                                                  | (\$1,054, \$8,224)      | N.C.                    | (\$971, \$2,605)        | (\$777, \$1,607)        |
| 30-day Payments<br>Without Geography<br>or DSH<br>(\$, m-estimate) | Teach. Hosp. Patients | 19,385                            | 19,927                                                | 19,972                  | 18,844                  | 18,676                  | 19,323                  |
|                                                                    | Nonteaching Controls  | 15,093                            | 15,786                                                | 15,666                  | 14,789                  | 14,414                  | 14,654                  |
|                                                                    | Difference in Outcome | 4185.51                           | 4053.96                                               | 4224.75                 | 3954.24                 | 4141.77                 | 4555.74                 |
|                                                                    | P-value               | <.0001                            | <.0001                                                | <.0001                  | <.0001                  | <.0001                  | <.0001                  |
|                                                                    | Value Point Estimate  | \$4,038                           | N.C.                                                  | \$6,960                 | N.C.                    | \$2,661                 | \$1,727                 |
|                                                                    | 95% CI                | (\$2,993, \$5,082)                | N.C.                                                  | (\$1,628, \$12,291)     | N.C.                    | (\$1,468, \$3,853)      | (\$1,135, \$2,319)      |
| 30-day Payments<br>Without Geo, IME,<br>or DSH<br>(\$, m-estimate) | Teach. Hosp. Patients | 16,984                            | 17,378                                                | 17,511                  | 16,555                  | 16,404                  | 16,989                  |
|                                                                    | Nonteaching Controls  | 14,875                            | 15,524                                                | 15,415                  | 14,591                  | 14,238                  | 14,484                  |
|                                                                    | Difference in Outcome | 2053.55                           | 1837.24                                               | 2057.84                 | 1905.94                 | 2058.05                 | 2429.21                 |
|                                                                    | P-value               | <.0001                            | <.0001                                                | <.0001                  | <.0001                  | <.0001                  | <.0001                  |
|                                                                    | Value Point Estimate  | \$1,981                           | N.C.                                                  | \$3,390                 | N.C.                    | \$1,322                 | \$921                   |
|                                                                    | 95% CI                | (\$1,451, \$2,511)                | N.C.                                                  | (\$744, \$6,036)        | N.C.                    | (\$707, \$1,937)        | (\$594, \$1,247)        |

Note: The variance for the 95% CIs was obtained from 1,000 jackknife samples.

Value is well defined if there is a significant difference in mortality between groups. Otherwise in this table values are reported as N.C. (not calculated). For all value estimates and confidence intervals reported, all 1,000 jackknives concur in finding a statistically significant difference in mortality.

\*Positive value estimates indicate higher costs and lower mortality at teaching hospitals, negative value implies lower cost and lower mortality at teaching hospitals.

**Appendix Table 12c. PNA Value Estimates:** expressed as increased dollars at teaching hospitals per 1% change in mortality.

| Outcome<br>(% unless noted)                                 | Cohort                | All Patients<br>N=74,947 | Combined Quintiles of Risk on Admission (Q1 = Lowest) |                    |                    |                    |                    |
|-------------------------------------------------------------|-----------------------|--------------------------|-------------------------------------------------------|--------------------|--------------------|--------------------|--------------------|
|                                                             |                       |                          | Q1<br>N=13,975                                        | Q2<br>N=13,888     | Q3<br>N=14,904     | Q4<br>N=15,279     | Q5<br>N=16,901     |
|                                                             | % of Pairs            | 100.0%                   | 18.6%                                                 | 18.5%              | 19.9%              | 20.4%              | 22.6%              |
| 30-Day Mortality<br>(%)                                     | Teach. Hosp. Patients | 12.7%                    | 2.3%                                                  | 4.7%               | 8.5%               | 15.1%              | 29.2%              |
|                                                             | Nonteaching Controls  | 14.5%                    | 2.4%                                                  | 5.5%               | 10.0%              | 17.6%              | 33.1%              |
|                                                             | Difference in Outcome | -1.8%                    | 0.0%                                                  | -0.8%              | -1.5%              | -2.5%              | -3.9%              |
|                                                             | P-value               | <.0001                   | 0.9682                                                | 0.0029             | <.0001             | <.0001             | <.0001             |
| 30-day Resource Cost<br>(\$, m-estimate)                    | Teach. Hosp. Patients | 16,762                   | 13,005                                                | 14,862             | 16,066             | 17,627             | 21,288             |
|                                                             | Nonteaching Controls  | 17,143                   | 14,220                                                | 15,476             | 16,420             | 18,001             | 20,791             |
|                                                             | Difference in Outcome | -382                     | -1,167                                                | -656               | -323               | -356               | 453                |
|                                                             | P-value               | <.0001                   | <.0001                                                | 0.0003             | 0.0762             | 0.0653             | 0.0308             |
|                                                             | Value Point Estimate  | -\$208                   | N.C.                                                  | -\$821             | -\$217             | -\$142             | \$117              |
|                                                             | Value 95% CI          | (-\$300, -\$116)         | N.C.                                                  | (-\$1,442, -\$200) | (-\$459, \$25)     | (-\$293, \$9)      | (\$2, \$231)       |
| 30-day Payments<br>Total (\$, m-estimate)                   | Teach. Hosp. Patients | 19,314                   | 16,117                                                | 17,479             | 18,416             | 20,046             | 23,687             |
|                                                             | Nonteaching Controls  | 14,789                   | 12,734                                                | 13,609             | 14,017             | 15,254             | 17,752             |
|                                                             | Difference in Outcome | 4,435                    | 3,314                                                 | 3,828              | 4,316              | 4,690              | 5,785              |
|                                                             | P-value               | <.0001                   | <.0001                                                | <.0001             | <.0001             | <.0001             | <.0001             |
|                                                             | Value Point Estimate  | \$2,419                  | N.C.                                                  | \$4,789            | \$2,897            | \$1,871            | \$1,490            |
|                                                             | 95% CI                | (\$1,968, \$2,870)       | N.C.                                                  | (\$1,534, \$8,044) | (\$1,576, \$4,219) | (\$1,217, \$2,525) | (\$1,121, \$1,860) |
| 30-day Payments<br>Without<br>Geography<br>(\$, m-estimate) | Teach. Hosp. Patients | 18,950                   | 15,854                                                | 17,166             | 18,063             | 19,673             | 23,216             |
|                                                             | Nonteaching Controls  | 14,787                   | 12,780                                                | 13,625             | 14,038             | 15,232             | 17,681             |
|                                                             | Difference in Outcome | 4,081                    | 3,009                                                 | 3,498              | 3,954              | 4,329              | 5,378              |
|                                                             | P-value               | <.0001                   | <.0001                                                | <.0001             | <.0001             | <.0001             | <.0001             |
|                                                             | Value Point Estimate  | \$2,226                  | N.C.                                                  | \$4,376            | \$2,655            | \$1,727            | \$1,386            |
|                                                             | 95% CI                | (\$1,809, \$2,643)       | N.C.                                                  | (\$1,392, \$7,361) | (\$1,439, \$3,871) | (\$1,121, \$2,334) | (\$1,042, \$1,729) |
| 30-day Payments<br>Without IME<br>(\$, m-estimate)          | Teach. Hosp. Patients | 17,195                   | 14,359                                                | 15,566             | 16,414             | 17,856             | 21,045             |
|                                                             | Nonteaching Controls  | 14,690                   | 12,649                                                | 13,506             | 13,923             | 15,158             | 17,622             |
|                                                             | Difference in Outcome | 2,456                    | 1,674                                                 | 2,046              | 2,433              | 2,630              | 3,343              |
|                                                             | P-value               | <.0001                   | <.0001                                                | <.0001             | <.0001             | <.0001             | <.0001             |
|                                                             | Value Point Estimate  | \$1,340                  | N.C.                                                  | \$2,560            | \$1,634            | \$1,049            | \$861              |
|                                                             | 95% CI                | (\$1,083, \$1,597)       | N.C.                                                  | (\$768, \$4,353)   | (\$863, \$2,404)   | (\$669, \$1,430)   | (\$639, \$1,083)   |
| 30-day Payments<br>Without DSH<br>(\$, m-estimate)          | Teach. Hosp. Patients | 18,069                   | 15,021                                                | 16,351             | 17,233             | 18,785             | 22,198             |
|                                                             | Nonteaching Controls  | 14,206                   | 12,210                                                | 13,080             | 13,476             | 14,647             | 17,027             |
|                                                             | Difference in Outcome | 3,796                    | 2,751                                                 | 3,251              | 3,666              | 4,036              | 5,051              |
|                                                             | P-value               | <.0001                   | <.0001                                                | <.0001             | <.0001             | <.0001             | <.0001             |
|                                                             | Value Point Estimate  | \$2,071                  | N.C.                                                  | \$4,068            | \$2,461            | \$1,610            | \$1,301            |
|                                                             | 95% CI                | (\$1,683, \$2,459)       | N.C.                                                  | (\$1,292, \$6,844) | (\$1,335, \$3,588) | (\$1,044, \$2,176) | (\$978, \$1,625)   |
| 30-day Payments<br>Without                                  | Teach. Hosp. Patients | 16,841                   | 14,105                                                | 15,261             | 16,067             | 17,488             | 20,594             |
|                                                             | Nonteaching Controls  | 14,687                   | 12,692                                                | 13,528             | 13,951             | 15,143             | 17,555             |

| Outcome<br>(% unless noted)                                           | Cohort                | All Patients<br>N=74,947 | Combined Quintiles of Risk on Admission (Q1 = Lowest) |                    |                    |                  |                  |
|-----------------------------------------------------------------------|-----------------------|--------------------------|-------------------------------------------------------|--------------------|--------------------|------------------|------------------|
|                                                                       |                       |                          | Q1<br>N=13,975                                        | Q2<br>N=13,888     | Q3<br>N=14,904     | Q4<br>N=15,279   | Q5<br>N=16,901   |
| Geography or IME<br>(\$, m-estimate)                                  | Difference in Outcome | 2,109                    | 1,374                                                 | 1,724              | 2,082              | 2,276            | 2,943            |
|                                                                       | P-value               | <.0001                   | <.0001                                                | <.0001             | <.0001             | <.0001           | <.0001           |
|                                                                       | Value Point Estimate  | \$1,150                  | N.C.                                                  | \$2,157            | \$1,397            | \$908            | \$758            |
|                                                                       | 95% CI                | (\$926, \$1,374)         | N.C.                                                  | (\$626, \$3,689)   | (\$728, \$2,066)   | (\$574, \$1,242) | (\$560, \$957)   |
| 30-day Payments<br>Without<br>Geography<br>or DSH<br>(\$, m-estimate) | Teach. Hosp. Patients | 17,709                   | 14,753                                                | 16,045             | 16,883             | 18,416           | 21,738           |
|                                                                       | Nonteaching Controls  | 14,206                   | 12,246                                                | 13,100             | 13,505             | 14,637           | 16,962           |
|                                                                       | Difference in Outcome | 3,443                    | 2,446                                                 | 2,925              | 3,305              | 3,677            | 4,646            |
|                                                                       | P-value               | <.0001                   | <.0001                                                | <.0001             | <.0001             | <.0001           | <.0001           |
| 30-day Payments<br>Without<br>Geo, IME, or DSH<br>(\$, m-estimate)    | Value Point Estimate  | \$1,878                  | N.C.                                                  | \$3,660            | \$2,219            | \$1,467          | \$1,197          |
|                                                                       | 95% CI                | (\$1,525, \$2,231)       | N.C.                                                  | (\$1,151, \$6,169) | (\$1,197, \$3,240) | (\$949, \$1,985) | (\$898, \$1,496) |
|                                                                       | Teach. Hosp. Patients | 15,503                   | 12,939                                                | 14,044             | 14,782             | 16,121           | 19,003           |
|                                                                       | Nonteaching Controls  | 14,073                   | 12,141                                                | 12,971             | 13,387             | 14,511           | 16,790           |
| 30-day Payments<br>Without<br>Geo, IME, or DSH<br>(\$, m-estimate)    | Difference in Outcome | 1,408                    | 757                                                   | 1,089              | 1,372              | 1,565            | 2,130            |
|                                                                       | P-value               | <.0001                   | <.0001                                                | <.0001             | <.0001             | <.0001           | <.0001           |
|                                                                       | Value Point Estimate  | \$768                    | N.C.                                                  | \$1,363            | \$921              | \$624            | \$549            |
|                                                                       | 95% CI                | (\$612, \$925)           | N.C.                                                  | (\$346, \$2,379)   | (\$458, \$1,384)   | (\$383, \$865)   | (\$397, \$700)   |

Note: The variance for the 95% CIs was obtained from 1,000 jackknife samples.

Value is well defined if there is a significant difference in mortality between groups. Otherwise in this table values are reported as N.C. (not calculated). For all value estimates and confidence intervals reported, all 1,000 jackknives concur in finding a statistically significant difference in mortality.

\*Positive value estimates indicate higher costs and lower mortality at teaching hospitals, negative value implies lower cost and lower mortality at teaching hospitals.

**Appendix Table 13. Comparison of Cost and Payment Results with and Without Post-Acute-Care (PAC) Payments\*:** Versions with PAC payments include payments tracked in Skilled Nursing Facility, Hospice, Home Health Agency, and Durable Medical Equipment files.

| Outcome<br>(% unless noted)                                                     | Cohort      | AMI<br>N=43,990<br>Pairs | HF<br>N=84,98<br>5 Pairs | PNA<br>N=74,947<br>Pairs | Combined<br>Patients<br>N=203,922<br>Pairs | Combined Quintiles of Risk on Admission<br>(Q1 = Lowest) |                         |                         |                         |                         |
|---------------------------------------------------------------------------------|-------------|--------------------------|--------------------------|--------------------------|--------------------------------------------|----------------------------------------------------------|-------------------------|-------------------------|-------------------------|-------------------------|
|                                                                                 |             |                          |                          |                          |                                            | Q1<br>N=41,851<br>Pairs                                  | Q2<br>N=39,207<br>Pairs | Q3<br>N=39,738<br>Pairs | Q4<br>N=40,547<br>Pairs | Q5<br>N=42,579<br>Pairs |
|                                                                                 |             |                          |                          |                          |                                            |                                                          |                         |                         |                         |                         |
|                                                                                 | % of Pairs  | 21.5                     | 41.7                     | 36.8                     | 100.0                                      | 20.5                                                     | 19.2                    | 19.5                    | 19.9                    | 20.9                    |
| 30-day Resource Cost without Post-Acute Payments (\$, m-est.)                   | Teaching    | 23,875                   | 19,067                   | 16,762                   | 19,249                                     | 16,464                                                   | 18,378                  | 19,041                  | 20,051                  | 22,265                  |
|                                                                                 | Nonteaching | 23,327                   | 18,267                   | 17,143                   | 18,944                                     | 17,000                                                   | 18,489                  | 18,848                  | 19,450                  | 20,901                  |
|                                                                                 | Difference  | 489 <sup>d</sup>         | 756 <sup>d</sup>         | -382 <sup>d</sup>        | 273 <sup>d</sup>                           | -546 <sup>d</sup>                                        | -140                    | 182                     | 557 <sup>d</sup>        | 1,289 <sup>d</sup>      |
| 30-day Resource Cost with PAC Payments (\$, m-est.)                             | Teaching    | 28,764                   | 24,989                   | 21,353                   | 24,450                                     | 20,245                                                   | 22,991                  | 24,354                  | 25,883                  | 28,660                  |
|                                                                                 | Nonteaching | 28,427                   | 24,157                   | 21,806                   | 24,209                                     | 21,085                                                   | 23,335                  | 24,199                  | 25,253                  | 27,084                  |
|                                                                                 | Difference  | 268                      | 765 <sup>d</sup>         | -444 <sup>d</sup>        | 206 <sup>b</sup>                           | -852 <sup>d</sup>                                        | -365 <sup>a</sup>       | 136                     | 584 <sup>c</sup>        | 1,490 <sup>d</sup>      |
| 30-day Payments without PAC Payments (\$, m-est.)                               | Teaching    | 29,930                   | 21,017                   | 19,314                   | 22,304                                     | 21,075                                                   | 22,125                  | 21,863                  | 22,490                  | 23,913                  |
|                                                                                 | Nonteaching | 24,060                   | 15,677                   | 14,789                   | 17,141                                     | 16,703                                                   | 17,420                  | 17,044                  | 16,899                  | 17,624                  |
|                                                                                 | Difference  | 5,795 <sup>d</sup>       | 5,206 <sup>d</sup>       | 4,435 <sup>d</sup>       | 5,048 <sup>d</sup>                         | 4,277 <sup>d</sup>                                       | 4,629 <sup>d</sup>      | 4,715 <sup>d</sup>      | 5,431 <sup>d</sup>      | 6,120 <sup>d</sup>      |
| 30-day Payments with PAC Payments (\$, m-est.)                                  | Teaching    | 31,931                   | 23,647                   | 21,918                   | 24,790                                     | 22,499                                                   | 24,164                  | 24,503                  | 25,531                  | 27,197                  |
|                                                                                 | Nonteaching | 25,942                   | 18,188                   | 17,295                   | 19,515                                     | 18,031                                                   | 19,431                  | 19,582                  | 19,787                  | 20,715                  |
|                                                                                 | Difference  | 5,907 <sup>d</sup>       | 5,341 <sup>d</sup>       | 4,548 <sup>d</sup>       | 5,171 <sup>d</sup>                         | 4,369 <sup>d</sup>                                       | 4,665 <sup>d</sup>      | 4,832 <sup>d</sup>      | 5,579 <sup>d</sup>      | 6,335 <sup>d</sup>      |
| 30-day Payments without PAC Payments, and without Geo, IME, or DSH (\$, m-est.) | Teaching    | 23,784                   | 16,984                   | 15,503                   | 17,902                                     | 16,855                                                   | 17,786                  | 17,587                  | 18,045                  | 19,197                  |
|                                                                                 | Nonteaching | 22,437                   | 14,875                   | 14,073                   | 16,207                                     | 15,746                                                   | 16,431                  | 16,145                  | 16,001                  | 16,671                  |
|                                                                                 | Difference  | 1,332 <sup>d</sup>       | 2,054 <sup>d</sup>       | 1,408 <sup>d</sup>       | 1,662 <sup>d</sup>                         | 1,086 <sup>d</sup>                                       | 1,349 <sup>d</sup>      | 1,420 <sup>d</sup>      | 1,972 <sup>d</sup>      | 2,440 <sup>d</sup>      |
| 30-day Payments with PAC Payments, and without Geo, IME, or DSH (\$, m-est.)    | Teaching    | 25,786                   | 19,632                   | 18,118                   | 20,395                                     | 18,252                                                   | 19,841                  | 20,226                  | 21,090                  | 22,492                  |
|                                                                                 | Nonteaching | 24,312                   | 17,400                   | 16,576                   | 18,578                                     | 17,072                                                   | 18,439                  | 18,687                  | 18,904                  | 19,766                  |
|                                                                                 | Difference  | 1,447 <sup>d</sup>       | 2,187 <sup>d</sup>       | 1,522 <sup>d</sup>       | 1,785 <sup>d</sup>                         | 1,173 <sup>d</sup>                                       | 1,387 <sup>d</sup>      | 1,534 <sup>d</sup>      | 2,121 <sup>d</sup>      | 2,656 <sup>d</sup>      |

P-value key: a: P < 0.05; b: P < 0.01; c: P < 0.001; d: P < 0.0001. Non-significant differences have no letter.  
P-values and estimates for continuous outcomes overall and within strata were calculated using M-statistics. \*Trends for continuous outcomes were tested using robust regression.

## REFERENCES

14. **Silber JH, Rosenbaum PR, McHugh MD, et al.** Comparison of the value of nursing work environments in hospitals across different levels of patient risk. *JAMA Surg.* 2016;151:527-36.
30. **Silber JH, Rosenbaum PR, Kelz RR, et al.** Medical and financial risks associated with surgery in the elderly obese. *Ann Surg.* 2012;256:79-86.
31. **Halpern NA, Pastores SM.** Critical care medicine in the United States 2000-2005: An analysis of bed numbers, occupancy rates, payer mix, and costs. *Crit Care Med.* 2010;38:65-71.

## WEB-ONLY REFERENCE

49. **Centers for Medicare & Medicaid Services.** FY 2012 Final Rule Tables. Available at: <https://www.cms.gov/Medicare/Medicare-Fee-for-Service-Payment/AcuteInpatientPPS/Acute-Inpatient-Files-for-Download-Items/FY2012-FinalRule-CorrectionNotice-Files.html>. Accessed March 7, 2019.
50. **Centers for Medicare & Medicaid Services.** FY 2013 Final Rule Tables. Available at: <https://www.cms.gov/Medicare/Medicare-Fee-for-Service-Payment/AcuteInpatientPPS/FY-2013-IPPS-Final-Rule-Home-Page-Items/FY2013-Final-Rule-Tables.html>. Accessed March 7, 2019.
51. **Centers for Medicare & Medicaid Services.** FY 2014 Final Rule Tables. Available at: <https://www.cms.gov/Medicare/Medicare-Fee-for-Service-Payment/AcuteInpatientPPS/Acute-Inpatient-Files-for-Download-Items/FY2014-FinalRule-CorrectionNotice-Files.html>. Accessed March 7, 2019.
52. **Centers for Medicare & Medicaid Services.** Provider Specific Data for Public Use in Text Format. Available at: [https://www.cms.gov/Medicare/Medicare-Fee-for-Service-Payment/ProspectivePaymentSystem/psf\\_text.html](https://www.cms.gov/Medicare/Medicare-Fee-for-Service-Payment/ProspectivePaymentSystem/psf_text.html). Accessed March 7, 2019.
53. **Centers for Medicare & Medicaid Services.** PFS Relative Value Files. Available at: <https://www.cms.gov/Medicare/Medicare-Fee-for-Service-Payment/PhysicianFeeSched/PFS-Relative-Value-Files.html>. Accessed March 7, 2019.
